# Supplementary material for: Limited implementation of the framework convention on tobacco control’s tobacco tax provision: global comparison
Source: PubMed Central journal article supplement — BMJ Open. 2018 Oct 2;8(10):e021340. doi: 10.1136/bmjopen-2017-021340 (PMC6169655; doi:10.1136/bmjopen-2017-021340), 2018-10-02
Supplement: bmjopen-2017-021340.draft_revisions.pdf [file bmjopen-2017-021340.draft_revisions.pdf]

# BMJ Open

BMJ Open is committed to open peer review. As part of this commitment we make the peer review history of every article we publish publicly available.

When an article is published we post the peer reviewers' comments and the authors' responses online. We also post the versions of the paper that were used during peer review. These are the versions that the peer review comments apply to.

The versions of the paper that follow are the versions that were submitted during the peer review process. They are not the versions of record or the final published versions. They should not be cited or distributed as the published version of this manuscript.

BMJ Open is an open access journal and the full, final, typeset and author-corrected version of record of the manuscript is available on our site with no access controls, subscription charges or pay-per-view fees (<http://bmjopen.bmj.com>).

If you have any questions on BMJ Open's open peer review process please email [info.bmjopen@bmj.com](mailto:info.bmjopen@bmj.com)

# BMJ Open

## IMPLEMENTATION OF THE FCTC TOBACCO TAX PROVISION: LIMITED PROGRESS

|                               |                                                                                                                                                                                                                                                                                                                                                                                                                                         |
|-------------------------------|-----------------------------------------------------------------------------------------------------------------------------------------------------------------------------------------------------------------------------------------------------------------------------------------------------------------------------------------------------------------------------------------------------------------------------------------|
| Journal:                      | <i>BMJ Open</i>                                                                                                                                                                                                                                                                                                                                                                                                                         |
| Manuscript ID                 | bmjopen-2017-021340                                                                                                                                                                                                                                                                                                                                                                                                                     |
| Article Type:                 | Research                                                                                                                                                                                                                                                                                                                                                                                                                                |
| Date Submitted by the Author: | 22-Dec-2017                                                                                                                                                                                                                                                                                                                                                                                                                             |
| Complete List of Authors:     | Hiilamo, Heikki; University of Helsinki, Department of Social Research, social and public policy; VID Spezialized University, Oslo, Norway , •Faculty of Theology, Diaconia and Leadership Studies<br>Glantz, S; University of California, San Francisco, Center for Tobacco Control Research and Education, Philip R. Lee Institute for Health Policy Studies, Helen Diller Family Comprehensive Cancer Center, Department of Medicine |
| Keywords:                     | tobacco industry, tobacco taxation, FCTC                                                                                                                                                                                                                                                                                                                                                                                                |
|                               |                                                                                                                                                                                                                                                                                                                                                                                                                                         |

SCHOLARONE™  
Manuscripts

Peer Review Only

1  
2  
3 **IMPLEMENTATION OF THE FCTC TOBACCO TAX PROVISION:**  
4  
5 **LIMITED PROGRESS**  
6  
7  
8  
9

10 Heikki Hiilamo<sup>ab</sup>, PhD

11  
12 Stanton Glantz<sup>c</sup>, PhD

13  
14  
15 <sup>a</sup> Social and public policy, Department of Social Research, 00014 University of Helsinki,  
16 Finland, [heikki.hiilamo@helsinki.fi](mailto:heikki.hiilamo@helsinki.fi)

17 <sup>b</sup> VID Specialized University, •Faculty of Theology, Diaconia and Leadership Studies, Oslo,NO-  
18 0319 Norway

19 <sup>c</sup>Center for Tobacco Control Research and Education, Philip R. Lee Institute for Health Policy  
20 Studies, Helen Diller Family Comprehensive Cancer Center, Department of Medicine  
21 University of California San Francisco, San Francisco, CA 94143-1390, [stanton.glantz@ucsf.edu](mailto:stanton.glantz@ucsf.edu)  
22  
23  
24  
25

26 Corresponding Author:  
27 Heikki Hiilamo, Professor  
28 University of Helsinki  
29 Department of Social Research  
30 PL 16  
31 00014 Helsingin yliopisto  
32 Finland  
33 Tel. +358403587203  
34 Fax. +358294124835  
35 [heikki.hiilamo@helsinki.fi](mailto:heikki.hiilamo@helsinki.fi)  
36  
37  
38

39 Word count 3425  
40  
41  
42  
43  
44  
45  
46  
47  
48  
49  
50  
51  
52  
53  
54  
55  
56  
57  
58  
59  
60

## ABSTRACT

**OBJECTIVE:** Evaluate implementation of the tobacco tax provision (Article 6) in the World Health Organization Framework Convention on Tobacco Control (FCTC) using the WHO MPOWER as the standard for implementation.

**METHODS:** Based on MPOWER, we compared adoption of at least 50% and 75% (high) of retail price tobacco tax rates for the most sold brands in countries that did versus did not ratify the FCTC, accounting for years since ratification. We also compared cigarette affordability in 2014 to 1999.

**RESULTS:** FCTC ratification was not associated with implementing high tobacco taxes. More fragile countries in terms of security, political, economic, and social development were less likely to have at least 50% and 75% tobacco tax rates in 2014 compared with 1999. The higher the cigarette prices in 1999 the less likely the countries were to have at least 75% tobacco tax rates in 2014. However, cigarettes were less affordable in 2014 than in 1999 in countries that had ratified FCTC earlier.

**CONCLUSIONS:** Despite widespread FCTC ratification, implementing higher tobacco taxes remains incomplete. Guidelines for FCTC Article 6 implementation should assign definite targets for tobacco taxes and for implementation of a tax escalator that gradually increases taxes to match rising level of incomes. Fragile countries are less likely to have high tobacco taxes and less affordable cigarettes. The tobacco control community should intensify efforts to help especially more fragile countries to improve performance in FCTC implementation both through strengthening their administrative and technical capacity and through supporting the basic functions of government.

## WHAT THIS PAPER ADDS

- Tobacco taxes can effectively reduce tobacco use, but raising tobacco taxes remained the least implemented demand reduction measure and was the measure that had seen the least improvement over last ten years.
- FCTC ratification was not associated with implementing high tobacco taxes.
- Compared with 1999 cigarettes were not less affordable in 2014. However, this was the case in countries that had ratified FCTC earlier.
- Guidelines for FCTC Article 6 implementation should assign definite targets for tobacco taxes and for implementation of a tax escalator that gradually increased taxes to match raising level of incomes.

## INTRODUCTION

Raising tobacco taxes is an effective strategy to reduce tobacco use<sup>1</sup>. On average a 10% price increase will reduce tobacco use by 4% in high income countries and by 5% among low- and middle-income countries.<sup>2</sup> Article 6 of the World Health Organization (WHO) Framework Convention on Tobacco Control<sup>3</sup> (FCTC) commits parties to implement “tax policies and, where appropriate, price policies, on tobacco products so as to contribute to the health objectives aimed at reducing tobacco consumption”.<sup>3</sup> Article 6 implementation guidelines<sup>4</sup> include detailed recommendations for additional guiding principles, tobacco taxation levels, taxation systems and their administration. They recommend tax policies which take into account tobacco products’ price elasticity (the rate by which tobacco consumption decreases as result of price increases) and income elasticity (the sensitivity of tobacco consumption to income changes) to make tobacco products less affordable over time, but does not set any specific target for prices or taxes.

Tobacco taxes are politically difficult to implement because tobacco companies fight them<sup>5</sup> by commissioning research claiming economic benefits of tobacco, creating alliances,<sup>6</sup> including with progressive organizations,<sup>7</sup> lobbying ministries of finance with poor knowledge of public health and FCTC requirements,<sup>8</sup> and arguing tax increases drive illicit trade.<sup>5</sup> They also learned how to cope with tax increases and sometimes actually benefit from them by overshifting taxes on premium brands to increase profits while downshifting taxes on ultra-low-price brands to cushion the effects of tax increases on total consumption.<sup>9-12</sup> Even a series of extranormal tax increases, such as in Australia<sup>13</sup>, may not increase tax rate if the industry keeps overshifting tax increases to prices. In this sense, tax rates can be a relatively poor indicator of the price of cigarettes.

1  
2  
3 WHO established the MPOWER measures in 2008 to scale up key FCTC demand  
4  
5 reduction measures including tobacco taxes. A key finding of the 2015 MPOWER report was  
6  
7 that taxes were the least implemented MPOWER measure with only 10% of the world's  
8  
9 population (living in 33 countries) covered by taxes of at least 75% of retail price<sup>5</sup>. This paper  
10  
11 assesses the effect of FCTC ratification on implementing tobacco taxes by analyzing changes in  
12  
13 tax rate using the WHO MPOWER standard and cigarette affordability. In addition, we assess  
14  
15 the role of state capacity and previous tax and price levels<sup>14 15</sup> on taxes in 2014.  
16  
17  
18

## 19 METHODS

### 20 Data

21  
22 We obtained data on the tobacco tax rate, including specific excise, ad valorem excise,  
23  
24 import duties, value added tax, other taxes from the World Health Organization Report on the  
25  
26 Global Tobacco Epidemic 2015 public dataset for 2007, 2010, 2012 and 2014.<sup>16</sup> This dataset  
27  
28 includes information collected by WHO in-country experts as of 31 December 2014 on the prices  
29  
30 of the most-sold brand of cigarettes (both in local currency and in US dollars) and cigarette  
31  
32 taxes. (Because WHO did not report tax data for Syria in 2014 we used the data from 2012 for  
33  
34 2014.) In countries where different taxes applied to cigarettes based on length, quantity  
35  
36 produced, or type (e.g., filter vs. non-filter), the rate that applied to the most popular brand was  
37  
38 used in the calculation of tax rate.  
39  
40  
41  
42  
43

44 We obtained baseline pre-FCTC taxes using the 1999 World Bank (WB) survey of 64  
45  
46 countries that reported the share of cigarette taxes (including VAT) as a percentage of the retail  
47  
48 price of a pack of cigarettes<sup>17</sup> supplemented by the tobacco industry's International Tobacco  
49  
50 Documentation Centre's<sup>18</sup> 1998 *International Fiscal Guide to Tobacco* that mapped international  
51  
52 taxation, price and tariff policies.<sup>19</sup>  
53  
54  
55  
56  
57  
58  
59  
60

1  
2  
3 Tobacco tax rate is the portion of the price represented by all taxes including VAT for the  
4 most-sold brand of cigarettes, is our outcome variable. We studied two outcome variables  
5 derived from WHO MPOWER standards in the *WHO Report on the Global Tobacco Epidemic*  
6 *2015: Raising Taxes on Tobacco*: (1) taxes that totaled at least 75% of retail price, the highest  
7 MPOWER standard<sup>5</sup>, and (2) taxes that totaled at least 50% of retail price, the second highest  
8 standard.<sup>5</sup> FCTC Article 6 does not set any targets on tobacco prices. The expectation in FCTC  
9 and WHO MPOWER program the government is that if the manufacturers increase wholesale  
10 prices so that the overall tax rate drops below 75% or 50%, the government would increase taxes  
11 so that the tax share would go above 75% or 50%.  
12  
13  
14  
15  
16  
17  
18  
19  
20  
21  
22  
23

24 To analyze the income level of the countries we used World Bank 2016 gross national  
25 income (GNI) categories:<sup>20</sup> low-income countries were defined as those with a GNI per capita of  
26 \$1,045 or less in 2014; middle-income economies, \$1,046 to \$12,735; high income, \$12,736 or  
27 more. Lower-middle-income and upper-middle-income economies were separated at a GNI per  
28 capita of \$4,125. Since our sample included only eight low-income countries, we combined low  
29 income and lower middle-income categories in the statistical analysis. We used information on  
30 cigarette prices expressed in nominal US dollars in 1998/1999.  
31  
32  
33  
34  
35  
36  
37  
38  
39

40 We analyzed the effect of FCTC on affordability of cigarettes by using the fraction of per  
41 capita gross domestic product (GDP) that would be needed to buy 100 packs of the most sold  
42 cigarette brand. This method is a more comprehensive and representative measure of income  
43 across countries in different income levels than, for example surveys of wages.<sup>21</sup> We used price  
44 data described above and World Bank data for GDP per capita for 1999 and 2014.<sup>20</sup> We used the  
45 growth of GDP per capita from 1999 to 2014<sup>20</sup> ( $[(2014 \text{ GDP} - 1999 \text{ GDP}) / 1999 \text{ GDP}]$ , GDP  
46 expressed in 2014 US dollars) as additional independent variable on the assumption that  
47  
48  
49  
50  
51  
52  
53  
54  
55  
56  
57  
58  
59  
60



1  
2  
3 cigarettes would be more affordable in 2014 among those countries where the rise in income  
4 level is the fastest. We assume that changes in GDP over the 16-year period reflect changes in  
5 disposable income.  
6  
7  
8

### 9 10 **Other Variables**

11  
12 To study the willingness and ability of states to implement public policies we used  
13 Marshall and Cole's<sup>22</sup> state fragility index. This index scores all countries with population above  
14 500,000 in four performance dimensions: security, political, economic, and social. The index  
15 gives higher scores for more fragile countries. (Sudan scored 23 while the 15 most stable  
16 countries scored 0.) We averaged scores for 2007, 2010 and in 2013 to test whether more fragile  
17 countries were less likely to have high tobacco taxes in 2014.  
18  
19  
20  
21  
22  
23  
24  
25

26 We study the effect of previous tax and price levels on tax rate in 2014 with two  
27 variables, tobacco tax rates in 1998/1999 and price of most sold cigarette packs in US dollars in  
28 1998/1999. We test whether countries with higher cigarette taxes and higher price cigarettes in  
29 1998/1999 are more likely to have high tax rates in 2014.  
30  
31  
32  
33  
34

### 35 **Statistical Analysis**

36  
37 Logistic regression was used in separate analyses with 75% and 50% tax rates in 2014 as  
38 the outcome variable. We studied the effect of FCTC by calculating the number of years since  
39 FCTC ratification as of 2014. We set years since ratification to 0 for countries that ratified the  
40 FCTC in 2014 (El Salvador, Ethiopia and Zimbabwe), had signed but not ratified the FCTC as of  
41 the end of 2014 (Argentina, Cuba, Haiti, Morocco, Mozambique, Switzerland and the United  
42 States), or had not signed or become parties to the FCTC by January 2016 (Andorra, Dominican  
43 Republic, Eritrea, Indonesia, Liechtenstein, Malawi, Monaco, Somalia). Countries that already  
44  
45  
46  
47  
48  
49  
50  
51  
52  
53  
54  
55  
56  
57  
58  
59  
60

1  
2  
3 had a tax rate of 50% (final sample used N=44) or 75% (N=88) in 1998/1999 were excluded  
4  
5 from the analysis.  
6

7  
8 Our analysis has 80% statistical power (with  $\alpha=.05$ ) to detect an OR by a factor of 1.25  
9  
10 (or 0.80) associated with FCTC ratification.  
11

12 We also used logistic regression to analyze the effect of the FCTC on cigarette  
13  
14 affordability by assigning a value of 1 for those countries where cigarettes were less affordable  
15  
16 in 2014 than in 1999 and 0 where cigarettes were more affordable. We tested interaction between  
17  
18 state capacity and FCTC ratification to see if more fragile countries were slower in ratifying  
19  
20 FCTC. We also ran a sensitivity analysis to test if cigarettes are less affordable in countries with  
21  
22 extensive tobacco control measures.  
23  
24

25  
26 We used R functions `glm` and `minEffect.VSMc.logistic` from `powerMediation` for the  
27  
28 analysis.  
29

## 30 31 RESULTS

32  
33 Tobacco tax rates have not uniformly increased from 1998/1999 to 2014 as shown in  
34  
35 Figure 1 where the countries are ranked by their tax rate in 1998/1999. The average tax rate  
36  
37 increased from 53% of the price of the most sold cigarette brands in 1998/1999 to 58% in 2014.  
38  
39 In those fifteen years 69 countries increased the tobacco tax rate, 33 decreased it, and one  
40  
41 country (Austria) had the same tax rate.  
42  
43

44  
45 In 1998/1999 only 8 (18%) of high-income, 2 (8%; Brazil and Costa Rica) upper-  
46  
47 middle-income, one lower-middle-income country (4%, Sri Lanka), and none of the low-income  
48  
49 countries had a tax that was above 75% of the retail price (Table 1). By 2014, 44% of high-  
50  
51 income countries had taxes above 75% of retail value. The progress was slow among higher- and  
52  
53  
54  
55  
56  
57

lower-middle-income countries with just one additional country complying in each income category and no low-income country.

In 1998/1999 37 (82%) of high-income countries had taxes that comprised above 50% of retail price, while only 11 (46%) of higher-middle-income countries, 9 (35%) of lower-middle - income countries, and two (23%) low-income country had that tax rate. By 2014 39 (87%) of high-income countries had taxes above 50% of retail price, as did 16 (67%) of upper-middle - income countries, 13 (50%) of lower-middle-income countries, and 1 (13%) low-income country (Zimbabwe).

| Tobacco tax > 75% (high) |                     |                         |                                 | Tobacco tax > 50%   |                         |                                 |
|--------------------------|---------------------|-------------------------|---------------------------------|---------------------|-------------------------|---------------------------------|
|                          | Compliant countries | Non-compliant countries | Fraction of compliant countries | Compliant countries | Non-compliant countries | Fraction of compliant countries |
| High-income              |                     |                         |                                 |                     |                         |                                 |
| 1998/1999                | 8                   | 37                      | 18%                             | 37                  | 8                       | 82%                             |
| 2014                     | 20                  | 25                      | 44%                             | 39                  | 7                       | 87%                             |
| Upper-middle-income      |                     |                         |                                 |                     |                         |                                 |
| 1998/1999                | 2                   | 22                      | 8%                              | 11                  | 13                      | 46%                             |
| 2014                     | 3                   | 21                      | 13%                             | 16                  | 8                       | 67%                             |
| Lower-middle-income      |                     |                         |                                 |                     |                         |                                 |
| 1998/1999                | 1                   | 25                      | 4%                              | 9                   | 17                      | 35%                             |
| 2014                     | 1                   | 25                      | 4%                              | 13                  | 13                      | 50%                             |
| Low-income               |                     |                         |                                 |                     |                         |                                 |
| 1998/1999                | 0                   | 8                       | 0%                              | 2                   | 6                       | 23%                             |

|      |   |   |    |   |   |     |
|------|---|---|----|---|---|-----|
| 2014 | 0 | 8 | 0% | 1 | 7 | 13% |
|------|---|---|----|---|---|-----|

The logistic regression showed that time since FCTC ratification was not associated with implementing high tobacco taxes (Table 2). More fragile countries were less likely to have 75% and 50% tobacco tax rates in 2014. Countries with higher cigarette prices in 1998/1999 were more likely to have 75% tax rates in 2014. Countries with higher tax rates in 1998/1999 were more likely than countries with lower tax rates in 1998/1999 to have 75% tobacco tax rates in 2014. To test overall effects, we calculated a linear regression model for all countries in our sample with tax rates in 2014 as the dependent variable and FCTC ratification, tax rate in 1999, price in 1999 and state capacity as independent variables ( $R^2 = 0.48$ ). FCTC ratification and price were not statistically significant ( $P > 0.7$  and  $P > 0.3$  respectively). The coefficients for tax rate in 1999 were 0.40 ( $p < 0.001$ ) and for state capacity -1.58 ( $p < 0.001$ ). The variance inflation factors in the first model ranged from 1.08 to 1.68 and in the second model from 1.04 to 1.12, well below the threshold for multicollinearity concern.

As sensitivity analysis, we also ran OLS regression with tax rate in 2014 as dependent variable for the whole sample. We used the same independent variables as in logit analysis. Tax rate in 1999 was positively associated with tax rate in 2014 (coeff. 0.41,  $p = 0.0003$ ) and lack of state capacity was negatively associated with tax in 2014 (coeff. -1.52,  $p = 0.00001$ ). The results were essentially the same as the main logit analysis

**Table 2. Odds of passing high standard tobacco taxes by 2014 (among non-compliant countries in 1998/1999)**

|  | Tobacco tax $\geq$ 75% of retail price (high) | Tobacco tax $\geq$ 50% of retail price |
|--|-----------------------------------------------|----------------------------------------|
|  |                                               |                                        |

| Variable                                                                                  | Odds ratio | 95% CI      | Odds ratio | 95% CI      |
|-------------------------------------------------------------------------------------------|------------|-------------|------------|-------------|
| Years since FCTC ratification                                                             | 1.04       | (0.81-1.43) | 0.94       | (0.76-1.15) |
| Tax rate in 1998/1999                                                                     | 1.07*      | (1.00-1.14) | 1.01       | (0.94-1.08) |
| Price in 1998/1999                                                                        | 0.31*      | (0.10-0.73) | 0.78       | (0.22-2.78) |
| State capacity                                                                            | 0.67**     | (0.49-0.83) | 0.86*      | (0.74-0.99) |
| Number of countries (observations)                                                        | 88         |             | 62         |             |
| * $P \leq 0.05$ , ** $P \leq 0.01$ , Numbers in parentheses are 95% confidence intervals. |            |             |            |             |

There were large differences in affordability of cigarettes across countries in both 1999 and 2014 (Figure 2). In 2014 less than one percent of per capita GDP was required to buy 100 packs of the most sold cigarette brands in Luxembourg, while in Tanzania the corresponding figure was 24.6% (28.9% in 1999). Cigarettes become less affordable between 1999 and 2014 in 51 countries and more affordable in 40 countries. Cigarettes had become less affordable in 73% of high-income countries (27/37), 61% of upper-middle-income countries (14/23) and 31% of lower-middle- and low-income countries (10/32). Ratifying the FCTC earlier was associated with cigarettes becoming less affordable in 2014 (Table 3). Cigarettes became more affordable in countries with high rates of per capita GDP growth between 1999 and 2014. Lack of state capacity was associated with lower odds for having less affordable cigarettes. The variance inflation factors ranged from 1.04 to 1.10, indicating no multicollinearity problems.

As sensitivity analysis, we also ran OLS regression with cigarette affordability in 2014 as dependent variable for the whole sample. We used the same independent variables as in logit analysis. The direction of association was again similar as in logit analysis. Ratifying the FCTC earlier was positively associated with cigarettes becoming less affordable in 2014 (coeff.0.04, p=0.03), while GDP growth (coeff.-0.10, p=0.001) and lack of state capacity (coeff.-0.02, p=0.001) were negatively associated with having less affordable cigarettes.

| Table 3. Odds of cigarettes being less affordable by 2014                     |            |             |
|-------------------------------------------------------------------------------|------------|-------------|
| Variable                                                                      | Odds ratio | 95% CI      |
| Years since FCTC ratification                                                 | 1.23*      | (1.02-1.50) |
| GDP per capita growth from 1999 to 2014                                       | 0.48**     | (0.28-0.75) |
| State capacity                                                                | 0.90*      | (0.82-0.99) |
| Number of countries (observations)                                            | 91         |             |
| * P ≤ 0.05, ** P ≤ 0.01, Numbers in parentheses are 95% confidence intervals. |            |             |

## DISCUSSION

Our results confirm earlier findings showing slow progress of implementing high tobacco taxes among low- and middle-income countries.<sup>5 23</sup> Likewise, our results support concerns<sup>5</sup> that FCTC Article 6 has not, in general, led countries to implement high tobacco taxes. Lack of success can be partly attributed to state fragility. More fragile countries in terms of security, political, economic, and social development may not have administrative and technical capacity to implement high tobacco taxes.<sup>24-27</sup> We did not detect an interaction between state capacity and time since FCTC ratification, which indicates that weak state capacity as such may not prevent

1  
2  
3 countries from ratifying FCTC. Promoting the FCTC should include strengthening of the basic  
4 functions of government.<sup>28 29</sup>  
5  
6

7  
8 Countries with higher tax rates in 1998/1999 were more likely to have at least a 75% tax  
9 rate in 2014. Increasing tobacco taxes requires determined action from governments. Countries  
10 that had higher taxes for tobacco before the FCTC continued to do so also after ratifying it. The  
11 results indicate a path-dependency in tobacco taxation policies.<sup>30-32</sup> The passing of tobacco tax  
12 policies is a contingent event that sets into motion institutional patterns that have deterministic  
13 properties.<sup>33</sup> The result emphasizes the importance of intensifying efforts to implement high  
14 tobacco taxes especially in countries with originally low tax rates.  
15  
16  
17  
18  
19  
20  
21  
22

23  
24 Surprisingly, lower, not higher, cigarette prices in 1998/1999 were associated with 75%  
25 tobacco tax rates in 2014 (Table 2). This association may reflect a ceiling effect where  
26 governments are reluctant to increase tobacco taxes if the cigarettes are already relatively  
27 expensive. This could also result from tobacco industry lobbying.<sup>5-8</sup> FCTC Article 6 and its  
28 implementation guidelines expressly emphasize health goals in determining tobacco taxation but  
29 governments may try to maintain popular support through avoiding large tobacco tax increases.  
30 It is also possible that that it is easier for a country to reach the 75% tax rate if the price was low  
31 before the tax increase.  
32  
33  
34  
35  
36  
37  
38  
39  
40  
41

42  
43 Consistent with earlier studies on cigarette affordability, despite tax increases cigarettes  
44 were more affordable in 2014 than in 1999.<sup>21 34 35</sup> World Health Organization, 2015 #960} Our  
45 paper includes data that were collected well after 2010, so we are able base our analysis on a  
46 longer time horizon than these earlier analyses and thereby confirm well-established trend in  
47 cigarette affordability. Countries that ratified FCTC earlier on average had less affordable  
48 cigarettes in 2014. The results seem to contradict the earlier finding of the non-significant effect  
49  
50  
51  
52  
53  
54  
55  
56  
57  
58  
59  
60

1  
2  
3 of FCTC ratification on having high cigarette taxes. It may well be that the FCTC prompted  
4 countries to increase tobacco taxes but not enough to obtain 50% or 75% tax rates. It is also  
5 possible that countries with already high tax rates were more likely to ratify FCTC earlier. If we  
6 include tobacco tax rates in 1999 into the model, FCTC ratification remains statistically  
7 significant.  
8  
9

10  
11  
12  
13  
14  
15 There are many different ways that one could define an “effective” tax rate, including  
16 70% tax rate as specified in the WHO Technical Manual on Tobacco Tax Administration (1).  
17 The WHO MPOWER set a target of 75% of price. Because this is a paper on the effect that the  
18 FCTC had on tax policy, we used the WHO’s own standard of success as defined in MPOWER.  
19 The WHO MPOWER measures for effective tax rates are arbitrary and different measures could  
20 be also used.  
21  
22  
23  
24  
25  
26  
27

28  
29 Our results emphasize the role of economic development in preventing cigarettes  
30 becoming less affordable. If incomes rise quickly, cigarettes become more affordable even if  
31 taxes are kept constant.<sup>5 21</sup> This development is reflected in our result where rapid per capita  
32 GDP growth between 1999 and 2014 was associated with having more affordable cigarettes in  
33 2014. Among those 14 countries where the per capita GDP increased more than 300% in 15  
34 years, cigarettes were less affordable in just three countries. In fact, the weakness of set tobacco  
35 tax rate targets, for example 50% of retail price, is that they do not take into account the effect of  
36 rising incomes or the industry pricing behavior. Keeping other factors constant the demand for  
37 cigarettes generally increases with the average level of income, especially in developing  
38 countries.<sup>21</sup>  
39  
40  
41  
42  
43  
44  
45  
46  
47  
48  
49  
50

51  
52 Lack of state capacity was associated with both lower odds for having high tobacco taxes  
53 and less affordable cigarettes. Tobacco taxes are low and cigarettes are affordable in more fragile  
54  
55  
56  
57



1  
2  
3 countries, while taxes are high and cigarettes less affordable in more stable countries. The  
4  
5 multinational tobacco companies are currently targeting emerging economies in Asia and Africa  
6  
7 with young populations and relatively low smoking prevalence, especially among women.<sup>36</sup>  
8  
9

10 The tax provisions in the FCTC are not binding.<sup>3</sup> The unwillingness of states to commit  
11  
12 to minimum tax levels during the negotiations is reflected in their lack of subsequent action.<sup>37</sup>  
13  
14 FCTC Guidelines for Article 6 implementation recommend that Parties should take into account  
15  
16 “both price elasticity and income elasticity of demand, as well as inflation and changes in  
17  
18 household income, to make tobacco products less affordable over time in order to reduce  
19  
20 consumption and prevalence.”<sup>3</sup> Our results demonstrate that the current policies for  
21  
22 implementing tobacco taxes fail to meet this recommendation.  
23  
24  
25

26 In our sample cigarettes became more affordable from 1999 to 2014. Taking the FCTC  
27  
28 Guideline recommendation seriously would entail the Conference of the FCTC Parties assigning  
29  
30 definite targets not only for tobacco tax rates but also for measures to prevent tobacco products  
31  
32 becoming more affordable.  
33  
34

35 The effect of cigarettes becoming more affordable with rapid income rises can be  
36  
37 prevented by adopting adequate policy rules.<sup>34 35 38</sup> One example is a tax escalator which is  
38  
39 adjusted to income growth or an equivalent variable that takes into account increases in  
40  
41 consumer purchasing power.<sup>5</sup> Such a tax escalator is already in place in UK.<sup>39</sup> With  
42  
43 automatically increasing tobacco taxes by the increase in purchasing power the tobacco  
44  
45 companies would increase prices, which would prevent tobacco products not becoming more  
46  
47 affordable. To allow this process to take place tobacco taxes rates could, at least temporarily, rise  
48  
49 even above the 75% standard.  
50  
51  
52

### 53 **Limitations**

54  
55  
56  
57

1  
2  
3 Assessing the change in tax as a share of price over time can be complicated.<sup>16</sup>  
4

5 Determination of tax rates as a proportion of total cigarette retail price is dependent on changes  
6  
7 in tax rates but also on changes in wholesale prices. Consequently, despite an increase in the tax  
8  
9 on cigarettes, the share of excise and total taxes in the retail price could remain the same or  
10  
11 shrink depending on how the tobacco companies respond to the tax increase. Similarly, the share  
12  
13 of taxes in the final retail price might increase, even if there is no change in the tax levied on a  
14  
15 pack of cigarettes.  
16  
17

18  
19 To establish a baseline before FCTC we used tobacco tax and price data from two  
20  
21 different sources, World Bank survey from 1999<sup>17</sup> and the International Tobacco Documentation  
22  
23 Centre's<sup>18</sup> 1998 *International Fiscal Guide to Tobacco*. Both data sources include information  
24  
25 on retail price of the most-sold cigarette brand. The high correlation (0.947) for overlapping  
26  
27 price information indicated the data was collected in substantially uniform manner. The  
28  
29 correlation for tax data was lower, 0.676). This lower correlation could indicate a measurement  
30  
31 error in the datasets or it could indicate that tobacco taxes increased from 1998 to 1999 more  
32  
33 dramatically than cigarette prices. We deemed the World Bank survey more reliable than the  
34  
35 *International Fiscal Guide to Tobacco* produced by the tobacco industry. We focused on the  
36  
37 price and tax for the most-sold cigarette brand on all data sources including WHO data for  
38  
39 2014,<sup>16</sup> but were unable to confirm that definitions remained stable over time. The most-sold  
40  
41 cigarette may not fully describe the effect of tobacco taxation to tobacco consumption. We did  
42  
43 not analyze the tax structure. Our outcome variable, the share of all tobacco taxes of the most  
44  
45 sold brand, does not fully capture the role of taxes in reducing demand for tobacco. Earlier  
46  
47 research has shown the tobacco industry may simultaneously absorb the tax increases on its  
48  
49 cheapest brands while over-shifting taxes on premium brands.<sup>9</sup> The higher the level of the excise  
50  
51  
52  
53  
54  
55  
56  
57  
58  
59  
60

1  
2  
3 and other taxes the less room for tobacco industry price differentiation strategies. We were not  
4  
5 able to analyze how countries' tax policies have accounted for country-specific price and income  
6  
7 elasticities.  
8  
9

10 Our analysis focused only on cigarettes ignoring other categories of tobacco products,  
11  
12 some of which (for example bidi) are more prevalent in more fragile countries. Since we had  
13  
14 data only from two time points we were not able to assess trends in tax, price and affordability in  
15  
16 prior periods.  
17  
18

## 19 **Conclusions**

20  
21 In contrast to advertising restrictions,<sup>30 32</sup> health warning labels,<sup>30</sup> and smokefree  
22  
23 environments,<sup>31</sup> FCTC ratification has not been systematically followed with higher tobacco  
24  
25 taxation. Fragile countries are less likely to have high tobacco taxes. Rapid rise in incomes  
26  
27 undermines the effectiveness of tobacco taxes. Guidelines for FCTC Article 6 implementation  
28  
29 should assign definite targets for tobacco taxes and for the implementation of a tax escalator that  
30  
31 gradually increases taxes to match the rising level of incomes. The tobacco control community  
32  
33 should intensify efforts to help more fragile countries to improve performance in FCTC  
34  
35 implementation both through strengthening their administrative and technical capacity and  
36  
37 through supporting the basic functions of government. The FCTC Conference of the Parties  
38  
39 should assign definite targets not only for tobacco tax rates but also for measures to prevent  
40  
41 tobacco products becoming more affordable.  
42  
43  
44  
45

## 46 **FUNDING**

47  
48  
49 This work was supported by National Cancer Institute grant CA-087472. The funding  
50  
51 agency played no role in the conduct of the research or preparation of the manuscript.  
52  
53

## 54 **COMPETING INTERESTS**

1  
2  
3 There are no competing interests.  
4

5 **CONTRIBUTORSHIP**  
6

7 HH developed the idea for this study and carried out the data collection. HH and SG  
8 carried out the data analysis and wrote and revised the manuscript.  
9  
10  
11

12 **DATA SHARING STATEMENT**  
13

14 Statistical code and dataset available upon request from corresponding author.  
15  
16  
17  
18  
19  
20  
21  
22  
23  
24  
25  
26  
27  
28  
29  
30  
31  
32  
33  
34  
35  
36  
37  
38  
39  
40  
41  
42  
43  
44  
45  
46  
47  
48  
49  
50  
51  
52  
53  
54  
55  
56  
57  
58  
59  
60

1  
2  
3  
4  
5  
6  
7  
8  
9  
10  
11  
12  
13  
14  
15  
16  
17  
18  
19  
20  
21  
22  
23  
24  
25  
26  
27  
28  
29  
30  
31  
32  
33  
34  
35  
36  
37  
38  
39  
40  
41  
42  
43  
44  
45  
46  
47  
48  
49  
50  
51  
52  
53  
54  
55  
56  
57  
58  
59  
60

**REFERENCES**

For peer review only

## FIGURE CAPTIONS

Figure 1. Tobacco tax rates in 1998/1999 and 2014 as percent of retail price.

Figure 2. Shares of price of 100 cigarette packs of Gross Domestic Product per Capita in 1999 and 2014 as percent of retail price.

1. World Health Organization. WHO technical manual on tobacco tax administration. Geneva, 2010.
2. International Agency for Research on Cancer. IARC handbooks of cancer prevention: tobacco control. Volume 14: effectiveness of tax and price policies for tobacco control Lyon, France: IARC; 2011 [
3. World Health Organization. Framework Convention on Tobacco Control. Geneva 2003.
4. FCTC/COP/6/7. Guidelines for implementation of Article 6 of the WHO FCTC 2014.
5. World Health Organization. WHO Report on the Global Tobacco Epidemic 2015: Raising taxes on tobacco. Geneva: World Health Organization, 2015.
6. Campbell RB, Balbach ED. Cigarette Excise Taxes in Context: Cautionary Lessons from the U.S. Experience. *Int J Health Serv* 2015;45(3):564-77. doi: 10.1177/0020731415584553
7. Campbell RB, Balbach ED. Building alliances in unlikely places: progressive allies and the Tobacco Institute's coalition strategy on cigarette excise taxes. *Am J Public Health* 2009;99(7):1188-96. doi: 10.2105/AJPH.2008.143131
8. Smith KE, Savell E, Gilmore AB. What is known about tobacco industry efforts to influence tobacco tax? A systematic review of empirical studies. *Tob Control* 2013;22(2):144-53. doi: 10.1136/tobaccocontrol-2011-050098
9. Gilmore AB, Tavakoly B, Taylor G, et al. Understanding tobacco industry pricing strategy and whether it undermines tobacco tax policy: the example of the UK cigarette market. *Addiction* 2013;108(7):1317-26. doi: 10.1111/add.12159
10. Chaloupka FJ, Cummings KM, Morley CP, et al. Tax, price and cigarette smoking: evidence from the tobacco documents and implications for tobacco company marketing strategies. *Tob Control* 2002;11 Suppl 1:162-72.
11. Brock B, Choi K, Boyle RG, et al. Tobacco product prices before and after a statewide tobacco tax increase. *Tob Control* 2016;25(2):166-73. doi: 10.1136/tobaccocontrol-2014-052018
12. Alamar B, Mahmoud L, Glantz SA. Cigarette Smuggling in California: Fact and Fiction. Tobacco Control Policy Making: United States. San Francisco: Center for Tobacco Control Research and Education, UC San Francisco, 2003.
13. Hirono KT, Smith KE. Australia's \$40 per pack cigarette tax plans: the need to consider equity. *Tob Control* 2017 doi: 10.1136/tobaccocontrol-2016-053608
14. David PA. Clio and the Economics of QWERTY. *The American Economic Review* 1985;75(2):332-37.
15. Hiilamo H, Glantz SA. Implementation of effective cigarette health warning labels among low and middle income countries: state capacity, path-dependency and tobacco industry activity. *Soc Sci Med* 2015;124:241-5. doi: 10.1016/j.socscimed.2014.11.054
16. World Health Organization. WHO report on the global tobacco epidemic 2015, dataset. Geneva, 2015.

17. Yurekli A, de Beye J. Design and administer tobacco taxes. World Bank economics of tobacco toolkit ; no. 4. design and administration. Washington D.C.: World Bank, 1999.
18. McDaniel PA, Intinarelli G, Malone RE. Tobacco industry issues management organizations: creating a global corporate network to undermine public health. *Global Health* 2008;4:2. doi: 1744-8603-4-2 [pii]  
10.1186/1744-8603-4-2 [published Online First: 2008/01/19]
19. International Tobacco Documentation Centre. International fiscal guide to tobacco. World taxation, price, tariff and regulatory information. Philip Morris, 1998:2074330579-1410.
20. World Bank. Country and Lending Groups., 2016.
21. Blecher E, van Walbeek C. An Analysis of Cigarette Affordability. Paris: International Union Against Tuberculosis and Lung Disease, 2008.
22. Marshall MG, Cole BR. Global Report 2014. Conflict, Governance and State Fragility. : Center for Systemic Peace 2014 [Available from: <http://www.systemicpeace.org/SFI/matrix2010c.pdf> accessed 31 Jan 2014.
23. World Health Organization. 2014 global progress report on implementation of the WHO Framework Convention on Tobacco Control, 2014.
24. Crosbie E, Sebie EM, Glantz SA. Tobacco industry success in Costa Rica: the importance of FCTC article 5.3. *Salud Publica Mex* 2012;54(1):28-38. doi: S0036-36342012000100005 [pii] [published Online First: 2012/01/31]
25. Crosbie E, Sosa P, Glantz SA. Costa Rica's implementation of the Framework Convention on Tobacco Control: Overcoming decades of industry dominance. *Salud Publica Mex* 2016;58(1):62-70.
26. Crosbie E, Sosa P, Glantz SA. Defending strong tobacco packaging and labelling regulations in Uruguay: transnational tobacco control network versus Philip Morris International. *Tob Control* 2017 doi: 10.1136/tobaccocontrol-2017-053690
27. Crosbie E, Sosa P, Glantz SA. The importance of continued engagement during the implementation phase of tobacco control policies in a middle-income country: the case of Costa Rica. *Tob Control* 2017;26(1):60-68. doi: 10.1136/tobaccocontrol-2015-052701
28. Bump JB, Reich MR. Political economy analysis for tobacco control in low- and middle-income countries. *Health Policy Plan* 2013;28(2):123-33. doi: czs049 [pii]  
10.1093/heapol/czs049 [published Online First: 2012/05/16]
29. Leischow SJ, Ayo-Yusuf O, Backinger CL. Converging research needs across framework convention on tobacco control articles: making research relevant to global tobacco control practice and policy. *Nicotine Tob Res* 2012;15(4):761-6. doi: nts199 [pii]  
10.1093/ntr/nts199 [published Online First: 2012/09/20]
30. Sanders-Jackson AN, Song AV, Hiilamo H, et al. Effect of the Framework Convention on Tobacco Control and voluntary industry health warning labels on passage of mandated cigarette warning labels from 1965 to 2012: transition probability and event history analyses. *Am J Public Health* 2013;103(11):2041-7. doi: 10.2105/AJPH.2013.301324 [published Online First: 2013/09/14]
31. Uang R, Hiilamo H, Glantz SA. Accelerated Adoption of Smoke-Free Laws After Ratification of the World Health Organization Framework Convention on Tobacco Control. *Am J Public Health* 2016;106(1):166-71. doi: 10.2105/AJPH.2015.302872
32. Hiilamo H, Glantz S. FCTC followed by accelerated implementation of tobacco advertising bans. *Tob Control* 2016 doi: 10.1136/tobaccocontrol-2016-053007
33. Mahoney J. Path Dependence in Historical Sociology. *Theory and Society* 2000;29:507-48.

- 1  
2  
3 34. Blecher E. Targeting the affordability of cigarettes: a new benchmark for taxation policy in low-  
4 income and-middle-income countries. *Tob Control* 2010;19(4):325-30. doi:  
5 10.1136/tc.2009.030155  
6  
7 35. Blecher E, Ross H, Leon ME. Cigarette affordability in Europe. *Tob Control* 2013;22(4):e6. doi:  
8 10.1136/tobaccocontrol-2012-050575  
9  
10 36. Gilmore AB, Fooks G, Drope J, et al. Exposing and addressing tobacco industry conduct in low-income  
11 and middle-income countries. *Lancet* 2015;385(9972):1029-43. doi: 10.1016/S0140-  
12 6736(15)60312-9  
13  
14 37. Wipfli H. The Global War on Tobacco. Mapping the World's First Public Health Treaty. Baltimore:  
15 Johns Hopkins University Press 2016.  
16  
17 38. Blecher E, Ross H, Stoklosa M. Lessons learned from cigarette tax harmonisation in the European  
18 Union. *Tob Control* 2014;23(e1):e12-4. doi: 10.1136/tobaccocontrol-2012-050728  
19  
20 39. Campaign for Tobacco-Free Kids. Tobacco tax success story: United Kingdom. Washington, 2012.  
21  
22  
23  
24  
25  
26  
27  
28  
29  
30  
31  
32  
33  
34  
35  
36  
37  
38  
39  
40  
41  
42  
43  
44  
45  
46  
47  
48  
49  
50  
51  
52  
53  
54  
55  
56  
57  
58  
59  
60



1  
2  
3  
4  
5  
6  
7  
8  
9  
10  
11  
12  
13  
14  
15  
16  
17  
18  
19  
20  
21  
22  
23  
24  
25  
26  
27  
28  
29  
30  
31  
32  
33  
34  
35  
36  
37  
38  
39  
40  
41  
42  
43  
44  
45  
46  
47  
48  
49  
50  
51  
52  
53  
54  
55  
56  
57  
58  
59  
60

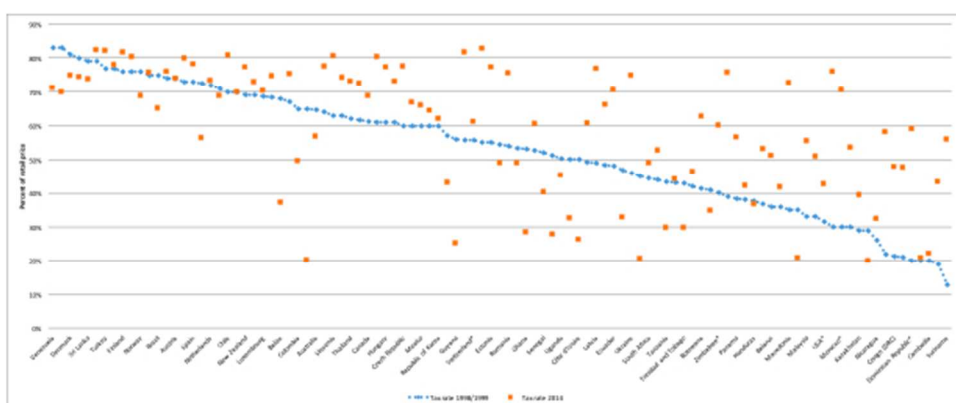

Figure 1. Tobacco tax rates in 1998/1999 and 2014 as percent of retail price.

226x99mm (72 x 72 DPI)

Peer review only

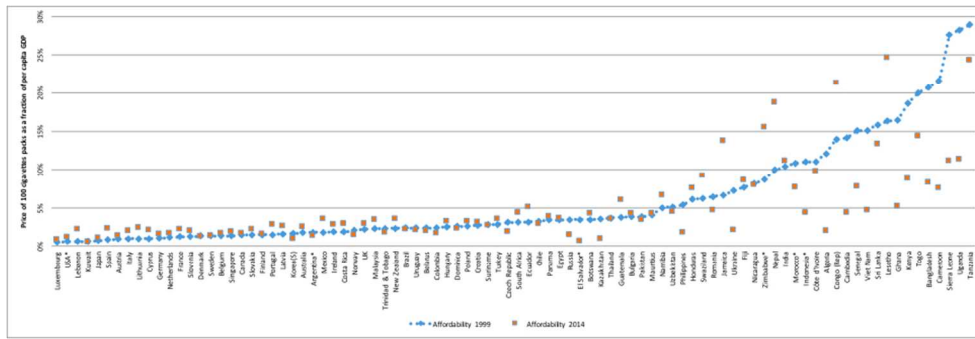

Figure 2. Shares of price of 100 cigarette packs of Gross Domestic Product per Capita in 1999 and 2014 as percent of retail price.

348x124mm (72 x 72 DPI)

Peer review only

# BMJ Open

## LIMITED IMPLEMENTATION OF THE FRAMEWORK CONVENTION ON TOBACCO CONTROL'S TOBACCO TAX PROVISION: GLOBAL COMPARISON

|                                 |                                                                                                                                                                                                                                                                                                                                                                                                                                         |
|---------------------------------|-----------------------------------------------------------------------------------------------------------------------------------------------------------------------------------------------------------------------------------------------------------------------------------------------------------------------------------------------------------------------------------------------------------------------------------------|
| Journal:                        | <i>BMJ Open</i>                                                                                                                                                                                                                                                                                                                                                                                                                         |
| Manuscript ID                   | bmjopen-2017-021340.R1                                                                                                                                                                                                                                                                                                                                                                                                                  |
| Article Type:                   | Research                                                                                                                                                                                                                                                                                                                                                                                                                                |
| Date Submitted by the Author:   | 06-Apr-2018                                                                                                                                                                                                                                                                                                                                                                                                                             |
| Complete List of Authors:       | Hiilamo, Heikki; University of Helsinki, Department of Social Research, social and public policy; VID Specialized University, Oslo, Norway , •Faculty of Theology, Diaconia and Leadership Studies<br>Glantz, S; University of California, San Francisco, Center for Tobacco Control Research and Education, Philip R. Lee Institute for Health Policy Studies, Helen Diller Family Comprehensive Cancer Center, Department of Medicine |
| <b>Primary Subject Heading</b>: | Smoking and tobacco                                                                                                                                                                                                                                                                                                                                                                                                                     |
| Secondary Subject Heading:      | Global health                                                                                                                                                                                                                                                                                                                                                                                                                           |
| Keywords:                       | tobacco industry, tobacco taxation, FCTC                                                                                                                                                                                                                                                                                                                                                                                                |
|                                 |                                                                                                                                                                                                                                                                                                                                                                                                                                         |

SCHOLARONE™  
Manuscripts

Only

1  
2  
3 **LIMITED IMPLEMENTATION OF THE FRAMEWORK CONVENTION ON**  
4  
5 **TOBACCO CONTROL'S TOBACCO TAX PROVISION: GLOBAL COMPARISON**  
6  
7  
8  
9  
10

11  
12 Heikki Hiilamo<sup>ab</sup>, PhD  
13

14 Stanton Glantz<sup>c</sup>, PhD  
15

16  
17 <sup>a</sup> VID Specialized University, Oslo, Norway

18 <sup>b</sup> Social and public policy, Department of Social Research, 00014 University of Helsinki,  
19 Finland, [heikki.hiilamo@helsinki.fi](mailto:heikki.hiilamo@helsinki.fi)

20 <sup>c</sup>Center for Tobacco Control Research and Education, Philip R. Lee Institute for Health Policy  
21 Studies, Helen Diller Family Comprehensive Cancer Center, Department of Medicine  
22 University of California San Francisco, San Francisco, CA 94143-1390, [stanton.glantz@ucsf.edu](mailto:stanton.glantz@ucsf.edu)  
23  
24  
25  
26

27 Corresponding Author:  
28 Heikki Hiilamo, Professor  
29 University of Helsinki  
30 Department of Social Research  
31 Snellmaninkatu 10  
32 00014 Helsingin yliopisto  
33 Finland  
34 Tel. +358403587203  
35 Fax. +358294124835  
36 [heikki.hiilamo@helsinki.fi](mailto:heikki.hiilamo@helsinki.fi)  
37  
38  
39

40 Word count 3425  
41  
42  
43  
44  
45  
46  
47  
48  
49  
50  
51  
52  
53  
54  
55  
56  
57  
58  
59  
60

## ABSTRACT

**OBJECTIVE:** To quantify changes in tobacco tax rates and cigarette affordability after countries ratified the WHO Framework Convention on Tobacco Control (FCTC) using with the World Health Organization MPOWER standards. .

**METHODS:** We used logistic regression to assess the association of FCTC ratification with adoption of at least 50% and 75% (high) of retail price tobacco tax rates for the most sold brands in countries, accounting for years since ratification and other covariates. We also compared cigarette affordability in 2014 to 1999.

**RESULTS:** By 2014, 44% of high-income countries had taxes above 75% of retail value compared to 18% in 1998/1999. In fifteen years 69 countries increased the tobacco tax rate, 33 decreased it, and a1 had the same tax rate. FCTC ratification was not associated with implementing high tobacco taxes. More fragile countries in terms of security, political, economic, and social development were less likely to have at least 50% and 75% tobacco tax rates in 2014 compared with 1999. The higher the cigarette prices in 1999 the less likely the countries were to have at least 75% tobacco tax rates in 2014. However, cigarettes were less affordable in 2014 than in 1999 in countries that had ratified FCTC earlier.

**CONCLUSIONS:** Despite widespread FCTC ratification, implementing higher tobacco taxes remains incomplete. Guidelines for FCTC Article 6 implementation should assign definite targets for tobacco taxes and for implementation of a tax escalator that gradually increases taxes to match rising income levels. Fragile countries are less likely to have high tobacco taxes and less affordable cigarettes. The tobacco control community should intensify efforts to help fragile countries improve performance in FCTC implementation both through strengthening their administrative and technical capacity and through supporting basic functions of government.

### WHAT THIS PAPER ADDS

- Tobacco taxes can effectively reduce tobacco use, but FCTC ratification was not associated with implementing high tobacco taxes.
- Compared with 1999 cigarettes were more affordable in 2014. However, in countries that had ratified FCTC earlier cigarettes were less affordable.
- Guidelines for FCTC Article 6 implementation should assign specific minimum targets for tobacco taxes and for implementation of a tax escalator that gradually increased taxes to match raising income levels.

## INTRODUCTION

Raising tobacco taxes is an effective strategy to reduce tobacco use<sup>1-3</sup>. On average a 10% price increase will reduce tobacco use by 4% in high income countries and by 5% among low- and middle-income countries.<sup>4</sup> Article 6 of the World Health Organization (WHO) Framework Convention on Tobacco Control<sup>5</sup> (FCTC) commits parties to implement “tax policies and, where appropriate, price policies, on tobacco products so as to contribute to the health objectives aimed at reducing tobacco consumption.”<sup>5</sup> Article 6 implementation guidelines<sup>6</sup> recommend tax policies which take into account tobacco products’ price elasticity (the rate by which tobacco consumption decreases as result of price increases) and income elasticity (the sensitivity of tobacco consumption to income changes) to make tobacco products less affordable over time, but does not set specific targets for taxes or prices.

Tobacco industry tactics to block tax increases have a major influence on tax rates and industry responses to tax increases have a major effect cigarette prices. Tobacco taxes are politically difficult to raise because tobacco companies fight tax increases<sup>2</sup> by commissioning research claiming economic benefits of tobacco, creating alliances,<sup>7</sup> including with progressive organizations,<sup>8</sup> lobbying ministries of finance with poor knowledge of public health and FCTC requirements,<sup>9</sup> and arguing tax increases drive illicit trade<sup>2</sup> and hurt disadvantaged groups.<sup>8 10 11</sup> They also learned how to cope with tax increases and sometimes actually benefit from them by overshifting taxes on premium brands to increase profits while downshifting taxes on ultra-low-price brands to cushion the effects of tax increases on total consumption.<sup>12-15</sup> Even a series of substantial tax increases, such as in Australia<sup>16</sup>, may not increase tax rate if the industry keeps overshifting tax increases to prices. In this sense, tax rates can be a relatively poor indicator of cigarette prices.

1  
2  
3 WHO established the MPOWER measures in 2008 to scale up key FCTC demand  
4  
5 reduction measures including tobacco taxes. MPOWER emphasizes that “increasing the price of  
6  
7 tobacco through higher taxes is the single most effective way to encourage tobacco users to quit  
8  
9 and prevent children from starting to smoke.”<sup>2</sup> A key finding of the 2015 MPOWER report was  
10  
11 that taxes were the least implemented MPOWER measure with only 10% of the world’s  
12  
13 population (living in 33 countries) covered by taxes of at least 75% of retail price<sup>2</sup>. This paper  
14  
15 assesses the association of FCTC ratification with implementing tobacco taxes by analyzing  
16  
17 changes in tax rate using the WHO MPOWER standard and cigarette affordability. In addition,  
18  
19 we assess the role of state capacity and previous tax and price levels<sup>17 18</sup> on taxes in 2014.  
20  
21  
22  
23

## 24 **METHODS**

### 25 **Data**

26  
27 Data on the tobacco tax rate, including specific excise, ad valorem excise, import duties,  
28  
29 value added tax, and other taxes were obtained from the World Health Organization Report on  
30  
31 the Global Tobacco Epidemic 2015 public dataset for 2014.<sup>19</sup> This dataset includes information  
32  
33 collected by WHO in-country experts as of 31 December 2014 on the prices of the most-sold  
34  
35 brand of cigarettes (both in local currency and in US dollars) and cigarette taxes. Information on  
36  
37 the taxation of cigarettes (and when possible, most commonly used tobacco products) was  
38  
39 collected from ministries of finance. (Because WHO did not report tax data for Syria in 2014 we  
40  
41 used the data from 2012 for 2014.) In countries where different taxes applied to cigarettes based  
42  
43 on length, quantity produced, or type (e.g., filter vs. non-filter), the rate that applied to the most  
44  
45 popular brand was used to calculate the tax rate.  
46  
47  
48  
49  
50

51 We obtained baseline pre-FCTC taxes using the 1999 World Bank (WB) survey of 64  
52  
53 countries that reported the share of cigarette taxes (including value added tax, VAT) as a  
54  
55  
56  
57



percentage of the retail price of a pack of cigarettes<sup>20</sup> supplemented by the tobacco industry's International Tobacco Documentation Centre's<sup>21</sup> 1998 *International Fiscal Guide to Tobacco* that mapped international taxation, price and tariff policies.<sup>22</sup>

Tobacco tax rate is the portion of the price represented by all taxes (including VAT for the most-sold brand of cigarettes, is our outcome variable. We studied two outcome variables derived from WHO MPOWER standards in the *WHO Report on the Global Tobacco Epidemic 2015: Raising Taxes on Tobacco*: (1) taxes that totaled at least 75% of retail price, the highest MPOWER standard<sup>2</sup>, and (2) taxes that totaled at least 50% of retail price, the second highest standard.<sup>2</sup> FCTC Article 6 does not set targets on tobacco prices. The expectation in FCTC and WHO MPOWER is that if the manufacturers increase wholesale prices so that the overall tax rate drops below 75% or 50%, the government would increase taxes so that the tax share would go above 75% or 50%.

To analyze the income level of the countries we used World Bank (WB) 2016 gross national income (GNI) categories:<sup>23</sup> low-income countries were defined as those with a GNI per capita of \$1,045 or less in 2014; middle-income economies, \$1,046 to \$12,735; high income, \$12,736 or more. Lower-middle-income and upper-middle-income economies were separated at a GNI per capita of \$4,125. Since our sample included only eight low-income countries, after cross tabulation analysis we combined low income and lower middle-income categories in the regression analysis. We used information on cigarette prices expressed in nominal US dollars in 1998/1999.

We analyzed the association of FCTC with affordability of cigarettes by using the fraction of per capita gross domestic product (GDP) that would be needed to buy 100 packs of the most sold cigarette brand. This method is a more comprehensive and representative measure

1  
2  
3 of income across countries in different income levels than, for example surveys of wages.<sup>24</sup>We  
4 used price data described above and World Bank data for GDP per capita for 1999 and 2014.<sup>23</sup> In  
5  
6 addition, we used the growth of GDP per capita from 1999 to 2014<sup>23</sup> ( $[2014 \text{ GDP} - 1999$   
7  
8 GDP]/1999 GDP, GDP expressed in 2014 US dollars) as an independent variable on the  
9  
10 assumption that cigarettes would be more affordable in 2014 among those countries where the  
11  
12 rise in income level was the fastest. We assume that changes in GDP over the 16-year period  
13  
14 reflect changes in disposable income.  
15  
16  
17

### 18 19 **Other Variables**

20  
21 To study the willingness and ability of states to implement public policies we used  
22  
23 Marshall and Cole's<sup>25</sup> state fragility index. This index scores all countries with population above  
24  
25 500,000 in four performance dimensions: security, political, economic, and social. Previous  
26  
27 literature has shown that state fragility matters for implementing effective cigarette health  
28  
29 warnings.<sup>17 18</sup> The index gives higher scores for more fragile countries (Sudan scored 23 while  
30  
31 the 15 most stable countries scored 0) but does not place countries into different categories. We  
32  
33 averaged scores for 2007, 2010 and in 2013 to test whether more fragile countries were less  
34  
35 likely to have high tobacco taxes in 2014. By more fragile countries we refer to those countries  
36  
37 in the which score higher than others using Marshall and Cole's state fragility index.  
38  
39  
40  
41

42 We study the role of previous tax and price levels on tax rate in 2014 with two variables,  
43  
44 tobacco tax rates in 1998/1999 and price of most sold cigarette packs in US dollars in 1998/1999.  
45  
46 We test whether countries with higher cigarette taxes and higher price cigarettes in 1998/1999  
47  
48 are more likely to have high tax rates in 2014.  
49  
50

### 51 **Statistical Analysis**

1  
2  
3 Logistic regression was used in separate analyses with 75% and 50% tax rates in 2014 as  
4 the outcome variable. We studied the effect of FCTC by calculating the number of years since  
5 FCTC ratification as of 2014. We set years since ratification to 0 for countries that ratified the  
6 FCTC in 2014 (El Salvador, Ethiopia and Zimbabwe), had signed but not ratified the FCTC as of  
7 the end of 2014 (Argentina, Cuba, Haiti, Morocco, Mozambique, Switzerland and the United  
8 States), or had not signed or become parties to the FCTC by January 2016 (Andorra, Dominican  
9 Republic, Eritrea, Indonesia, Liechtenstein, Malawi, Monaco, Somalia). Countries that already  
10 had a tax rate of 50% (final sample used N=44) or 75% (N=88) in 1998/1999 were excluded  
11 from the analysis.  
12  
13  
14  
15  
16  
17  
18  
19  
20  
21  
22

23  
24 Our analysis has 80% statistical power (with  $\alpha=.05$ ) to detect an OR by a factor of 1.25  
25 (or 0.80) associated with FCTC ratification.  
26  
27

28 We also used logistic regression to analyze the effect of the FCTC on cigarette  
29 affordability by assigning a value of 1 for those countries where cigarettes were less affordable  
30 in 2014 than in 1999 and 0 where cigarettes were more affordable. We tested interaction between  
31 state capacity and FCTC ratification to see if more fragile countries were slower in ratifying  
32 FCTC. We also ran a sensitivity analysis to test if cigarettes are less affordable in countries with  
33 extensive tobacco control measures.  
34  
35  
36  
37  
38  
39  
40  
41

42 We used R functions `glm` and `minEffect.VSMc.logistic` from `powerMediation` for the  
43 analysis.  
44  
45

#### 46 **Patient and Public Involvement**

47 Patients or public were not involved in the study.  
48  
49

#### 50 **RESULTS**

Tobacco tax rates have not uniformly increased from 1998/1999 to 2014 as shown in Figure 1 where the countries are ranked by their tax rate in 1998/1999. The average tax rate increased from 53% of the price of the most sold cigarette brands in 1998/1999 to 58% in 2014. In those fifteen years 69 countries increased the tobacco tax rate, 33 decreased it (30 FCTC ratifying countries), and one country (Austria) had the same tax rate.

In 1998/1999 only 8 (18%) of high-income, 2 (8%; Brazil and Costa Rica) upper-middle-income, one lower-middle-income country (4%, Sri Lanka), and none of the low-income countries had a tax above 75% of the retail price (Table 1). By 2014, 44% of high-income countries had taxes above 75% of retail value. The progress was slow among higher- and lower-middle-income countries with just one additional country complying in each income category and no low-income country.

In 1998/1999 37 (82%) of high-income countries had taxes that comprised above 50% of retail price, while only 11 (46%) of higher-middle-income countries, 9 (35%) of lower-middle-income countries, and two (23%) low-income country had that tax rate. By 2014 39 (87%) of high-income countries had taxes above 50% of retail price, as did 16 (67%) of upper-middle - income countries, 13 (50%) of lower-middle-income countries, and 1 (13%) low-income country (Zimbabwe).

| <b>Table 1. Countries with 75% and 50% tobacco tax rates in 1998/1999 and 2014 by income group</b> |     |    |                       |                   |    |                       |
|----------------------------------------------------------------------------------------------------|-----|----|-----------------------|-------------------|----|-----------------------|
| Tobacco tax > 75% (high)                                                                           |     |    |                       | Tobacco tax > 50% |    |                       |
|                                                                                                    | Yes | No | Fraction of countries | Yes               | No | Fraction of countries |
| High-income                                                                                        |     |    |                       |                   |    |                       |

|                                                                                                                                                                                                                                                                                                                                                                                                                                                                                                                                                                                                                                                                                                                                                                                                                                                                                                                                                                  |    |    |     |    |    |     |
|------------------------------------------------------------------------------------------------------------------------------------------------------------------------------------------------------------------------------------------------------------------------------------------------------------------------------------------------------------------------------------------------------------------------------------------------------------------------------------------------------------------------------------------------------------------------------------------------------------------------------------------------------------------------------------------------------------------------------------------------------------------------------------------------------------------------------------------------------------------------------------------------------------------------------------------------------------------|----|----|-----|----|----|-----|
| 1998/1999                                                                                                                                                                                                                                                                                                                                                                                                                                                                                                                                                                                                                                                                                                                                                                                                                                                                                                                                                        | 8  | 37 | 18% | 37 | 8  | 82% |
| 2014                                                                                                                                                                                                                                                                                                                                                                                                                                                                                                                                                                                                                                                                                                                                                                                                                                                                                                                                                             | 20 | 25 | 44% | 39 | 7  | 87% |
| Upper-middle-income                                                                                                                                                                                                                                                                                                                                                                                                                                                                                                                                                                                                                                                                                                                                                                                                                                                                                                                                              |    |    |     |    |    |     |
| 1998/1999                                                                                                                                                                                                                                                                                                                                                                                                                                                                                                                                                                                                                                                                                                                                                                                                                                                                                                                                                        | 2  | 22 | 8%  | 11 | 13 | 46% |
| 2014                                                                                                                                                                                                                                                                                                                                                                                                                                                                                                                                                                                                                                                                                                                                                                                                                                                                                                                                                             | 3  | 21 | 13% | 16 | 8  | 67% |
| Lower-middle-income                                                                                                                                                                                                                                                                                                                                                                                                                                                                                                                                                                                                                                                                                                                                                                                                                                                                                                                                              |    |    |     |    |    |     |
| 1998/1999                                                                                                                                                                                                                                                                                                                                                                                                                                                                                                                                                                                                                                                                                                                                                                                                                                                                                                                                                        | 1  | 25 | 4%  | 9  | 17 | 35% |
| 2014                                                                                                                                                                                                                                                                                                                                                                                                                                                                                                                                                                                                                                                                                                                                                                                                                                                                                                                                                             | 1  | 25 | 4%  | 13 | 13 | 50% |
| Low-income                                                                                                                                                                                                                                                                                                                                                                                                                                                                                                                                                                                                                                                                                                                                                                                                                                                                                                                                                       |    |    |     |    |    |     |
| 1998/1999                                                                                                                                                                                                                                                                                                                                                                                                                                                                                                                                                                                                                                                                                                                                                                                                                                                                                                                                                        | 0  | 8  | 0%  | 2  | 6  | 23% |
| 2014                                                                                                                                                                                                                                                                                                                                                                                                                                                                                                                                                                                                                                                                                                                                                                                                                                                                                                                                                             | 0  | 8  | 0%  | 1  | 7  | 13% |
| <p>45 countries changed WB status during the observation period. The following countries changed from low-income countries to lower-middle income countries: Bangladesh, Cambodia, Cameroon, Côte d'Ivoire, Ghana, Honduras, India, Kenya, Lesotho, Nicaragua, Nigeria, Pakistan and Vietnam. The following countries changed from lower-middle income countries to upper-middle income countries: Algeria, Belarus, Belize, Bulgaria, Columbia, Costa Rica, Dominican Republic, Ecuador, Fiji, Guyana, Jamaica, Kazakhstan, Macedonia, Namibia, Panama, Romania, Russia, Suriname and Thailand. The following countries changed from upper-middle-income countries to high income countries: Barbados, Chile, Czech Republic, Estonia, Hungary, Malta, Poland, Republic of Korea, Slovakia, Trinidad and Tobago and Uruguay. Latvia and Lithuania changed from lower-income countries to high-income countries. No country changed to a lower income group.</p> |    |    |     |    |    |     |

The logistic regression showed that time since FCTC ratification was not associated with implementing high tobacco taxes (Table 2). More fragile countries were less likely to have 75% and 50% tobacco tax rates in 2014. Countries with higher cigarette prices in 1998/1999 were more likely to have 75% tax rates in 2014. Countries with higher tax rates in 1998/1999 were more likely than countries with lower tax rates in 1998/1999 to have 75% tobacco tax rates in

2014. To test overall effects we calculated a linear regression model for all countries in our sample with tax rates in 2014 as the dependent variable and FCTC ratification, tax rate in 1999, price in 1999 and state capacity as independent variables ( $R^2 = 0.48$ ). FCTC ratification and price were not statistically significant ( $P > 0.7$  and  $P > 0.3$  respectively). The coefficients for tax rate in 1999 were 0.40 ( $p < 0.001$ ) and for state capacity -1.58 ( $p < 0.001$ ). The variance inflation factors in the first model ranged from 1.08 to 1.68 and in the second model from 1.04 to 1.12, well below the threshold for multicollinearity concern.

As a sensitivity analysis, we also ran OLS regression with actual tax rate in 2014 as the dependent variable for the whole sample. We used the same independent variables as in logit analysis. Tax rate in 1999 was positively associated with tax rate in 2014 (coeff. 0.41,  $p = 0.0003$ ) and lack of state capacity was negatively associated with tax in 2014 (coeff. -1.52,  $p = 0.00001$ ). The results were essentially the same as the logistic regression analysis.

| <b>Table 2. Odds of passing high standard tobacco taxes by 2014 (among non-compliant countries in 1998/1999)</b> |                                               |             |                                        |             |
|------------------------------------------------------------------------------------------------------------------|-----------------------------------------------|-------------|----------------------------------------|-------------|
|                                                                                                                  | Tobacco tax $\geq$ 75% of retail price (high) |             | Tobacco tax $\geq$ 50% of retail price |             |
| Variable                                                                                                         | Odds ratio                                    | 95% CI      | Odds ratio                             | 95% CI      |
| Years since FCTC ratification                                                                                    | 1.04                                          | (0.81-1.43) | 0.94                                   | (0.76-1.15) |
| Tax rate in 1998/1999                                                                                            | 1.07*                                         | (1.00-1.14) | 1.01                                   | (0.94-1.08) |
| Price in 1998/1999                                                                                               | 0.31*                                         | (0.10-0.73) | 0.78                                   | (0.22-2.78) |
| State capacity                                                                                                   | 0.67**                                        | (0.49-0.83) | 0.86*                                  | (0.74-0.99) |

|                                                                                           |    |  |    |  |
|-------------------------------------------------------------------------------------------|----|--|----|--|
|                                                                                           |    |  |    |  |
| Number of countries (observations)                                                        | 88 |  | 62 |  |
| * $P \leq 0.05$ , ** $P \leq 0.01$ , Numbers in parentheses are 95% confidence intervals. |    |  |    |  |

There were large differences in affordability of cigarettes across countries in both 1999 and 2014 (Figure 2). At the lower end of the range, in 2014 less than one percent of per capita GDP was required to buy 100 packs of the most sold cigarette brands in Luxembourg, while at the upper end in Tanzania the corresponding figure was 24.6% (28.9% in 1999). Cigarettes became less affordable between 1999 and 2014 in 51 countries and more affordable in 40 countries. Cigarettes had become less affordable in 73% of high-income countries (27/37), 61% of upper-middle-income countries (14/23) and 31% of lower-middle- and low-income countries (10/32). Ratifying the FCTC earlier was associated with cigarettes becoming less affordable in 2014 implying perhaps that countries with affordable cigarette prices in 1999 were quicker to ratify the FCTC and implement its tax provision (Table 3). Cigarettes became more affordable in countries with high rates of per capita GDP growth between 1999 and 2014. Lack of state capacity was associated with lower odds for having less affordable cigarettes. The variance inflation factors ranged from 1.04 to 1.10, indicating no multicollinearity problems.

As a sensitivity analysis, we also ran OLS regression with cigarette affordability in 2014 as the dependent variable for the whole sample. We used the same independent variables as in logit analysis. The direction of association was again similar as in logit analysis. Ratifying the FCTC earlier was positively associated with cigarettes becoming less affordable in 2014 (coeff.0.04,  $p=0.03$ ), while GDP growth (coeff.-0.10,  $p=0.001$ ) and lack of state capacity (coeff.-0.02,  $p=0.001$ ) were negatively associated with having less affordable cigarettes.

**Table 3. Odds of cigarettes being less affordable by 2014**

| Variable                                | Odds ratio | 95% CI      |
|-----------------------------------------|------------|-------------|
| Years since FCTC ratification           | 1.23*      | (1.02-1.50) |
| GDP per capita growth from 1999 to 2014 | 0.48**     | (0.28-0.75) |
| State capacity                          | 0.90*      | (0.82-0.99) |
| Number of countries (observations)      | 91         |             |

\*  $P \leq 0.05$ , \*\*  $P \leq 0.01$ , Numbers in parentheses are 95% confidence intervals.

## DISCUSSION

Our results confirm earlier findings showing slow progress in meeting the 75% or 50% tobacco tax rate targets among low- and middle-income countries.<sup>2 26</sup> Likewise, our results support concerns<sup>2</sup> that FCTC Article 6 has not, in general, led countries to implement high tobacco taxes. Lack of success can be partly attributed to state fragility. More fragile countries in terms of security, political, economic, and social development may not have administrative and technical capacity to implement high tobacco taxes.<sup>27-30</sup> We did not detect an interaction between state capacity and time since FCTC ratification, which indicates that weak state capacity as such may not prevent countries from ratifying FCTC. Promoting the FCTC should include strengthening of the basic functions of government.<sup>31 32</sup>

Countries with higher tax rates in 1998/1999 were more likely to have at least a 75% tax rate in 2014. Increasing tobacco taxes requires determined action from governments. Countries that had higher tobacco taxes before the FCTC continued to do so also after ratifying it. The results indicate a path-dependency in tobacco taxation policies.<sup>33-35</sup> The passing of tobacco tax



1  
2  
3 policies is a contingent event that sets into motion institutional patterns that have deterministic  
4 properties.<sup>36</sup> The result emphasizes the importance of intensifying efforts to implement high  
5 tobacco taxes especially in countries with originally low tax rates.  
6  
7  
8  
9

10 Surprisingly, lower, not higher, cigarette prices in 1998/1999 were associated with 75%  
11 tobacco tax rates in 2014 (Table 2). Countries with low cigarette prices in 1998/1999 may have  
12 reached the target with regular inflationary adjustments. This association may also reflect a  
13 possible ceiling effect where governments are reluctant to increase tobacco taxes if the cigarettes  
14 are already relatively expensive. This could also result from tobacco industry lobbying.<sup>2 7-9</sup>  
15 FCTC Article 6 and its implementation guidelines expressly emphasize health goals in  
16 determining tobacco taxation but governments may try to maintain popular support through  
17 adopting small tobacco tax increases instead of large increases. It is also possible that that it is  
18 easier for a country to reach the 75% tax rate if the price was low before the tax increase.  
19  
20  
21  
22  
23  
24  
25  
26  
27  
28  
29

30 Consistent with earlier studies on cigarette affordability, cigarettes were more affordable  
31 in 2014 than in 1999 despite tax increases.<sup>24 37 38</sup> World Health Organization, 2015 #960} Our  
32 paper includes data collected well after 2010, so we were able base our analysis on a longer time  
33 horizon than earlier analyses and thereby confirm well-established trend in cigarette  
34 affordability. Countries that ratified FCTC earlier on average had less affordable cigarettes in  
35 2014. The results seem to contradict the earlier finding of the non-significant association of  
36 FCTC ratification with having high cigarette taxes. It may well be that the FCTC prompted  
37 countries to increase tobacco taxes but not enough to obtain 50% or 75% tax rates. It is also  
38 possible that countries with already high tax rates were more likely to ratify FCTC earlier. If we  
39 include 199 tobacco tax rates in the model, FCTC ratification remains statistically significant.  
40  
41  
42  
43  
44  
45  
46  
47  
48  
49  
50  
51  
52  
53  
54  
55  
56  
57  
58  
59  
60

1  
2  
3 There are many different ways that one could define an “effective” tax rate, including  
4  
5 70% tax rate as specified in the WHO Technical Manual on Tobacco Tax Administration (1).  
6  
7 The WHO MPOWER set a target of 75% of price. Because this is a paper on the effect that the  
8  
9 FCTC had on tax policy, we used the WHO’s own standard of success as defined in MPOWER.  
10  
11 The WHO MPOWER measures for effective tax rates are arbitrary and different measures could  
12  
13 be also used.  
14  
15

16  
17 Our results emphasize the role of economic development in preventing cigarettes from  
18  
19 becoming less affordable. If incomes rise quickly, cigarettes become more affordable even if  
20  
21 taxes are kept constant.<sup>24</sup> This development is reflected in our result where rapid per capita  
22  
23 GDP growth between 1999 and 2014 was associated with more affordable cigarettes in 2014.  
24  
25 Among those 14 countries where the per capita GDP increased more than 300% in 15 years,  
26  
27 cigarettes were less affordable in just three countries. In fact, the weakness of set tobacco tax rate  
28  
29 targets, for example 50% of retail price, is that they do not take into account the effect of rising  
30  
31 incomes or industry pricing behavior. Keeping other factors constant the demand for cigarettes  
32  
33 generally increases with the average level of income, especially in developing countries.<sup>24</sup>  
34  
35  
36

37  
38 Lack of state capacity was associated with both lower odds of having high tobacco taxes  
39  
40 and less affordable cigarettes. Tobacco taxes are low and cigarettes are affordable in more fragile  
41  
42 countries, while taxes are high and cigarettes less affordable in more stable countries. As of  
43  
44 2018, the multinational tobacco companies were targeting countries in Asia and Africa with  
45  
46 young populations and relatively low smoking prevalence, especially among women.<sup>39</sup>  
47  
48

49  
50 The tax provisions in the FCTC do not include specific tax targets.<sup>5</sup> The unwillingness of  
51  
52 states to commit to minimum tax levels during FCTC negotiations is reflected in their lack of  
53  
54 subsequent action.<sup>40</sup> FCTC Guidelines for Article 6 implementation recommend that Parties  
55  
56  
57

1  
2  
3 should take into account “both price elasticity and income elasticity of demand, as well as  
4  
5 inflation and changes in household income, to make tobacco products less affordable over time  
6  
7 in order to reduce consumption and prevalence.”<sup>5</sup> Our results demonstrate that current policies  
8  
9 for implementing tobacco taxes fail to meet this recommendation.  
10  
11

12 In our sample cigarettes became more affordable from 1999 to 2014. Taking the FCTC  
13  
14 Guideline recommendation seriously would entail the Conference of the FCTC Parties assigning  
15  
16 definite targets not only for tobacco tax rates but also for measures that prevent tobacco products  
17  
18 from becoming more affordable.  
19  
20

21 The effect of cigarettes becoming more affordable with rapid income rises can be  
22  
23 prevented by adopting adequate policies.<sup>37 38 41</sup> One example is a tax escalator which is adjusted  
24  
25 to income growth or an equivalent variable that accounts for increases in consumer purchasing  
26  
27 power.<sup>2</sup> Such a tax escalator is already in place in the UK.<sup>42</sup> With automatically increasing  
28  
29 tobacco taxes by the increase in purchasing power the tobacco companies would increase prices,  
30  
31 which would prevent tobacco products not becoming more affordable. To allow this process to  
32  
33 take place tobacco taxes rates could, at least temporarily, rise even above the 75% standard.  
34  
35 Another option is to set a tax for each brand guaranteeing a 75% tax for every product. Doing so  
36  
37 would make it more difficult for tobacco companies to downshift tax increases.  
38  
39  
40  
41

## 42 **Limitations**

43  
44 Assessing the change in tax as a share of price over time can be complicated.<sup>19</sup>  
45  
46 Determination of tax rates as a proportion of total cigarette retail price is dependent on changes  
47  
48 in tax rates but also on changes in wholesale prices. Consequently, despite an increase in the tax  
49  
50 on cigarettes, the share of excise and total taxes in the retail price could remain the same or  
51  
52 shrink depending on how the tobacco companies respond to the tax increase. Similarly, the share  
53  
54  
55  
56  
57  
58  
59  
60

1  
2  
3 of taxes in the final retail price might increase, even if there is no change in the tax levied on a  
4 pack of cigarettes. The FCTC might have prompted countries to increase tobacco taxes but not  
5  
6 enough, given that the FCTC did not specify 50/75% tax rates as a requirement.  
7  
8  
9

10 To establish a baseline before FCTC we used tobacco tax and price data from two  
11 different sources, World Bank survey from 1999<sup>20</sup> and the International Tobacco Documentation  
12 Centre's<sup>21</sup> 1998 *International Fiscal Guide to Tobacco*. Both data sources include information  
13  
14 on retail price of the most-sold cigarette brand. The high correlation (0.947) for overlapping  
15 price information indicates the data was collected in a substantially uniform manner. The  
16 correlation for tax data was lower, 0.676). This lower correlation could indicate a measurement  
17 error in the datasets or it could indicate that tobacco taxes increased from 1998 to 1999 more  
18 dramatically than cigarette prices. Given the more reliable international standing we deemed the  
19 World Bank survey more reliable than the *International Fiscal Guide to Tobacco* produced by  
20 the tobacco industry. We focused on the price and tax for the most-sold cigarette brand on all  
21 data sources including WHO data for 2014,<sup>19</sup> but were unable to confirm that definitions  
22 remained stable over time. The most-sold cigarette may not fully describe the effect of tobacco  
23 taxation to tobacco consumption. We did not analyze the tax structure. Our outcome variable, the  
24 share of all tobacco taxes of the most sold brand, does not fully capture the role of taxes in  
25 reducing demand for tobacco. Earlier research has shown the tobacco industry may  
26 simultaneously absorb the tax increases on its cheapest brands while over-shifting taxes on  
27 premium brands.<sup>12</sup> The higher the level of the excise and other taxes the less room for tobacco  
28 industry price differentiation strategies. We were not able to analyze how countries' tax policies  
29 have accounted for country-specific price and income elasticities.  
30  
31  
32  
33  
34  
35  
36  
37  
38  
39  
40  
41  
42  
43  
44  
45  
46  
47  
48  
49  
50  
51  
52  
53  
54  
55  
56  
57  
58  
59  
60

1  
2  
3 In this study we were not able to assess the causal effects. Besides the variables used in  
4 this study other factors such as economic cycles, political leadership and tobacco control activity  
5 outside of FCTC may have affected the outcome variables.  
6  
7  
8

9  
10 Our analysis focused only on cigarettes ignoring other categories of tobacco products,  
11 some of which (for example bidi) are more prevalent in more fragile countries such as  
12 Bangladesh and India<sup>43</sup>. Since we had data only from two time points we were not able to assess  
13 trends in tax, price and affordability in prior periods.  
14  
15  
16  
17

## 18 **Conclusions**

19  
20 In contrast to advertising restrictions,<sup>33 35</sup> health warning labels,<sup>33</sup> and smokefree  
21 environments,<sup>34</sup> FCTC ratification has not been systematically followed regarding higher  
22 tobacco taxation. FCTC Article 6 does not stipulate specific tax rates. MPOWER tax rate targets  
23 were not introduced before 2008. The more specific FCTC Articles 8, 11 and 13 discuss smoke  
24 free environments, health warnings and advertising bans that fall into domain of health  
25 government, while Article 6 concerns financial policy, which falls under finance ministries.  
26 There need to be further efforts to increase financial ministries' knowledge of and responsibility  
27 to implement Article 6. Fragile countries are less likely to have high tobacco taxes. Rapid rise in  
28 incomes undermines the effectiveness of tobacco taxes. Guidelines for FCTC Article 6  
29 implementation should assign definite targets for tobacco taxes and for the implementation of a  
30 tax escalator that gradually increases taxes to match the rising income levels. The tobacco  
31 control community should intensify efforts to help more fragile countries to improve  
32 performance in FCTC implementation both through strengthening their administrative and  
33 technical capacity and through supporting the basic functions of government. The FCTC  
34  
35  
36  
37  
38  
39  
40  
41  
42  
43  
44  
45  
46  
47  
48  
49  
50  
51  
52  
53  
54  
55  
56  
57  
58  
59  
60

1  
2  
3 Conference of the Parties should assign definite targets not only for tobacco tax rates but also for  
4  
5 measures to prevent tobacco products from becoming more affordable.  
6

## 7 8 **FUNDING** 9

10 This work was supported by National Cancer Institute grant CA-087472. The funding  
11  
12 agency played no role in the conduct of the research or preparation of the manuscript.  
13

## 14 15 **COMPETING INTERESTS** 16

17 There are no competing interests.  
18

## 19 20 **CONTRIBUTORSHIP** 21

22 HH developed the idea for this study and carried out the data collection. HH and SG  
23  
24 carried out the data analysis and wrote and revised the manuscript.  
25

## 26 27 **DATA SHARING STATEMENT** 28

29 No data is shared since we are using data which is already made public.  
30  
31  
32  
33  
34  
35  
36  
37  
38  
39  
40  
41  
42  
43  
44  
45  
46  
47  
48  
49  
50  
51  
52  
53  
54  
55  
56  
57  
58  
59  
60

## REFERENCES

1. World Health Organization. WHO technical manual on tobacco tax administration. Geneva, 2010.
2. World Health Organization. WHO Report on the Global Tobacco Epidemic 2015: Raising taxes on tobacco. Geneva: World Health Organization, 2015.
3. Jha P, Chaloupka FJ. The economics of global tobacco control. *BMJ* 2000;321(7257):358-61.
4. International Agency for Research on Cancer. IARC handbooks of cancer prevention: tobacco control. Volume 14: effectiveness of tax and price policies for tobacco control Lyon, France: IARC; 2011 [
5. World Health Organization. Framework Convention on Tobacco Control. Geneva 2003.
6. FCTC/COP/6/7. Guidelines for implementation of Article 6 of the WHO FCTC 2014.
7. Campbell RB, Balbach ED. Cigarette Excise Taxes in Context: Cautionary Lessons from the U.S. Experience. *Int J Health Serv* 2015;45(3):564-77. doi: 10.1177/0020731415584553
8. Campbell RB, Balbach ED. Building alliances in unlikely places: progressive allies and the Tobacco Institute's coalition strategy on cigarette excise taxes. *Am J Public Health* 2009;99(7):1188-96. doi: 10.2105/AJPH.2008.143131
9. Smith KE, Savell E, Gilmore AB. What is known about tobacco industry efforts to influence tobacco tax? A systematic review of empirical studies. *Tob Control* 2013;22(2):144-53. doi: 10.1136/tobaccocontrol-2011-050098
10. Campbell R, Balbach ED. Mobilising public opinion for the tobacco industry: the Consumer Tax Alliance and excise taxes. *Tob Control* 2008;17(5):351-6. doi: 10.1136/tc.2008.025338

- 1  
2  
3 11. Koch SF. Quasi-experimental evidence on tobacco tax regressivity. *Soc Sci Med*  
4  
5 2018;196:19-28. doi: 10.1016/j.socscimed.2017.11.004  
6
- 7  
8 12. Gilmore AB, Tavakoly B, Taylor G, et al. Understanding tobacco industry pricing strategy  
9  
10 and whether it undermines tobacco tax policy: the example of the UK cigarette market.  
11  
12 *Addiction* 2013;108(7):1317-26. doi: 10.1111/add.12159  
13
- 14  
15 13. Chaloupka FJ, Cummings KM, Morley CP, et al. Tax, price and cigarette smoking: evidence  
16  
17 from the tobacco documents and implications for tobacco company marketing strategies.  
18  
19 *Tob Control* 2002;11 Suppl 1:I62-72.  
20
- 21  
22 14. Brock B, Choi K, Boyle RG, et al. Tobacco product prices before and after a statewide  
23  
24 tobacco tax increase. *Tob Control* 2016;25(2):166-73. doi: 10.1136/tobaccocontrol-2014-  
25  
26 052018  
27
- 28  
29 15. Alamar B, Mahmoud L, Glantz SA. Cigarette Smuggling in California: Fact and Fiction.  
30  
31 Tobacco Control Policy Making: United States. San Francisco: Center for Tobacco  
32  
33 Control Research and Education, UC San Francisco, 2003.  
34
- 35  
36 16. Hirono KT, Smith KE. Australia's \$40 per pack cigarette tax plans: the need to consider  
37  
38 equity. *Tob Control* 2017 doi: 10.1136/tobaccocontrol-2016-053608  
39
- 40  
41 17. David PA. Clio and the Economics of QWERTY. *The American Economic Review*  
42  
43 1985;75(2):332-37.  
44
- 45  
46 18. Hiilamo H, Glantz SA. Implementation of effective cigarette health warning labels among  
47  
48 low and middle income countries: state capacity, path-dependency and tobacco industry  
49  
50 activity. *Soc Sci Med* 2015;124:241-5. doi: 10.1016/j.socscimed.2014.11.054  
51
- 52  
53 19. World Health Organization. WHO report on the global tobacco epidemic 2015, dataset.  
54  
55 Geneva, 2015.  
56  
57



- 1  
2  
3 20. Yurekli A, de Beye J. Design and administer tobacco taxes. World Bank economics of  
4 tobacco toolkit ; no. 4. design and administration. Washington D.C.: World Bank, 1999.  
5  
6  
7  
8 21. McDaniel PA, Intinarelli G, Malone RE. Tobacco industry issues management organizations:  
9 creating a global corporate network to undermine public health. *Global Health* 2008;4:2.  
10  
11  
12  
13  
14  
15  
16 10.1186/1744-8603-4-2 [published Online First: 2008/01/19]  
17  
18 22. International Tobacco Documentation Centre. International fiscal guide to tobacco. World  
19  
20  
21  
22  
23 23. World Bank. Country and Lending Groups., 2016.  
24  
25 24. Blecher E, van Walbeek C. An Analysis of Cigarette Affordability. Paris: International  
26  
27  
28  
29 25. Marshall MG, Cole BR. Global Report 2014. Conflict, Governance and State Fragility. :  
30  
31  
32  
33  
34  
35  
36  
37 26. World Health Organization. 2014 global progress report on implementation of the WHO  
38  
39  
40  
41 27. Crosbie E, Sebrie EM, Glantz SA. Tobacco industry success in Costa Rica: the importance of  
42  
43  
44  
45  
46  
47  
48  
49  
50  
51  
52  
53  
54  
55  
56  
57  
58  
59  
60
- Center for Systemic Peace 2014 [Available from:  
<http://www.systemicpeace.org/SFI/matrix2010c.pdf> accessed 31 Jan 2014.
- Framework Convention on Tobacco Control, 2014.
- FCTC article 5.3. *Salud Publica Mex* 2012;54(1):28-38. doi: S0036-36342012000100005  
[pii] [published Online First: 2012/01/31]
- Tobacco Control: Overcoming decades of industry dominance. *Salud Publica Mex*  
2016;58(1):62-70.

- 1  
2  
3 29. Crosbie E, Sosa P, Glantz SA. Defending strong tobacco packaging and labelling regulations  
4  
5 in Uruguay: transnational tobacco control network versus Philip Morris International.  
6  
7 *Tob Control* 2017 doi: 10.1136/tobaccocontrol-2017-053690  
8  
9
- 10 30. Crosbie E, Sosa P, Glantz SA. The importance of continued engagement during the  
11  
12 implementation phase of tobacco control policies in a middle-income country: the case of  
13  
14 Costa Rica. *Tob Control* 2017;26(1):60-68. doi: 10.1136/tobaccocontrol-2015-052701  
15  
16
- 17 31. Bump JB, Reich MR. Political economy analysis for tobacco control in low- and middle-  
18  
19 income countries. *Health Policy Plan* 2013;28(2):123-33. doi: czs049 [pii]  
20  
21  
22 10.1093/heapol/czs049 [published Online First: 2012/05/16]  
23  
24
- 25 32. Leischow SJ, Ayo-Yusuf O, Backinger CL. Converging research needs across framework  
26  
27 convention on tobacco control articles: making research relevant to global tobacco  
28  
29 control practice and policy. *Nicotine Tob Res* 2012;15(4):761-6. doi: nts199 [pii]  
30  
31  
32 10.1093/ntr/nts199 [published Online First: 2012/09/20]  
33  
34
- 35 33. Sanders-Jackson AN, Song AV, Hiilamo H, et al. Effect of the Framework Convention on  
36  
37 Tobacco Control and voluntary industry health warning labels on passage of mandated  
38  
39 cigarette warning labels from 1965 to 2012: transition probability and event history  
40  
41 analyses. *Am J Public Health* 2013;103(11):2041-7. doi: 10.2105/AJPH.2013.301324  
42  
43 [published Online First: 2013/09/14]  
44  
45
- 46 34. Uang R, Hiilamo H, Glantz SA. Accelerated Adoption of Smoke-Free Laws After  
47  
48 Ratification of the World Health Organization Framework Convention on Tobacco  
49  
50 Control. *Am J Public Health* 2016;106(1):166-71. doi: 10.2105/AJPH.2015.302872  
51  
52
- 53 35. Hiilamo H, Glantz S. FCTC followed by accelerated implementation of tobacco advertising  
54  
55 bans. *Tob Control* 2016 doi: 10.1136/tobaccocontrol-2016-053007  
56  
57

- 1  
2  
3 36. Mahoney J. Path Dependence in Historical Sociology. *Theory and Society* 2000;29:507–48.  
4  
5  
6 37. Blecher E. Targeting the affordability of cigarettes: a new benchmark for taxation policy in  
7  
8 low-income and-middle-income countries. *Tob Control* 2010;19(4):325-30. doi:  
9  
10 10.1136/tc.2009.030155  
11  
12 38. Blecher E, Ross H, Leon ME. Cigarette affordability in Europe. *Tob Control* 2013;22(4):e6.  
13  
14 doi: 10.1136/tobaccocontrol-2012-050575  
15  
16 39. Gilmore AB, Fooks G, Drope J, et al. Exposing and addressing tobacco industry conduct in  
17  
18 low-income and middle-income countries. *Lancet* 2015;385(9972):1029-43. doi:  
19  
20 10.1016/S0140-6736(15)60312-9  
21  
22  
23 40. Wipfli H. The Global War on Tobacco. Mapping the World's First Public Health Treaty.  
24  
25 Baltimore: Johns Hopkins University Press 2016.  
26  
27  
28 41. Blecher E, Ross H, Stoklosa M. Lessons learned from cigarette tax harmonisation in the  
29  
30 European Union. *Tob Control* 2014;23(e1):e12-4. doi: 10.1136/tobaccocontrol-2012-  
31  
32 050728  
33  
34  
35 42. Campaign for Tobacco-Free Kids. Tobacco tax success story: United Kingdom. Washington,  
36  
37 2012.  
38  
39  
40 43. Sinha DN, Gupta PC, Kumar A, et al. The poorest of poor suffer the greatest burden from  
41  
42 smokeless tobacco use: A study from 140 countries. *Nicotine Tob Res* 2017 doi:  
43  
44 10.1093/ntr/ntx276  
45  
46  
47  
48  
49  
50  
51  
52  
53  
54  
55  
56  
57  
58  
59  
60

**FIGURE CAPTIONS**

Figure 1. Tobacco tax rates in 1998/1999 and 2014 as percent of retail price.

Figure 2. Shares of price of 100 cigarette packs of Gross Domestic Product per Capita in 1999 and 2014 as percent of retail price.

For peer review only

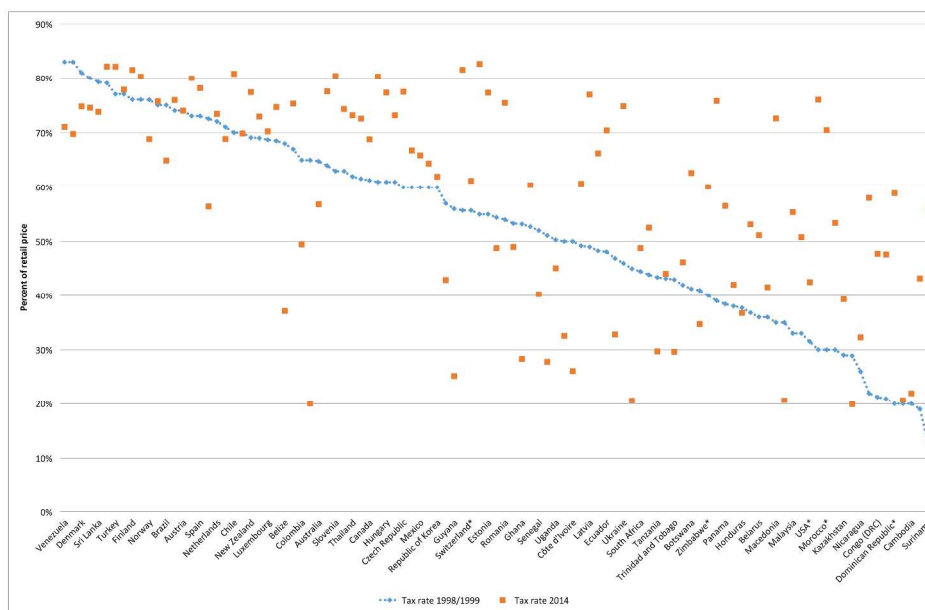

\* Country has not ratified FCTC.

Figure 1. Tobacco tax rates in 1998/1999 and 2014 as percent of retail price.

Caption : Figure 1. Tobacco tax rates in 1998/1999 and 2014 as percent of retail price.

504x377mm (300 x 300 DPI)

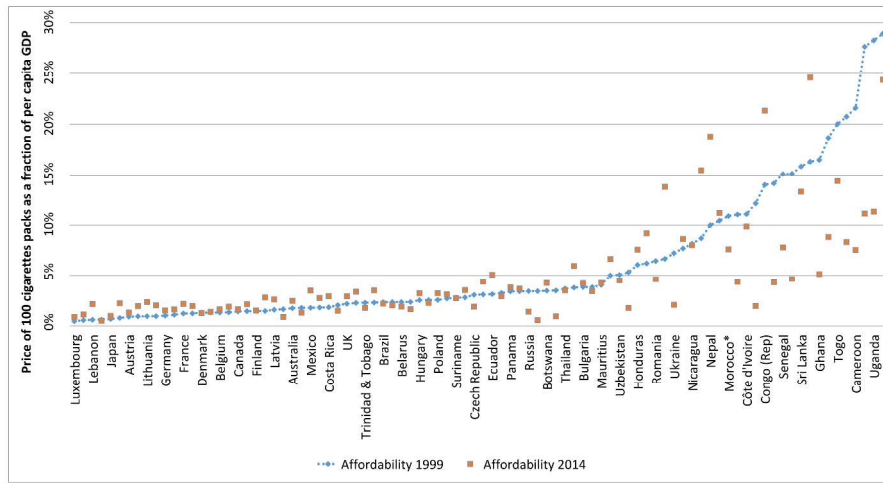

\* Country has not ratified FCTC.

Figure 2. Shares of price of 100 cigarette packs of Gross Domestic Product per Capita in 1999 and 2014 as percent of retail price.

Caption : Figure 2. Shares of price of 100 cigarette packs of Gross Domestic Product per Capita in 1999 and 2014 as percent of retail price.

504x313mm (300 x 300 DPI)

view only

# BMJ Open

## LIMITED IMPLEMENTATION OF THE FRAMEWORK CONVENTION ON TOBACCO CONTROL'S TOBACCO TAX PROVISION: GLOBAL COMPARISON

|                                 |                                                                                                                                                                                                                                                                                                                                                                                                                                         |
|---------------------------------|-----------------------------------------------------------------------------------------------------------------------------------------------------------------------------------------------------------------------------------------------------------------------------------------------------------------------------------------------------------------------------------------------------------------------------------------|
| Journal:                        | <i>BMJ Open</i>                                                                                                                                                                                                                                                                                                                                                                                                                         |
| Manuscript ID                   | bmjopen-2017-021340.R2                                                                                                                                                                                                                                                                                                                                                                                                                  |
| Article Type:                   | Research                                                                                                                                                                                                                                                                                                                                                                                                                                |
| Date Submitted by the Author:   | 13-Jun-2018                                                                                                                                                                                                                                                                                                                                                                                                                             |
| Complete List of Authors:       | Hiilamo, Heikki; University of Helsinki, Department of Social Research, social and public policy; VID Specialized University, Oslo, Norway , •Faculty of Theology, Diaconia and Leadership Studies<br>Glantz, S; University of California, San Francisco, Center for Tobacco Control Research and Education, Philip R. Lee Institute for Health Policy Studies, Helen Diller Family Comprehensive Cancer Center, Department of Medicine |
| <b>Primary Subject Heading</b>: | Smoking and tobacco                                                                                                                                                                                                                                                                                                                                                                                                                     |
| Secondary Subject Heading:      | Global health                                                                                                                                                                                                                                                                                                                                                                                                                           |
| Keywords:                       | tobacco industry, tobacco taxation, FCTC                                                                                                                                                                                                                                                                                                                                                                                                |
|                                 |                                                                                                                                                                                                                                                                                                                                                                                                                                         |

SCHOLARONE™  
Manuscripts

only

1  
2  
3 **LIMITED IMPLEMENTATION OF THE FRAMEWORK CONVENTION ON**  
4  
5 **TOBACCO CONTROL'S TOBACCO TAX PROVISION: GLOBAL COMPARISON**  
6  
7  
8  
9  
10

11  
12 Heikki Hiilamo<sup>ab</sup>, PhD  
13

14 Stanton Glantz<sup>c</sup>, PhD  
15

16  
17 <sup>a</sup> VID Specialized University, Oslo, Norway

18 <sup>b</sup> Social and public policy, Department of Social Research, 00014 University of Helsinki,  
19 Finland, heikki.hiilamo@helsinki.fi

20 <sup>c</sup>Center for Tobacco Control Research and Education, Philip R. Lee Institute for Health Policy  
21 Studies, Helen Diller Family Comprehensive Cancer Center, Department of Medicine  
22 University of California San Francisco, San Francisco, CA 94143-1390, stanton.glantz@ucsf.edu  
23  
24  
25  
26

27 Corresponding Author:  
28 Heikki Hiilamo, Professor  
29 University of Helsinki  
30 Department of Social Research  
31 Snellmaninkatu 10  
32 00014 Helsingin yliopisto  
33 Finland  
34 Tel. +358403587203  
35 Fax. +358294124835  
36 [heikki.hiilamo@helsinki.fi](mailto:heikki.hiilamo@helsinki.fi)  
37  
38  
39

40 Word count 3425  
41  
42  
43  
44  
45  
46  
47  
48  
49  
50  
51  
52  
53  
54  
55  
56  
57  
58  
59  
60



## ABSTRACT

**OBJECTIVE:** To quantify changes in tobacco tax rates and cigarette affordability after countries ratified the WHO Framework Convention on Tobacco Control (FCTC) using with the World Health Organization MPOWER standards.

**METHODS:** We used logistic regression to assess the association of FCTC ratification with adoption of at least 50% and 75% (high) of retail price tobacco tax rates for the most sold brands in countries, accounting for years since ratification and other covariates. We also compared cigarette affordability in 2014 to 1999.

**RESULTS:** By 2014, 44% of high-income countries had taxes above 75% of retail value compared to 18% in 1998/1999. In fifteen years 69 countries increased the tobacco tax rate, 33 decreased it, and one had the same tax rate. FCTC ratification was not associated with implementing high tobacco taxes. More fragile countries in terms of security, political, economic, and social development were less likely to have at least 50% and 75% tobacco tax rates in 2014 compared with 1999. The higher the cigarette prices in 1999 the less likely the countries were to have at least 75% tobacco tax rates in 2014. However, cigarettes were less affordable in 2014 than in 1999 in countries that had ratified FCTC earlier.

**CONCLUSIONS:** Despite widespread FCTC ratification, implementing higher tobacco taxes remains incomplete. Guidelines for FCTC Article 6 implementation should assign definite targets for tobacco taxes and for implementation of a tax escalator that gradually increases taxes to match rising income levels. Fragile countries are less likely to have high tobacco taxes and less affordable cigarettes. The tobacco control community should intensify efforts to help fragile countries improve performance in FCTC implementation both through strengthening their administrative and technical capacity and through supporting basic functions of government.

## STRENGTHS AND LIMITATIONS OF THIS STUDY

- We were able to assess changes in tobacco taxes and prices over 15 years in 103 countries.
- We used WHO's own standards for effective tax rates.
- The willingness and ability of states to implement effective tobacco taxes was measured through state fragility index.
- The limitation of the study is that we could not analyze how the tobacco companies respond to the tax increase.
- The baseline data came from two different data sources.

## WHAT THIS PAPER ADDS

- Tobacco taxes can effectively reduce tobacco use, but FCTC ratification was not associated with implementing high tobacco taxes.
- Compared with 1999 cigarettes were more affordable in 2014. However, in countries that had ratified FCTC earlier cigarettes were less affordable.
- Guidelines for FCTC Article 6 implementation should assign specific minimum targets for tobacco taxes and for implementation of a tax escalator that gradually increased taxes to match raising income levels.

## INTRODUCTION

Raising tobacco taxes is an effective strategy to reduce tobacco use<sup>1-3</sup>. On average a 10% price increase will reduce tobacco use by 4% in high income countries and by 5% among low- and middle-income countries.<sup>4</sup> Article 6 of the World Health Organization (WHO) Framework Convention on Tobacco Control<sup>5</sup> (FCTC) commits parties to implement “tax policies and, where appropriate, price policies, on tobacco products so as to contribute to the health objectives aimed at reducing tobacco consumption.”<sup>5</sup> Article 6 implementation guidelines<sup>6</sup> recommend tax policies which take into account tobacco products’ price elasticity (the rate by which tobacco consumption decreases as result of price increases) and income elasticity (the sensitivity of tobacco consumption to income changes) to make tobacco products less affordable over time, but does not set specific targets for taxes or prices.

Tobacco industry tactics to block tax increases have a major influence on tax rates and industry responses to tax increases have a major effect on cigarette prices. Tobacco taxes are politically difficult to raise because tobacco companies fight tax increases<sup>2</sup> by commissioning research claiming economic benefits of tobacco, creating alliances,<sup>7</sup> including with progressive organizations,<sup>8</sup> lobbying ministries of finance with poor knowledge of public health and FCTC requirements,<sup>9</sup> and arguing tax increases drive illicit trade<sup>2</sup> and hurt disadvantaged groups.<sup>8 10 11</sup> They also learned how to cope with tax increases and sometimes actually benefit from them by overshifting taxes on premium brands to increase profits while downshifting taxes on ultra-low-price brands to cushion the effects of tax increases on total consumption.<sup>12-15</sup> Even a series of substantial tax increases, such as in Australia<sup>16</sup>, may not increase the tax rate if the industry keeps overshifting tax increases to prices. In this sense, tax rates can be a relatively poor indicator of cigarette prices.

1  
2  
3 WHO established the MPOWER measures in 2008 to scale up key FCTC demand  
4  
5 reduction measures including tobacco taxes. MPOWER emphasizes that “increasing the price of  
6  
7 tobacco through higher taxes is the single most effective way to encourage tobacco users to quit  
8  
9 and prevent children from starting to smoke.”<sup>2</sup> A key finding of the 2015 MPOWER report was  
10  
11 that taxes were the least implemented MPOWER measure with only 10% of the world’s  
12  
13 population (living in 33 countries) covered by taxes of at least 75% of retail price<sup>2</sup>. This paper  
14  
15 assesses the association of FCTC ratification with implementing tobacco taxes by analyzing  
16  
17 changes in tax rate using the MPOWER standard and cigarette affordability. In addition, we  
18  
19 assess the role of state capacity and previous tax and price levels<sup>17 18</sup> on taxes in 2014.  
20  
21  
22  
23

## 24 **METHODS**

### 25 **Data**

26  
27 Data on the tobacco tax rate, including specific excise, ad valorem excise, import duties,  
28  
29 value added tax, and other taxes were obtained from the World Health Organization Report on  
30  
31 the Global Tobacco Epidemic 2015 public dataset for 2014.<sup>19</sup> This dataset includes information  
32  
33 collected by WHO in-country experts as of 31 December 2014 on the prices of the most-sold  
34  
35 brand of cigarettes (both in local currency and in US dollars) and cigarette taxes. Information on  
36  
37 the taxation of cigarettes (and when possible, most commonly used tobacco products) was  
38  
39 collected from ministries of finance. (Because WHO did not report tax data for Syria in 2014 we  
40  
41 used the data from 2012 for 2014.) In countries where different taxes applied to cigarettes based  
42  
43 on length, quantity produced, or type (e.g., filter vs. non-filter), the rate that applied to the most  
44  
45 popular brand was used to calculate the tax rate.  
46  
47  
48  
49  
50

51 We obtained baseline pre-FCTC taxes using the 1999 World Bank (WB) survey of 64  
52  
53 countries that reported the share of cigarette taxes (including value added tax, VAT) as a  
54  
55  
56  
57  
58  
59  
60

1  
2  
3 percentage of the retail price of a pack of cigarettes<sup>20</sup> supplemented by the tobacco industry's  
4  
5 International Tobacco Documentation Centre's<sup>21</sup> 1998 *International Fiscal Guide to Tobacco*  
6  
7 that mapped international taxation, price and tariff policies.<sup>22</sup>  
8  
9

10 Tobacco tax rate is the portion of the price represented by all taxes (including VAT for  
11  
12 the most-sold brand of cigarettes, is our outcome variable. We studied two outcome variables  
13  
14 derived from MPOWER standards in the *WHO Report on the Global Tobacco Epidemic 2015:*  
15  
16 *Raising Taxes on Tobacco:* (1) taxes that totaled at least 75% of retail price, the highest  
17  
18 MPOWER standard<sup>2</sup>, and (2) taxes that totaled at least 50% of retail price, the second highest  
19  
20 standard.<sup>2</sup> FCTC Article 6 does not set targets on tobacco prices. The expectation in FCTC and  
21  
22 MPOWER is that if the manufacturers increase wholesale prices so that the overall tax rate drops  
23  
24 below 75% or 50%, the government would increase taxes so that the tax share would go above  
25  
26 75% or 50%.  
27  
28  
29

30  
31 To analyze the income level of the countries we used World Bank (WB) 2016 gross  
32  
33 national income (GNI) categories:<sup>23</sup> low-income countries were defined as those with a GNI per  
34  
35 capita of \$1,045 or less in 2014; middle-income economies, \$1,046 to \$12,735; high income,  
36  
37 \$12,736 or more. Lower-middle-income and upper-middle-income economies were separated at  
38  
39 a GNI per capita of \$4,125. Since our sample included only eight low-income countries, after  
40  
41 cross tabulation analysis we combined low income and lower middle-income categories in the  
42  
43 regression analysis. We used information on cigarette prices expressed in nominal US dollars in  
44  
45 1998/1999.  
46  
47  
48

49 We analyzed the association of FCTC with affordability of cigarettes by using the  
50  
51 fraction of per capita gross domestic product (GDP) that would be needed to buy 100 packs of  
52  
53 the most sold cigarette brand. This method is a more comprehensive and representative measure  
54  
55  
56  
57

1  
2  
3 of income across countries in different income levels than, for example surveys of wages.<sup>24</sup>We  
4 used price data described above and World Bank data for GDP per capita for 1999 and 2014.<sup>23</sup> In  
5  
6 addition, we used the growth of GDP per capita from 1999 to 2014<sup>23</sup> ( $[(2014 \text{ GDP} - 1999$   
7  
8 GDP]/1999 GDP, GDP expressed in 2014 US dollars) as an independent variable on the  
9  
10 assumption that cigarettes would be more affordable in 2014 among those countries where the  
11  
12 rise in income level was the fastest. We assume that changes in GDP over the 16-year period  
13  
14 reflect changes in disposable income.  
15  
16  
17

### 18 19 **Other Variables**

20  
21 To study the willingness and ability of states to implement public policies we used  
22  
23 Marshall and Cole's<sup>25</sup> state fragility index. This index scores all countries with population above  
24  
25 500,000 in four performance dimensions: security, political, economic, and social. Previous  
26  
27 literature has shown that state fragility matters for implementing effective cigarette health  
28  
29 warnings.<sup>17 18</sup> The index gives higher scores for more fragile countries (Sudan scored 23 while  
30  
31 the 15 most stable countries scored 0) but does not place countries into different categories. We  
32  
33 averaged scores for 2007, 2010 and in 2013 to test whether more fragile countries were less  
34  
35 likely to have high tobacco taxes in 2014. By more fragile countries we refer to those countries  
36  
37 which score higher on Marshall and Cole's state fragility index.  
38  
39  
40  
41

42 We studied the role of previous tax and price levels on tax rate in 2014 with two  
43  
44 variables, tobacco tax rates in 1998/1999 and price of most sold cigarette packs in US dollars in  
45  
46 1998/1999. We tested whether countries with higher cigarette taxes and higher price cigarettes in  
47  
48 1998/1999 were more likely to have high tax rates in 2014.  
49  
50

### 51 **Statistical Analysis**

1  
2  
3 Logistic regression was used in separate analyses with 75% and 50% tax rates in 2014 as  
4 the outcome variable. We studied the effect of FCTC by calculating the number of years since  
5 FCTC ratification as of 2014. We set years since ratification to 0 for countries that ratified the  
6 FCTC in 2014 (El Salvador, Ethiopia and Zimbabwe), had signed but not ratified the FCTC as of  
7 the end of 2014 (Argentina, Cuba, Haiti, Morocco, Mozambique, Switzerland and the United  
8 States), or had not signed or become parties to the FCTC by January 2016 (Andorra, Dominican  
9 Republic, Eritrea, Indonesia, Liechtenstein, Malawi, Monaco, Somalia). Countries that already  
10 had a tax rate of 50% (final sample used N=44) or 75% (N=88) in 1998/1999 were excluded  
11 from the analysis.  
12  
13  
14  
15  
16  
17  
18  
19  
20  
21  
22  
23

24 Our analysis has 80% statistical power (with  $\alpha=.05$ ) to detect an OR by a factor of 1.25  
25 (or 0.80) associated with FCTC ratification.  
26  
27

28 We also used logistic regression to analyze the effect of the FCTC on cigarette  
29 affordability by assigning a value of 1 for those countries where cigarettes were less affordable  
30 in 2014 than in 1999 and 0 where cigarettes were more affordable. We tested interaction between  
31 state capacity and FCTC ratification to see if more fragile countries were slower in ratifying  
32 FCTC. We also ran a sensitivity analysis to test if cigarettes are less affordable in countries with  
33 extensive tobacco control measures.  
34  
35  
36  
37  
38  
39  
40  
41

42 We used R functions `glm` and `minEffect.VSMc.logistic` from `powerMediation` for the  
43 analysis.  
44  
45

#### 46 **Patient and Public Involvement**

47 Patients or public were not involved in the study.  
48  
49

#### 50 **RESULTS**

Tobacco tax rates have not uniformly increased from 1998/1999 to 2014 as shown in Figure 1 where the countries are ranked by their tax rate in 1998/1999. The average tax rate increased from 53% of the price of the most sold cigarette brands in 1998/1999 to 58% in 2014. In those fifteen years 69 countries increased the tobacco tax rate, 33 decreased it (30 FCTC ratifying countries), and one country (Austria) had the same tax rate.

In 1998/1999 only 8 (18%) of high-income, 2 (8%; Brazil and Costa Rica) upper-middle-income, one lower-middle-income country (4%, Sri Lanka), and none of the low-income countries had a tax above 75% of the retail price (Table 1). By 2014, 44% of high-income countries had taxes above 75% of retail value. The progress was slow among higher- and lower-middle-income countries with just one additional country complying in each income category and no low-income country.

In 1998/1999 37 (82%) of high-income countries had taxes that comprised above 50% of retail price, while only 11 (46%) of higher-middle-income countries, 9 (35%) of lower-middle-income countries, and two (23%) low-income country had that tax rate. By 2014 39 (87%) of high-income countries had taxes above 50% of retail price, as did 16 (67%) of upper-middle - income countries, 13 (50%) of lower-middle-income countries, and 1 (13%) low-income country (Zimbabwe).

| <b>Table 1. Countries with 75% and 50% tobacco tax rates in 1998/1999 and 2014 by income group</b> |     |    |                       |                   |    |                       |
|----------------------------------------------------------------------------------------------------|-----|----|-----------------------|-------------------|----|-----------------------|
| Tobacco tax > 75% (high)                                                                           |     |    |                       | Tobacco tax > 50% |    |                       |
|                                                                                                    | Yes | No | Fraction of countries | Yes               | No | Fraction of countries |
| High-income                                                                                        |     |    |                       |                   |    |                       |
| 1998/1999                                                                                          | 8   | 37 | 18%                   | 37                | 8  | 82%                   |
| 2014                                                                                               | 20  | 25 | 44%                   | 39                | 7  | 87%                   |
| Upper-middle-income                                                                                |     |    |                       |                   |    |                       |



|                                                                                                                                                                                                                                                                                                                                                                                                                                                                                                                                                                                                                                                                                                                                                                                                                                                                                                                                                                  |   |    |     |    |    |     |
|------------------------------------------------------------------------------------------------------------------------------------------------------------------------------------------------------------------------------------------------------------------------------------------------------------------------------------------------------------------------------------------------------------------------------------------------------------------------------------------------------------------------------------------------------------------------------------------------------------------------------------------------------------------------------------------------------------------------------------------------------------------------------------------------------------------------------------------------------------------------------------------------------------------------------------------------------------------|---|----|-----|----|----|-----|
| 1998/1999                                                                                                                                                                                                                                                                                                                                                                                                                                                                                                                                                                                                                                                                                                                                                                                                                                                                                                                                                        | 2 | 22 | 8%  | 11 | 13 | 46% |
| 2014                                                                                                                                                                                                                                                                                                                                                                                                                                                                                                                                                                                                                                                                                                                                                                                                                                                                                                                                                             | 3 | 21 | 13% | 16 | 8  | 67% |
| Lower-middle-income                                                                                                                                                                                                                                                                                                                                                                                                                                                                                                                                                                                                                                                                                                                                                                                                                                                                                                                                              |   |    |     |    |    |     |
| 1998/1999                                                                                                                                                                                                                                                                                                                                                                                                                                                                                                                                                                                                                                                                                                                                                                                                                                                                                                                                                        | 1 | 25 | 4%  | 9  | 17 | 35% |
| 2014                                                                                                                                                                                                                                                                                                                                                                                                                                                                                                                                                                                                                                                                                                                                                                                                                                                                                                                                                             | 1 | 25 | 4%  | 13 | 13 | 50% |
| Low-income                                                                                                                                                                                                                                                                                                                                                                                                                                                                                                                                                                                                                                                                                                                                                                                                                                                                                                                                                       |   |    |     |    |    |     |
| 1998/1999                                                                                                                                                                                                                                                                                                                                                                                                                                                                                                                                                                                                                                                                                                                                                                                                                                                                                                                                                        | 0 | 8  | 0%  | 2  | 6  | 23% |
| 2014                                                                                                                                                                                                                                                                                                                                                                                                                                                                                                                                                                                                                                                                                                                                                                                                                                                                                                                                                             | 0 | 8  | 0%  | 1  | 7  | 13% |
| <p>45 countries changed WB status during the observation period. The following countries changed from low-income countries to lower-middle income countries: Bangladesh, Cambodia, Cameroon, Côte d'Ivoire, Ghana, Honduras, India, Kenya, Lesotho, Nicaragua, Nigeria, Pakistan and Vietnam. The following countries changed from lower-middle income countries to upper-middle income countries: Algeria, Belarus, Belize, Bulgaria, Columbia, Costa Rica, Dominican Republic, Ecuador, Fiji, Guyana, Jamaica, Kazakhstan, Macedonia, Namibia, Panama, Romania, Russia, Suriname and Thailand. The following countries changed from upper-middle-income countries to high income countries: Barbados, Chile, Czech Republic, Estonia, Hungary, Malta, Poland, Republic of Korea, Slovakia, Trinidad and Tobago and Uruguay. Latvia and Lithuania changed from lower-income countries to high-income countries. No country changed to a lower income group.</p> |   |    |     |    |    |     |

The logistic regression showed that time since FCTC ratification was not associated with implementing high tobacco taxes (Table 2). More fragile countries were less likely to have 75% and 50% tobacco tax rates in 2014. Countries with higher cigarette prices in 1998/1999 were more likely to have 75% tax rates in 2014. Countries with higher tax rates in 1998/1999 were more likely than countries with lower tax rates in 1998/1999 to have 75% tobacco tax rates in 2014. To test overall effects we calculated a linear regression model for all countries in our sample with tax rates in 2014 as the dependent variable and FCTC ratification, tax rate in 1999, price in 1999 and state capacity as independent variables ( $R^2 = 0.48$ ). FCTC ratification and price were not statistically significant ( $P > 0.7$  and  $P > 0.3$  respectively). The coefficients for tax rate in 1999 were 0.40 ( $p < 0.001$ ) and for state capacity -1.58 ( $p < 0.001$ ). The variance inflation

factors in the first model ranged from 1.08 to 1.68 and in the second model from 1.04 to 1.12, well below the threshold for multicollinearity concern.

As a sensitivity analysis, we also ran OLS regression with actual tax rate in 2014 as the dependent variable for the whole sample. We used the same independent variables as in logit analysis. Tax rate in 1999 was positively associated with tax rate in 2014 (coeff. 0.41,  $p=0.0003$ ) and lack of state capacity was negatively associated with tax in 2014 (coeff. -1.52,  $p=0.00001$ ). The results were essentially the same as the logistic regression analysis.

**Table 2. Odds of passing high standard tobacco taxes by 2014 (among non-compliant countries in 1998/1999)**

| Variable                           | Tobacco tax $\geq$ 75% of retail price (high) |             | Tobacco tax $\geq$ 50% of retail price |             |
|------------------------------------|-----------------------------------------------|-------------|----------------------------------------|-------------|
|                                    | Odds ratio                                    | 95% CI      | Odds ratio                             | 95% CI      |
| Years since FCTC ratification      | 1.04                                          | (0.81-1.43) | 0.94                                   | (0.76-1.15) |
| Tax rate in 1998/1999              | 1.07*                                         | (1.00-1.14) | 1.01                                   | (0.94-1.08) |
| Price in 1998/1999                 | 0.31*                                         | (0.10-0.73) | 0.78                                   | (0.22-2.78) |
| State capacity                     | 0.67**                                        | (0.49-0.83) | 0.86*                                  | (0.74-0.99) |
| Number of countries (observations) | 88                                            |             | 62                                     |             |

\*  $P \leq 0.05$ , \*\*  $P \leq 0.01$ , Numbers in parentheses are 95% confidence intervals.

There were large differences in affordability of cigarettes across countries in both 1999 and 2014 (Figure 2). At the lower end of the range, in 2014 less than one percent of per capita GDP was required to buy 100 packs of the most sold cigarette brands in Luxembourg, while at the upper end in Tanzania the corresponding figure was 24.6% (28.9% in 1999). Cigarettes become less affordable between 1999 and 2014 in 51 countries and more affordable in 40 countries. Cigarettes had become less affordable in 73% of high-income countries (27/37), 61% of upper-middle-income countries (14/23) and 31% of lower-middle- and low-income countries

(10/32). Ratifying the FCTC earlier was associated with cigarettes becoming less affordable in 2014 implying perhaps that countries with affordable cigarette prices in 1999 were quicker to ratify the FCTC and implement its tax provision (Table 3). Cigarettes became more affordable in countries with high rates of per capita GDP growth between 1999 and 2014. Lack of state capacity was associated with lower odds for having less affordable cigarettes. The variance inflation factors ranged from 1.04 to 1.10, indicating no multicollinearity problems.

As a sensitivity analysis, we also ran OLS regression with cigarette affordability in 2014 as the dependent variable for the whole sample. We used the same independent variables as in logit analysis. The direction of association was again similar as in logit analysis. Ratifying the FCTC earlier was positively associated with cigarettes becoming less affordable in 2014 (coeff.0.04, p=0.03), while GDP growth (coeff.-0.10, p=0.001) and lack of state capacity (coeff.-0.02, p=0.001) were negatively associated with having less affordable cigarettes.

| <b>Table 3. Odds of cigarettes being less affordable by 2014</b>                          |            |             |
|-------------------------------------------------------------------------------------------|------------|-------------|
| Variable                                                                                  | Odds ratio | 95% CI      |
| Years since FCTC ratification                                                             | 1.23*      | (1.02-1.50) |
| GDP per capita growth from 1999 to 2014                                                   | 0.48**     | (0.28-0.75) |
| State capacity                                                                            | 0.90*      | (0.82-0.99) |
| Number of countries (observations)                                                        | 91         |             |
| * $P \leq 0.05$ , ** $P \leq 0.01$ , Numbers in parentheses are 95% confidence intervals. |            |             |

## DISCUSSION

Our results confirm earlier findings showing slow progress in meeting the 75% or 50% tobacco tax rate targets among low- and middle-income countries.<sup>2 26</sup> Likewise, our results support concerns<sup>2</sup> that FCTC Article 6 has not, in general, led countries to implement high tobacco taxes. Lack of success can be partly attributed to state fragility. More fragile countries in

1  
2  
3 terms of security, political, economic, and social development may not have administrative and  
4 technical capacity to implement high tobacco taxes.<sup>27-30</sup> We did not detect an interaction between  
5 state capacity and time since FCTC ratification, which indicates that weak state capacity as such  
6 may not prevent countries from ratifying FCTC. Promoting the FCTC should include  
7 strengthening of the basic functions of government.<sup>31 32</sup>

8  
9  
10  
11  
12  
13  
14  
15 Countries with higher tax rates in 1998/1999 were more likely to have at least a 75% tax  
16 rate in 2014. Increasing tobacco taxes requires determined action from governments. Countries  
17 that had higher tobacco taxes before the FCTC continued to do so also after ratifying it. The  
18 results indicate a path-dependency in tobacco taxation policies.<sup>33-35</sup> The passing of tobacco tax  
19 policies is a contingent event that sets into motion institutional patterns that have deterministic  
20 properties.<sup>36</sup> The result emphasizes the importance of intensifying efforts to implement high  
21 tobacco taxes especially in countries with originally low tax rates.

22  
23  
24  
25  
26  
27  
28  
29  
30  
31 Surprisingly, lower, not higher, cigarette prices in 1998/1999 were associated with 75%  
32 tobacco tax rates in 2014 (Table 2). Countries with low cigarette prices in 1998/1999 may have  
33 reached the target with regular inflationary adjustments. This association may also reflect a  
34 possible ceiling effect where governments are reluctant to increase tobacco taxes if the cigarettes  
35 are already relatively expensive. This could also result from tobacco industry lobbying.<sup>2 7-9</sup>  
36  
37  
38  
39  
40  
41  
42 FCTC Article 6 and its implementation guidelines expressly emphasize health goals in  
43 determining tobacco taxation but governments may try to maintain popular support through  
44 adopting small tobacco tax increases instead of large increases. It is also possible that that it is  
45 easier for a country to reach the 75% tax rate if the price was low before the tax increase.

46  
47  
48  
49  
50  
51 Consistent with earlier studies on cigarette affordability, cigarettes were more affordable  
52 in 2014 than in 1999 despite tax increases.<sup>2 24 37 38</sup> Our paper includes data collected well after  
53  
54  
55  
56  
57

1  
2  
3 2010, so we were able base our analysis on a longer time horizon than earlier analyses and  
4  
5 thereby confirm well-established trend in cigarette affordability. Countries that ratified FCTC  
6  
7 earlier on average had less affordable cigarettes in 2014. The results seem to contradict the  
8  
9 earlier finding of the non-significant association of FCTC ratification with having high cigarette  
10  
11 taxes. It may well be that the FCTC prompted countries to increase tobacco taxes but not enough  
12  
13 to obtain 50% or 75% tax rates. It is also possible that countries with already high tax rates were  
14  
15 more likely to ratify FCTC earlier. If we include 199 tobacco tax rates in the model, FCTC  
16  
17 ratification remains statistically significant.  
18  
19

20  
21 There are many different ways that one could define an “effective” tax rate, including  
22  
23 70% tax rate as specified in the WHO Technical Manual on Tobacco Tax Administration (1).  
24  
25 The MPOWER set a target of 75% of price. Because this is a paper on the effect that the FCTC  
26  
27 had on tax policy, we used the WHO’s own standard of success as defined in MPOWER. The  
28  
29 MPOWER measures for effective tax rates are arbitrary and different measures could be also  
30  
31 used.  
32  
33  
34

35  
36 Our results emphasize the role of economic development in preventing cigarettes from  
37  
38 becoming less affordable. If incomes rise quickly, cigarettes become more affordable even if  
39  
40 taxes are kept constant.<sup>24</sup> This development is reflected in our result where rapid per capita  
41  
42 GDP growth between 1999 and 2014 was associated with more affordable cigarettes in 2014.  
43  
44 Among those 14 countries where the per capita GDP increased more than 300% in 15 years,  
45  
46 cigarettes were less affordable in just three countries. In fact, the weakness of set tobacco tax rate  
47  
48 targets, for example 50% of retail price, is that they do not take into account the effect of rising  
49  
50 incomes or industry pricing behavior. Keeping other factors constant the demand for cigarettes  
51  
52 generally increases with the average level of income, especially in developing countries.<sup>24</sup>  
53  
54  
55  
56  
57

1  
2  
3 Lack of state capacity was associated with both lower odds for having high tobacco taxes  
4 and less affordable cigarettes. Tobacco taxes are low and cigarettes are affordable in more fragile  
5 countries, while taxes are high and cigarettes less affordable in more stable countries. As of  
6  
7  
8  
9  
10  
11  
12  
13  
14  
15  
16  
17  
18  
19  
20  
21  
22  
23  
24  
25  
26  
27  
28  
29  
30  
31  
32  
33  
34  
35  
36  
37  
38  
39  
40  
41  
42  
43  
44  
45  
46  
47  
48  
49  
50  
51  
52  
53  
54  
55  
56  
57  
58  
59  
60

Lack of state capacity was associated with both lower odds for having high tobacco taxes and less affordable cigarettes. Tobacco taxes are low and cigarettes are affordable in more fragile countries, while taxes are high and cigarettes less affordable in more stable countries. As of 2018, the multinational tobacco companies were targeting countries in Asia and Africa with young populations and relatively low smoking prevalence, especially among women.<sup>39</sup>

The tax provisions in the FCTC do not include specific tax targets.<sup>5</sup> The unwillingness of FCTC parties to commit to minimum tax levels during FCTC negotiations is reflected in the lack of subsequent action.<sup>40</sup> FCTC Guidelines for Article 6 implementation recommend that Parties should take into account “both price elasticity and income elasticity of demand, as well as inflation and changes in household income, to make tobacco products less affordable over time in order to reduce consumption and prevalence.”<sup>5</sup> Our results demonstrate that current policies for implementing tobacco taxes fail to meet this recommendation.

In our sample cigarettes became more affordable from 1999 to 2014. Taking the FCTC Guideline recommendation seriously would entail the Conference of the FCTC Parties assigning definite targets not only for tobacco tax rates but also for measures that prevent tobacco products from becoming more affordable.

The effect of cigarettes becoming more affordable with rapid income rises can be prevented by adopting adequate policies.<sup>37 38 41</sup> One example is a tax escalator which is adjusted to income growth or an equivalent variable that accounts for increases in consumer purchasing power.<sup>2</sup> Such a tax escalator is already in place in the UK.<sup>42</sup> With automatically increasing tobacco taxes by the increase in purchasing power the tobacco companies would increase prices, which would prevent tobacco products not becoming more affordable. To allow this process to take place tobacco taxes rates could, at least temporarily, rise even above the 75% standard.

1  
2  
3 Another option is to set a tax for each brand guaranteeing a 75% tax for every product. Doing so  
4  
5 would make it more difficult for tobacco companies to downshift tax increases.  
6  
7

## 8 **Limitations**

9  
10 Assessing the change in tax as a share of price over time can be complicated.<sup>19</sup>  
11  
12 Determination of tax rates as a proportion of total cigarette retail price is dependent on changes  
13  
14 in tax rates but also on changes in wholesale prices. Consequently, despite an increase in the tax  
15  
16 on cigarettes, the share of excise and total taxes in the retail price could remain the same or  
17  
18 shrink depending on how the tobacco companies respond to the tax increase. Similarly, the share  
19  
20 of taxes in the final retail price might increase, even if there is no change in the tax levied on a  
21  
22 pack of cigarettes. The FCTC might have prompted countries to increase tobacco taxes but not  
23  
24 enough, given that the FCTC did not specify 50/75% tax rates as a requirement.  
25  
26  
27

28  
29 To establish a baseline before FCTC we used tobacco tax and price data from two  
30  
31 different sources, World Bank survey from 1999<sup>20</sup> and the International Tobacco Documentation  
32  
33 Centre's<sup>21</sup> 1998 *International Fiscal Guide to Tobacco*. Both data sources include information  
34  
35 on retail price of the most-sold cigarette brand. The high correlation (0.947) for overlapping  
36  
37 price information indicates the data was collected in a substantially uniform manner. The  
38  
39 correlation for tax data was lower, 0.676). This lower correlation could indicate a measurement  
40  
41 error in the datasets or it could indicate that tobacco taxes increased from 1998 to 1999 more  
42  
43 dramatically than cigarette prices. Given the more reliable international standing we deemed the  
44  
45 World Bank survey more reliable than the *International Fiscal Guide to Tobacco* produced by  
46  
47 the tobacco industry. We focused on the price and tax for the most-sold cigarette brand on all  
48  
49 data sources including WHO data for 2014,<sup>19</sup> but were unable to confirm that definitions  
50  
51 remained stable over time. The most-sold cigarette may not fully describe the effect of tobacco  
52  
53  
54  
55  
56  
57  
58  
59  
60

1  
2  
3 taxation to tobacco consumption. We did not analyze the tax structure. Our outcome variable, the  
4 share of all tobacco taxes of the most sold brand, does not fully capture the role of taxes in  
5 reducing demand for tobacco. Earlier research has shown the tobacco industry may  
6 simultaneously absorb the tax increases on its cheapest brands while over-shifting taxes on  
7 premium brands.<sup>12</sup> The higher the level of the excise and other taxes the less room for tobacco  
8 industry price differentiation strategies. We were not able to analyze how countries' tax policies  
9 have accounted for country-specific price and income elasticities.

10  
11  
12 In this study we were not able to assess the causal effects. Besides the variables used in  
13 this study other factors such as economic cycles, political leadership and tobacco control activity  
14 outside of FCTC may have affected the outcome variables.

15  
16  
17 Our analysis focused only on cigarettes ignoring other categories of tobacco products,  
18 some of which (for example bidi) are more prevalent in more fragile countries such as  
19 Bangladesh and India<sup>43</sup>. Since we had data only from two time points we were not able to assess  
20 trends in tax, price and affordability in prior periods.

## 21 22 23 24 25 26 27 28 29 30 31 32 33 34 35 **Conclusions**

36  
37 In contrast to advertising restrictions,<sup>33 35</sup> health warning labels,<sup>33</sup> and smokefree  
38 environments,<sup>34</sup> FCTC ratification has not been systematically followed regarding higher  
39 tobacco taxation. FCTC Article 6 does not stipulate specific tax rates. MPOWER tax rate targets  
40 were not introduced before 2008. The more specific FCTC Articles 8, 11 and 13 discuss smoke  
41 free environments, health warnings and advertising bans that fall into domain of health  
42 government, while Article 6 concerns financial policy, which falls under finance ministries.  
43 There need to be further efforts to increase financial ministries' knowledge of and responsibility  
44 to implement Article 6. Fragile countries are less likely to have high tobacco taxes. Rapid rise in  
45  
46  
47  
48  
49  
50  
51  
52  
53  
54  
55  
56  
57  
58  
59  
60



1  
2  
3 incomes undermines the effectiveness of tobacco taxes. Guidelines for FCTC Article 6  
4  
5 implementation should assign definite targets for tobacco taxes and for the implementation of a  
6  
7 tax escalator that gradually increases taxes to match the rising income levels. The tobacco  
8  
9 control community should collaborate with other parts of civil society to intensify efforts to help  
10  
11 more fragile countries to improve performance in FCTC implementation both through  
12  
13 strengthening their administrative and technical capacity and through supporting the basic  
14  
15 functions of government. The FCTC Conference of the Parties should assign definite targets not  
16  
17 only for tobacco tax rates but also for measures to prevent tobacco products from becoming more  
18  
19 affordable.  
20  
21  
22

## 23 **FUNDING**

24  
25  
26 This work was supported by National Cancer Institute grant CA-087472. The funding  
27  
28 agency played no role in the conduct of the research or preparation of the manuscript.  
29

## 30 **COMPETING INTERESTS**

31  
32  
33 There are no competing interests.  
34

## 35 **CONTRIBUTORSHIP**

36  
37  
38 HH developed the idea for this study and carried out the data collection. HH and SG  
39  
40 carried out the data analysis and wrote and revised the manuscript.  
41

## 42 **DATA SHARING STATEMENT**

43  
44  
45 No data is shared since we are using data which is already made public.  
46  
47  
48  
49  
50  
51  
52  
53  
54  
55  
56  
57

## REFERENCES

1. World Health Organization. WHO technical manual on tobacco tax administration. Geneva, 2010.
  2. World Health Organization. WHO Report on the Global Tobacco Epidemic 2015: Raising taxes on tobacco. Geneva: World Health Organization, 2015.
  3. Jha P, Chaloupka FJ. The economics of global tobacco control. *BMJ* 2000;321(7257):358-61.
  4. International Agency for Research on Cancer. IARC handbooks of cancer prevention: tobacco control. Volume 14: effectiveness of tax and price policies for tobacco control Lyon, France: IARC; 2011 [
  5. World Health Organization. Framework Convention on Tobacco Control. Geneva2003.
  6. FCTC/COP/6/7. Guidelines for implementation of Article 6 of the WHO FCTC2014.
  7. Campbell RB, Balbach ED. Cigarette Excise Taxes in Context: Cautionary Lessons from the U.S. Experience. *Int J Health Serv* 2015;45(3):564-77. doi: 10.1177/0020731415584553
  8. Campbell RB, Balbach ED. Building alliances in unlikely places: progressive allies and the Tobacco Institute's coalition strategy on cigarette excise taxes. *Am J Public Health* 2009;99(7):1188-96. doi: 10.2105/AJPH.2008.143131
  9. Smith KE, Savell E, Gilmore AB. What is known about tobacco industry efforts to influence tobacco tax? A systematic review of empirical studies. *Tob Control* 2013;22(2):144-53. doi: 10.1136/tobaccocontrol-2011-050098
  10. Campbell R, Balbach ED. Mobilising public opinion for the tobacco industry: the Consumer Tax Alliance and excise taxes. *Tob Control* 2008;17(5):351-6. doi: 10.1136/tc.2008.025338
  11. Koch SF. Quasi-experimental evidence on tobacco tax regressivity. *Soc Sci Med* 2018;196:19-28. doi: 10.1016/j.socscimed.2017.11.004
  12. Gilmore AB, Tavakoly B, Taylor G, et al. Understanding tobacco industry pricing strategy and whether it undermines tobacco tax policy: the example of the UK cigarette market. *Addiction* 2013;108(7):1317-26. doi: 10.1111/add.12159
  13. Chaloupka FJ, Cummings KM, Morley CP, et al. Tax, price and cigarette smoking: evidence from the tobacco documents and implications for tobacco company marketing strategies. *Tob Control* 2002;11 Suppl 1:162-72.
  14. Brock B, Choi K, Boyle RG, et al. Tobacco product prices before and after a statewide tobacco tax increase. *Tob Control* 2016;25(2):166-73. doi: 10.1136/tobaccocontrol-2014-052018
  15. Alamar B, Mahmoud L, Glantz SA. Cigarette Smuggling in California: Fact and Fiction. Tobacco Control Policy Making: United States. San Francisco: Center for Tobacco Control Research and Education, UC San Francisco, 2003.
  16. Hirono KT, Smith KE. Australia's \$40 per pack cigarette tax plans: the need to consider equity. *Tob Control* 2017 doi: 10.1136/tobaccocontrol-2016-053608
  17. David PA. Clio and the Economics of QWERTY. *The American Economic Review* 1985;75(2):332-37.
  18. Hiilamo H, Glantz SA. Implementation of effective cigarette health warning labels among low and middle income countries: state capacity, path-dependency and tobacco industry activity. *Soc Sci Med* 2015;124:241-5. doi: 10.1016/j.socscimed.2014.11.054
  19. World Health Organization. WHO report on the global tobacco epidemic 2015, dataset. Geneva, 2015.
  20. Yurekli A, de Beye J. Design and administer tobacco taxes. World Bank economics of tobacco toolkit ; no. 4. design and administration. Washington D.C.: World Bank, 1999.
  21. McDaniel PA, Intinarelli G, Malone RE. Tobacco industry issues management organizations: creating a global corporate network to undermine public health. *Global Health* 2008;4:2. doi: 1744-8603-4-2 [pii]
- 10.1186/1744-8603-4-2 [published Online First: 2008/01/19]

- 1  
2  
3 22. International Tobacco Documentation Centre. International fiscal guide to tobacco. World taxation,  
4 price, tariff and regulatory information. Philip Morris, 1998:2074330579-1410.  
5  
6 23. World Bank. Country and Lending Groups., 2016.  
7  
8 24. Blecher E, van Walbeek C. An Analysis of Cigarette Affordability. Paris: International Union Against  
9 Tuberculosis and Lung Disease, 2008.  
10  
11 25. Marshall MG, Cole BR. Global Report 2014. Conflict, Governance and State Fragility. : Center for  
12 Systemic Peace 2014 [Available from: <http://www.systemicpeace.org/SFI/matrix2010c.pdf>  
13 accessed 31 Jan 2014].  
14  
15 26. World Health Organization. 2014 global progress report on implementation of the WHO Framework  
16 Convention on Tobacco Control, 2014.  
17  
18 27. Crosbie E, Sebrie EM, Glantz SA. Tobacco industry success in Costa Rica: the importance of FCTC  
19 article 5.3. *Salud Publica Mex* 2012;54(1):28-38. doi: S0036-36342012000100005 [pii] [published  
20 Online First: 2012/01/31]  
21  
22 28. Crosbie E, Sosa P, Glantz SA. Costa Rica's implementation of the Framework Convention on Tobacco  
23 Control: Overcoming decades of industry dominance. *Salud Publica Mex* 2016;58(1):62-70.  
24  
25 29. Crosbie E, Sosa P, Glantz SA. Defending strong tobacco packaging and labelling regulations in  
26 Uruguay: transnational tobacco control network versus Philip Morris International. *Tob Control*  
27 2017 doi: 10.1136/tobaccocontrol-2017-053690  
28  
29 30. Crosbie E, Sosa P, Glantz SA. The importance of continued engagement during the implementation  
30 phase of tobacco control policies in a middle-income country: the case of Costa Rica. *Tob Control*  
31 2017;26(1):60-68. doi: 10.1136/tobaccocontrol-2015-052701  
32  
33 31. Bump JB, Reich MR. Political economy analysis for tobacco control in low- and middle-income  
34 countries. *Health Policy Plan* 2013;28(2):123-33. doi: czs049 [pii]  
35  
36 10.1093/heapol/czs049 [published Online First: 2012/05/16]  
37  
38 32. Leischow SJ, Ayo-Yusuf O, Backinger CL. Converging research needs across framework convention on  
39 tobacco control articles: making research relevant to global tobacco control practice and policy.  
40 *Nicotine Tob Res* 2012;15(4):761-6. doi: nts199 [pii]  
41  
42 10.1093/ntr/nts199 [published Online First: 2012/09/20]  
43  
44 33. Sanders-Jackson AN, Song AV, Hiilamo H, et al. Effect of the Framework Convention on Tobacco  
45 Control and voluntary industry health warning labels on passage of mandated cigarette warning  
46 labels from 1965 to 2012: transition probability and event history analyses. *Am J Public Health*  
47 2013;103(11):2041-7. doi: 10.2105/AJPH.2013.301324 [published Online First: 2013/09/14]  
48  
49 34. Uang R, Hiilamo H, Glantz SA. Accelerated Adoption of Smoke-Free Laws After Ratification of the  
50 World Health Organization Framework Convention on Tobacco Control. *Am J Public Health*  
51 2016;106(1):166-71. doi: 10.2105/AJPH.2015.302872  
52  
53 35. Hiilamo H, Glantz S. FCTC followed by accelerated implementation of tobacco advertising bans. *Tob*  
54 *Control* 2016 doi: 10.1136/tobaccocontrol-2016-053007  
55  
56 36. Mahoney J. Path Dependence in Historical Sociology. *Theory and Society* 2000;29:507-48.  
57  
58 37. Blecher E. Targeting the affordability of cigarettes: a new benchmark for taxation policy in low-  
59 income and-middle-income countries. *Tob Control* 2010;19(4):325-30. doi:  
60 10.1136/tc.2009.030155  
38. Blecher E, Ross H, Leon ME. Cigarette affordability in Europe. *Tob Control* 2013;22(4):e6. doi:  
10.1136/tobaccocontrol-2012-050575  
39. Gilmore AB, Fooks G, Drope J, et al. Exposing and addressing tobacco industry conduct in low-income  
and middle-income countries. *Lancet* 2015;385(9972):1029-43. doi: 10.1016/S0140-  
6736(15)60312-9

- 1  
2  
3 40. Wipfli H. The Global War on Tobacco. Mapping the World's First Public Health Treaty. Baltimore:  
4 Johns Hopkins University Press 2016.  
5 41. Blecher E, Ross H, Stoklosa M. Lessons learned from cigarette tax harmonisation in the European  
6 Union. *Tob Control* 2014;23(e1):e12-4. doi: 10.1136/tobaccocontrol-2012-050728  
7  
8 42. Campaign for Tobacco-Free Kids. Tobacco tax success story: United Kingdom. Washington, 2012.  
9 43. Sinha DN, Gupta PC, Kumar A, et al. The poorest of poor suffer the greatest burden from smokeless  
10 tobacco use: A study from 140 countries. *Nicotine Tob Res* 2017 doi: 10.1093/ntr/ntx276  
11  
12  
13  
14  
15  
16  
17  
18  
19  
20  
21  
22  
23  
24  
25  
26  
27  
28  
29  
30  
31  
32  
33  
34  
35  
36  
37  
38  
39  
40  
41  
42  
43  
44  
45  
46  
47  
48  
49  
50  
51  
52  
53  
54  
55  
56  
57  
58  
59  
60

For peer review only

**FIGURE CAPTIONS**

Figure 1. Tobacco tax rates in 1998/1999 and 2014 as percent of retail price.

Figure 2. Shares of price of 100 cigarette packs of Gross Domestic Product per Capita in 1999 and 2014 as percent of retail price.

For peer review only

1  
2  
3  
4  
5  
6  
7  
8  
9  
10  
11  
12  
13  
14  
15  
16  
17  
18  
19  
20  
21  
22  
23  
24  
25  
26  
27  
28  
29  
30  
31  
32  
33  
34  
35  
36  
37  
38  
39  
40  
41  
42  
43  
44  
45  
46  
47  
48  
49  
50  
51  
52  
53  
54  
55  
56  
57  
58  
59  
60

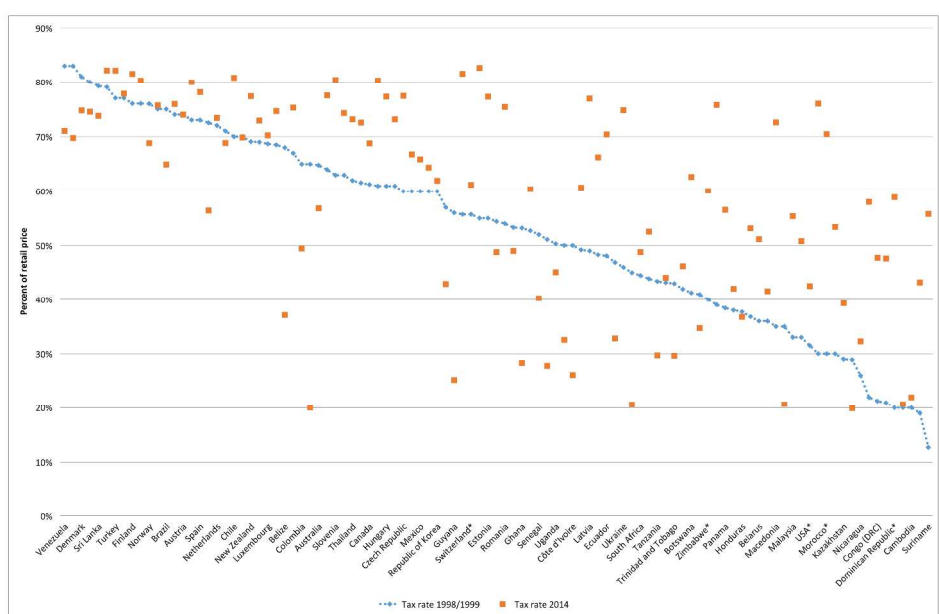

\* Country has not ratified FCTC.

Figure 1. Tobacco tax rates in 1998/1999 and 2014 as percent of retail price.

Caption : Figure 1. Tobacco tax rates in 1998/1999 and 2014 as percent of retail price.

504x377mm (300 x 300 DPI)

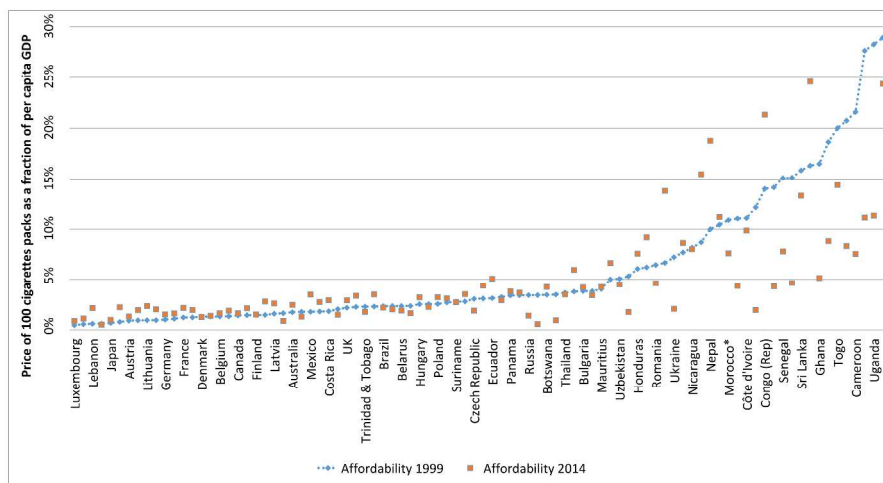

\* Country has not ratified FCTC.

Figure 2. Shares of price of 100 cigarette packs of Gross Domestic Product per Capita in 1999 and 2014 as percent of retail price.

Caption : Figure 2. Shares of price of 100 cigarette packs of Gross Domestic Product per Capita in 1999 and 2014 as percent of retail price.

504x313mm (300 x 300 DPI)

# BMJ Open

## LIMITED IMPLEMENTATION OF THE FRAMEWORK CONVENTION ON TOBACCO CONTROL'S TOBACCO TAX PROVISION: GLOBAL COMPARISON

|                                 |                                                                                                                                                                                                                                                                                                                                                                    |
|---------------------------------|--------------------------------------------------------------------------------------------------------------------------------------------------------------------------------------------------------------------------------------------------------------------------------------------------------------------------------------------------------------------|
| Journal:                        | <i>BMJ Open</i>                                                                                                                                                                                                                                                                                                                                                    |
| Manuscript ID                   | bmjopen-2017-021340.R3                                                                                                                                                                                                                                                                                                                                             |
| Article Type:                   | Research                                                                                                                                                                                                                                                                                                                                                           |
| Date Submitted by the Author:   | 13-Jul-2018                                                                                                                                                                                                                                                                                                                                                        |
| Complete List of Authors:       | Hiilamo, Heikki; University of Helsinki, Department of Social Research, social and public policy; VID Vitenskapelige Hogskole<br>Glantz, S; University of California, San Francisco, Center for Tobacco Control Research and Education, Philip R. Lee Institute for Health Policy Studies, Helen Diller Family Comprehensive Cancer Center, Department of Medicine |
| <b>Primary Subject Heading</b>: | Smoking and tobacco                                                                                                                                                                                                                                                                                                                                                |
| Secondary Subject Heading:      | Global health                                                                                                                                                                                                                                                                                                                                                      |
| Keywords:                       | tobacco industry, tobacco taxation, FCTC                                                                                                                                                                                                                                                                                                                           |
|                                 |                                                                                                                                                                                                                                                                                                                                                                    |

SCHOLARONE™  
Manuscripts



1  
2  
3 **LIMITED IMPLEMENTATION OF THE FRAMEWORK CONVENTION ON**  
4  
5 **TOBACCO CONTROL'S TOBACCO TAX PROVISION: GLOBAL COMPARISON**  
6  
7  
8  
9  
10

11  
12 Heikki Hiilamo<sup>ab</sup>, PhD  
13

14 Stanton Glantz<sup>c</sup>, PhD  
15

16  
17 <sup>a</sup> VID Specialized University, Oslo, Norway

18 <sup>b</sup> Social and public policy, Department of Social Research, 00014 University of Helsinki,  
19 Finland, heikki.hiilamo@helsinki.fi

20 <sup>c</sup> Center for Tobacco Control Research and Education, Philip R. Lee Institute for Health Policy  
21 Studies, Helen Diller Family Comprehensive Cancer Center, Department of Medicine  
22 University of California San Francisco, San Francisco, CA 94143-1390, stanton.glantz@ucsf.edu  
23  
24  
25  
26

27 Corresponding Author:  
28 Heikki Hiilamo, Professor  
29 University of Helsinki  
30 Department of Social Research  
31 Unioninkatu 37  
32 00014 Helsingin yliopisto  
33 Finland  
34 Tel. +358403587203  
35 Fax. +358294124835  
36 [heikki.hiilamo@helsinki.fi](mailto:heikki.hiilamo@helsinki.fi)  
37  
38  
39

40 Word count 3425  
41  
42  
43  
44  
45  
46  
47  
48  
49  
50  
51  
52  
53  
54  
55  
56  
57  
58  
59  
60

## ABSTRACT

**OBJECTIVE:** To quantify changes in tobacco tax rates and cigarette affordability after countries ratified the WHO Framework Convention on Tobacco Control (FCTC) using with the World Health Organization MPOWER standards. .

**METHODS:** We used logistic regression to assess the association of FCTC ratification with adoption of at least 50% and 75% (high) of retail price tobacco tax rates for the most sold brands in countries, accounting for years since ratification and other covariates. We also compared cigarette affordability in 2014 to 1999.

**RESULTS:** By 2014, 44% of high-income countries had taxes above 75% of retail value compared to 18% in 1998/1999. In fifteen years 69 countries increased the tobacco tax rate, 33 decreased it, and one had the same tax rate. FCTC ratification was not associated with implementing high tobacco taxes. More fragile countries in terms of security, political, economic, and social development were less likely to have at least 50% and 75% tobacco tax rates in 2014 compared with 1999. The higher the cigarette prices in 1999 the less likely the countries were to have at least 75% tobacco tax rates in 2014. However, cigarettes were less affordable in 2014 than in 1999 in countries that had ratified FCTC earlier.

**CONCLUSIONS:** Despite widespread FCTC ratification, implementing higher tobacco taxes remains incomplete. Guidelines for FCTC Article 6 implementation should assign definite targets for tobacco taxes and for implementation of a tax escalator that gradually increases taxes to match rising income levels. Fragile countries are less likely to have high tobacco taxes and less affordable cigarettes. The tobacco control community should intensify efforts to help fragile countries improve performance in FCTC implementation both through strengthening their administrative and technical capacity and through supporting basic functions of government.

### STRENGTHS AND LIMITATIONS OF THIS STUDY

- We were able to assess changes in tobacco taxes and prices over 15 years in 103 countries.
- We used WHO's own standards for effective tax rates.
- The willingness and ability of states to implement effective tobacco taxes was measured through state fragility index.
- The limitation of the study is that we could not analyze how the tobacco companies respond to the tax increase.
- The baseline data came from two different data sources.

## INTRODUCTION

Raising tobacco taxes is an effective strategy to reduce tobacco use<sup>1-3</sup>. On average a 10% price increase will reduce tobacco use by 4% in high income countries and by 5% among low- and middle-income countries.<sup>4</sup> Article 6 of the World Health Organization (WHO) Framework Convention on Tobacco Control<sup>5</sup> (FCTC) commits parties to implement “tax policies and, where appropriate, price policies, on tobacco products so as to contribute to the health objectives aimed at reducing tobacco consumption.”<sup>5</sup> Article 6 implementation Guidelines<sup>6</sup> recommend tax policies which take into account tobacco products’ price elasticity (the rate by which tobacco consumption decreases as result of price increases) and income elasticity (the sensitivity of tobacco consumption to income changes) to make tobacco products less affordable over time, but does not set specific targets for taxes or prices.

Tobacco industry tactics to block tax increases have a major influence on tax rates and industry responses to tax increases have a major effect on cigarette prices. Tobacco taxes are politically difficult to raise because tobacco companies fight tax increases<sup>2</sup> by commissioning research claiming economic benefits of tobacco, creating alliances,<sup>7</sup> including with progressive organizations,<sup>8</sup> lobbying ministries of finance with poor knowledge of public health and FCTC requirements,<sup>9</sup> and arguing tax increases drive illicit trade<sup>2</sup> and hurt disadvantaged groups.<sup>8 10 11</sup> They also learned how to cope with tax increases and sometimes actually benefit from them by overshifting taxes on premium brands to increase profits while downshifting taxes on ultra-low-price brands to cushion the effects of tax increases on total consumption.<sup>12-15</sup> Even a series of substantial tax increases, such as in Australia<sup>16</sup>, may not increase the tax rate if the industry keeps overshifting tax increases to prices. In this sense, tax rates can be a relatively poor indicator of cigarette prices.

1  
2  
3 WHO established the MPOWER measures in 2008 to scale up key FCTC demand  
4  
5 reduction measures including tobacco taxes. MPOWER emphasizes that “increasing the price of  
6  
7 tobacco through higher taxes is the single most effective way to encourage tobacco users to quit  
8  
9 and prevent children from starting to smoke.”<sup>2</sup> A key finding of the 2015 MPOWER report was  
10  
11 that taxes were the least implemented MPOWER measure with only 10% of the world’s  
12  
13 population (living in 33 countries) covered by taxes of at least 75% of retail price<sup>2</sup>. This paper  
14  
15 assesses the association of FCTC ratification with implementing tobacco taxes by analyzing  
16  
17 changes in tax rate using the MPOWER standard and cigarette affordability. In addition, we  
18  
19 assess the role of state capacity and previous tax and price levels<sup>17 18</sup> on taxes in 2014.  
20  
21  
22  
23

## 24 **METHODS**

### 25 **Data**

26  
27 Data on the tobacco tax rate, including specific excise, ad valorem excise, import duties,  
28  
29 value added tax, and other taxes were obtained from the World Health Organization Report on  
30  
31 the Global Tobacco Epidemic 2015 public dataset for 2014.<sup>19</sup> This dataset includes information  
32  
33 collected by WHO in-country experts as of 31 December 2014 on the prices of the most-sold  
34  
35 brand of cigarettes (both in local currency and in US dollars) and cigarette taxes. Information on  
36  
37 the taxation of cigarettes (and when possible, most commonly used tobacco products) was  
38  
39 collected from ministries of finance. (Because WHO did not report tax data for Syria in 2014 we  
40  
41 used the data from 2012 for 2014.) In countries where different taxes applied to cigarettes based  
42  
43 on length, quantity produced, or type (e.g., filter vs. non-filter), the rate that applied to the most  
44  
45 popular brand was used to calculate the tax rate.  
46  
47  
48  
49  
50

51 We obtained baseline pre-FCTC taxes using the 1999 World Bank (WB) survey of 64  
52  
53 countries that reported the share of cigarette taxes (including value added tax, VAT) as a  
54  
55  
56  
57  
58  
59  
60

1  
2  
3 percentage of the retail price of a pack of cigarettes<sup>20</sup> supplemented by the tobacco industry's  
4  
5 International Tobacco Documentation Centre's<sup>21</sup> 1998 *International Fiscal Guide to Tobacco*  
6  
7 that mapped international taxation, price and tariff policies.<sup>22</sup>  
8  
9

10 Tobacco tax rate is the portion of the price represented by all taxes (including VAT for  
11  
12 the most-sold brand of cigarettes, is our outcome variable. We studied two outcome variables  
13  
14 derived from MPOWER standards in the *WHO Report on the Global Tobacco Epidemic 2015:*  
15 *Raising Taxes on Tobacco:* (1) taxes that totaled at least 75% of retail price, the highest  
16  
17 MPOWER standard<sup>2</sup>, and (2) taxes that totaled at least 50% of retail price, the second highest  
18  
19 standard.<sup>2</sup> FCTC Article 6 does not set targets on tobacco prices. The expectation in FCTC and  
20  
21 MPOWER is that if the manufacturers increase wholesale prices so that the overall tax rate drops  
22  
23 below 75% or 50%, the government would increase taxes so that the tax share would go above  
24  
25 75% or 50%.  
26  
27  
28  
29

30  
31 To analyze the income level of the countries we used World Bank (WB) 2016 gross  
32  
33 national income (GNI) categories:<sup>23</sup> low-income countries were defined as those with a GNI per  
34  
35 capita of \$1,045 or less in 2014; middle-income economies, \$1,046 to \$12,735; high income,  
36  
37 \$12,736 or more. Lower-middle-income and upper-middle-income economies were separated at  
38  
39 a GNI per capita of \$4,125. Since our sample included only eight low-income countries, after  
40  
41 cross tabulation analysis we combined low income and lower middle-income categories in the  
42  
43 regression analysis. We used information on cigarette prices expressed in nominal US dollars in  
44  
45 1998/1999.  
46  
47  
48

49 We analyzed the association of FCTC with affordability of cigarettes by using the  
50  
51 fraction of per capita gross domestic product (GDP) that would be needed to buy 100 packs of  
52  
53 the most sold cigarette brand. This method is a more comprehensive and representative measure  
54  
55  
56  
57

1  
2  
3 of income across countries in different income levels than, for example surveys of wages.<sup>24</sup>We  
4 used price data described above and World Bank data for GDP per capita for 1999 and 2014.<sup>23</sup> In  
5  
6 addition, we used the growth of GDP per capita from 1999 to 2014<sup>23</sup> ( $[(2014 \text{ GDP} - 1999$   
7  
8 GDP]/1999 GDP, GDP expressed in 2014 US dollars) as an independent variable on the  
9  
10 assumption that cigarettes would be more affordable in 2014 among those countries where the  
11  
12 rise in income level was the fastest. We assume that changes in GDP over the 16-year period  
13  
14 reflect changes in disposable income.  
15  
16  
17

### 18 19 **Other Variables**

20  
21 To study the willingness and ability of states to implement public policies we used  
22  
23 Marshall and Cole's<sup>25</sup> state fragility index. This index scores all countries with population above  
24  
25 500,000 in four performance dimensions: security, political, economic, and social. Previous  
26  
27 literature has shown that state fragility matters for implementing effective cigarette health  
28  
29 warnings.<sup>17 18</sup> The index gives higher scores for more fragile countries (Sudan scored 23 while  
30  
31 the 15 most stable countries scored 0) but does not place countries into different categories. We  
32  
33 averaged scores for 2007, 2010 and in 2013 to test whether more fragile countries were less  
34  
35 likely to have high tobacco taxes in 2014. By more fragile countries we refer to those countries  
36  
37 which score higher on Marshall and Cole's state fragility index.  
38  
39  
40  
41

42 We studied the role of previous tax and price levels on tax rate in 2014 with two  
43  
44 variables, tobacco tax rates in 1998/1999 and price of most sold cigarette packs in US dollars in  
45  
46 1998/1999. We tested whether countries with higher cigarette taxes and higher price cigarettes in  
47  
48 1998/1999 were more likely to have high tax rates in 2014.  
49  
50

### 51 **Statistical Analysis**

1  
2  
3 Logistic regression was used in separate analyses with 75% and 50% tax rates in 2014 as  
4 the outcome variable. We studied the effect of FCTC by calculating the number of years since  
5 FCTC ratification as of 2014. We set years since ratification to 0 for countries that ratified the  
6 FCTC in 2014 (El Salvador, Ethiopia and Zimbabwe), had signed but not ratified the FCTC as of  
7 the end of 2014 (Argentina, Cuba, Haiti, Morocco, Mozambique, Switzerland and the United  
8 States), or had not signed or become parties to the FCTC by January 2016 (Andorra, Dominican  
9 Republic, Eritrea, Indonesia, Liechtenstein, Malawi, Monaco, Somalia). Countries that already  
10 had a tax rate of 50% (final sample used N=44) or 75% (N=88) in 1998/1999 were excluded  
11 from the analysis.  
12  
13  
14  
15  
16  
17  
18  
19  
20  
21  
22  
23

24 Our analysis has 80% statistical power (with  $\alpha=.05$ ) to detect an OR by a factor of 1.25  
25 (or 0.80) associated with FCTC ratification.  
26  
27

28 We also used logistic regression to analyze the effect of the FCTC on cigarette  
29 affordability by assigning a value of 1 for those countries where cigarettes were less affordable  
30 in 2014 than in 1999 and 0 where cigarettes were more affordable. We tested interaction between  
31 state capacity and FCTC ratification to see if more fragile countries were slower in ratifying  
32 FCTC. We also ran a sensitivity analysis to test if cigarettes are less affordable in countries with  
33 extensive tobacco control measures.  
34  
35  
36  
37  
38  
39  
40  
41

42 We used R functions `glm` and `minEffect.VSMc.logistic` from `powerMediation` for the  
43 analysis.  
44  
45

#### 46 **Patient and Public Involvement**

47 Patients or public were not involved in the study.  
48  
49

#### 50 **RESULTS**



Tobacco tax rates have not uniformly increased from 1998/1999 to 2014 as shown in Figure 1 where the countries are ranked by their tax rate in 1998/1999. The average tax rate increased from 53% of the price of the most sold cigarette brands in 1998/1999 to 58% in 2014. In those fifteen years 69 countries increased the tobacco tax rate, 33 decreased it (30 FCTC ratifying countries), and one country (Austria) had the same tax rate.

In 1998/1999 only 8 (18%) of high-income, 2 (8%; Brazil and Costa Rica) upper-middle-income, one lower-middle-income country (4%, Sri Lanka), and none of the low-income countries had a tax above 75% of the retail price (Table 1). By 2014, 44% of high-income countries had taxes above 75% of retail value. The progress was slow among higher- and lower-middle-income countries with just one additional country complying in each income category and no low-income country.

In 1998/1999 37 (82%) of high-income countries had taxes that comprised above 50% of retail price, while only 11 (46%) of higher-middle-income countries, 9 (35%) of lower-middle-income countries, and two (23%) low-income country had that tax rate. By 2014 39 (87%) of high-income countries had taxes above 50% of retail price, as did 16 (67%) of upper-middle - income countries, 13 (50%) of lower-middle-income countries, and 1 (13%) low-income country (Zimbabwe).

|                            | Tobacco tax > 75% (high) |    |                       | Tobacco tax > 50% |    |                       |
|----------------------------|--------------------------|----|-----------------------|-------------------|----|-----------------------|
|                            | Yes                      | No | Fraction of countries | Yes               | No | Fraction of countries |
| <b>High-income</b>         |                          |    |                       |                   |    |                       |
| 1998/1999                  | 8                        | 37 | 18%                   | 37                | 8  | 82%                   |
| 2014                       | 20                       | 25 | 44%                   | 39                | 7  | 87%                   |
| <b>Upper-middle-income</b> |                          |    |                       |                   |    |                       |

|                                                                                                                                                                                                                                                                                                                                                                                                                                                                                                                                                                                                                                                                                                                                                                                                                                                                                                                                                                  |   |    |     |    |    |     |
|------------------------------------------------------------------------------------------------------------------------------------------------------------------------------------------------------------------------------------------------------------------------------------------------------------------------------------------------------------------------------------------------------------------------------------------------------------------------------------------------------------------------------------------------------------------------------------------------------------------------------------------------------------------------------------------------------------------------------------------------------------------------------------------------------------------------------------------------------------------------------------------------------------------------------------------------------------------|---|----|-----|----|----|-----|
| 1998/1999                                                                                                                                                                                                                                                                                                                                                                                                                                                                                                                                                                                                                                                                                                                                                                                                                                                                                                                                                        | 2 | 22 | 8%  | 11 | 13 | 46% |
| 2014                                                                                                                                                                                                                                                                                                                                                                                                                                                                                                                                                                                                                                                                                                                                                                                                                                                                                                                                                             | 3 | 21 | 13% | 16 | 8  | 67% |
| Lower-middle-income                                                                                                                                                                                                                                                                                                                                                                                                                                                                                                                                                                                                                                                                                                                                                                                                                                                                                                                                              |   |    |     |    |    |     |
| 1998/1999                                                                                                                                                                                                                                                                                                                                                                                                                                                                                                                                                                                                                                                                                                                                                                                                                                                                                                                                                        | 1 | 25 | 4%  | 9  | 17 | 35% |
| 2014                                                                                                                                                                                                                                                                                                                                                                                                                                                                                                                                                                                                                                                                                                                                                                                                                                                                                                                                                             | 1 | 25 | 4%  | 13 | 13 | 50% |
| Low-income                                                                                                                                                                                                                                                                                                                                                                                                                                                                                                                                                                                                                                                                                                                                                                                                                                                                                                                                                       |   |    |     |    |    |     |
| 1998/1999                                                                                                                                                                                                                                                                                                                                                                                                                                                                                                                                                                                                                                                                                                                                                                                                                                                                                                                                                        | 0 | 8  | 0%  | 2  | 6  | 23% |
| 2014                                                                                                                                                                                                                                                                                                                                                                                                                                                                                                                                                                                                                                                                                                                                                                                                                                                                                                                                                             | 0 | 8  | 0%  | 1  | 7  | 13% |
| <p>45 countries changed WB status during the observation period. The following countries changed from low-income countries to lower-middle income countries: Bangladesh, Cambodia, Cameroon, Côte d'Ivoire, Ghana, Honduras, India, Kenya, Lesotho, Nicaragua, Nigeria, Pakistan and Vietnam. The following countries changed from lower-middle income countries to upper-middle income countries: Algeria, Belarus, Belize, Bulgaria, Columbia, Costa Rica, Dominican Republic, Ecuador, Fiji, Guyana, Jamaica, Kazakhstan, Macedonia, Namibia, Panama, Romania, Russia, Suriname and Thailand. The following countries changed from upper-middle-income countries to high income countries: Barbados, Chile, Czech Republic, Estonia, Hungary, Malta, Poland, Republic of Korea, Slovakia, Trinidad and Tobago and Uruguay. Latvia and Lithuania changed from lower-income countries to high-income countries. No country changed to a lower income group.</p> |   |    |     |    |    |     |

The logistic regression showed that time since FCTC ratification was not associated with implementing high tobacco taxes (Table 2). More fragile countries were less likely to have 75% and 50% tobacco tax rates in 2014. Countries with higher cigarette prices in 1998/1999 were more likely to have 75% tax rates in 2014. Countries with higher tax rates in 1998/1999 were more likely than countries with lower tax rates in 1998/1999 to have 75% tobacco tax rates in 2014. To test overall effects we calculated a linear regression model for all countries in our sample with tax rates in 2014 as the dependent variable and FCTC ratification, tax rate in 1999, price in 1999 and state capacity as independent variables ( $R^2 = 0.48$ ). FCTC ratification and price were not statistically significant ( $P > 0.7$  and  $P > 0.3$  respectively). The coefficients for tax rate in 1999 were 0.40 ( $p < 0.001$ ) and for state capacity -1.58 ( $p < 0.001$ ). The variance inflation

factors in the first model ranged from 1.08 to 1.68 and in the second model from 1.04 to 1.12, well below the threshold for multicollinearity concern.

As a sensitivity analysis, we also ran OLS regression with actual tax rate in 2014 as the dependent variable for the whole sample. We used the same independent variables as in logit analysis. Tax rate in 1999 was positively associated with tax rate in 2014 (coeff. 0.41,  $p=0.0003$ ) and lack of state capacity was negatively associated with tax in 2014 (coeff. -1.52,  $p=0.00001$ ). The results were essentially the same as the logistic regression analysis.

**Table 2. Odds of passing high standard tobacco taxes by 2014 (among non-compliant countries in 1998/1999)**

| Variable                           | Tobacco tax $\geq$ 75% of retail price (high) |             | Tobacco tax $\geq$ 50% of retail price |             |
|------------------------------------|-----------------------------------------------|-------------|----------------------------------------|-------------|
|                                    | Odds ratio                                    | 95% CI      | Odds ratio                             | 95% CI      |
| Years since FCTC ratification      | 1.04                                          | (0.81-1.43) | 0.94                                   | (0.76-1.15) |
| Tax rate in 1998/1999              | 1.07*                                         | (1.00-1.14) | 1.01                                   | (0.94-1.08) |
| Price in 1998/1999                 | 0.31*                                         | (0.10-0.73) | 0.78                                   | (0.22-2.78) |
| State capacity                     | 0.67**                                        | (0.49-0.83) | 0.86*                                  | (0.74-0.99) |
| Number of countries (observations) | 88                                            |             | 62                                     |             |

\*  $P \leq 0.05$ , \*\*  $P \leq 0.01$ , Numbers in parentheses are 95% confidence intervals.

There were large differences in affordability of cigarettes across countries in both 1999 and 2014 (Figure 2). At the lower end of the range, in 2014 less than one percent of per capita GDP was required to buy 100 packs of the most sold cigarette brands in Luxembourg, while at the upper end in Tanzania the corresponding figure was 24.6% (28.9% in 1999). Cigarettes become less affordable between 1999 and 2014 in 51 countries and more affordable in 40 countries. Cigarettes had become less affordable in 73% of high-income countries (27/37), 61% of upper-middle-income countries (14/23) and 31% of lower-middle- and low-income countries

(10/32). Ratifying the FCTC earlier was associated with cigarettes becoming less affordable in 2014 implying perhaps that countries with affordable cigarette prices in 1999 were quicker to ratify the FCTC and implement its tax provision (Table 3). Cigarettes became more affordable in countries with high rates of per capita GDP growth between 1999 and 2014. Lack of state capacity was associated with lower odds for having less affordable cigarettes. The variance inflation factors ranged from 1.04 to 1.10, indicating no multicollinearity problems.

As a sensitivity analysis, we also ran OLS regression with cigarette affordability in 2014 as the dependent variable for the whole sample. We used the same independent variables as in logit analysis. The direction of association was again similar as in logit analysis. Ratifying the FCTC earlier was positively associated with cigarettes becoming less affordable in 2014 (coeff.0.04, p=0.03), while GDP growth (coeff.-0.10, p=0.001) and lack of state capacity (coeff.-0.02, p=0.001) were negatively associated with having less affordable cigarettes.

| <b>Table 3. Odds of cigarettes being less affordable by 2014</b>                          |            |             |
|-------------------------------------------------------------------------------------------|------------|-------------|
| Variable                                                                                  | Odds ratio | 95% CI      |
| Years since FCTC ratification                                                             | 1.23*      | (1.02-1.50) |
| GDP per capita growth from 1999 to 2014                                                   | 0.48**     | (0.28-0.75) |
| State capacity                                                                            | 0.90*      | (0.82-0.99) |
| Number of countries (observations)                                                        | 91         |             |
| * $P \leq 0.05$ , ** $P \leq 0.01$ , Numbers in parentheses are 95% confidence intervals. |            |             |

## DISCUSSION

Our results confirm earlier findings showing slow progress in meeting the 75% or 50% tobacco tax rate targets among low- and middle-income countries.<sup>2 26</sup> Likewise, our results support concerns<sup>2</sup> that FCTC Article 6 has not, in general, led countries to implement high tobacco taxes. Lack of success can be partly attributed to state fragility. More fragile countries in

1  
2  
3 terms of security, political, economic, and social development may not have administrative and  
4 technical capacity to implement high tobacco taxes.<sup>27-30</sup> We did not detect an interaction between  
5 state capacity and time since FCTC ratification, which indicates that weak state capacity as such  
6 may not prevent countries from ratifying FCTC. Promoting the FCTC should include  
7 strengthening of the basic functions of government.<sup>31 32</sup>

8  
9  
10 Countries with higher tax rates in 1998/1999 were more likely to have at least a 75% tax  
11 rate in 2014. Increasing tobacco taxes requires determined action from governments. Countries  
12 that had higher tobacco taxes before the FCTC continued to do so also after ratifying it. The  
13 results indicate a path-dependency in tobacco taxation policies.<sup>33-35</sup> The passing of tobacco tax  
14 policies is a contingent event that sets into motion institutional patterns that have deterministic  
15 properties.<sup>36</sup> The result emphasizes the importance of intensifying efforts to implement high  
16 tobacco taxes especially in countries with originally low tax rates.

17  
18 Surprisingly, lower, not higher, cigarette prices in 1998/1999 were associated with 75%  
19 tobacco tax rates in 2014 (Table 2). Countries with low cigarette prices in 1998/1999 may have  
20 reached the target with regular inflationary adjustments. This association may also reflect a  
21 possible ceiling effect where governments are reluctant to increase tobacco taxes if the cigarettes  
22 are already relatively expensive. This could also result from tobacco industry lobbying.<sup>2 7-9</sup>  
23 FCTC Article 6 and its implementation Guidelines expressly emphasize health goals in  
24 determining tobacco taxation but governments may try to maintain popular support through  
25 adopting small tobacco tax increases instead of large increases. The health groups play an  
26 important role in creating awareness and building capacity for FCTC implementation.<sup>37 38 30</sup> It is  
27 also possible that that it is easier for a country to reach the 75% tax rate if the price was low  
28 before the tax increase.

1  
2  
3 Consistent with earlier studies on cigarette affordability, cigarettes were more affordable  
4  
5 in 2014 than in 1999 despite tax increases.<sup>2 24 39 40</sup> Our paper includes data collected well after  
6  
7 2010, so we were able base our analysis on a longer time horizon than earlier analyses and  
8  
9 thereby confirm well-established trend in cigarette affordability. Countries that ratified FCTC  
10  
11 earlier on average had less affordable cigarettes in 2014. The results seem to contradict the  
12  
13 earlier finding of the non-significant association of FCTC ratification with having high cigarette  
14  
15 taxes. It may well be that the FCTC prompted countries to increase tobacco taxes but not enough  
16  
17 to obtain 50% or 75% tax rates. It is also possible that countries with already high tax rates were  
18  
19 more likely to ratify FCTC earlier. If we include 199 tobacco tax rates in the model, FCTC  
20  
21 ratification remains statistically significant.  
22  
23  
24  
25

26  
27 There are many different ways that one could define an “effective” tax rate, including  
28  
29 70% tax rate as specified in the WHO Technical Manual on Tobacco Tax Administration (1).  
30  
31 The MPOWER set a target of 75% of price. Because this is a paper on the effect that the FCTC  
32  
33 had on tax policy, we used the WHO’s own standard of success as defined in MPOWER. The  
34  
35 MPOWER measures for effective tax rates are arbitrary and different measures could be also  
36  
37 used.  
38  
39

40  
41 Our results emphasize the role of economic development in preventing cigarettes from  
42  
43 becoming less affordable. If incomes rise quickly, cigarettes become more affordable even if  
44  
45 taxes are kept constant.<sup>2 24</sup> This development is reflected in our result where rapid per capita  
46  
47 GDP growth between 1999 and 2014 was associated with more affordable cigarettes in 2014.  
48  
49 Among those 14 countries where the per capita GDP increased more than 300% in 15 years,  
50  
51 cigarettes were less affordable in just three countries. In fact, the weakness of set tobacco tax rate  
52  
53 targets, for example 50% of retail price, is that they do not take into account the effect of rising  
54  
55  
56  
57  
58  
59  
60

1  
2  
3 incomes or industry pricing behavior. Keeping other factors constant the demand for cigarettes  
4 generally increases with the average level of income, especially in developing countries.<sup>24</sup>  
5  
6

7  
8 Lack of state capacity was associated with both lower odds for having high tobacco taxes  
9 and less affordable cigarettes. Tobacco taxes are low and cigarettes are affordable in more fragile  
10 countries, while taxes are high and cigarettes less affordable in more stable countries. As of  
11  
12 2018, the multinational tobacco companies were targeting countries in Asia and Africa with  
13  
14 young populations and relatively low smoking prevalence, especially among women.<sup>41</sup>  
15  
16  
17  
18

19 The tax provisions in the FCTC do not include specific tax targets.<sup>5</sup> The unwillingness of  
20  
21 FCTC parties to commit to minimum tax levels during FCTC negotiations is reflected in the lack  
22  
23 of subsequent action.<sup>42</sup> FCTC Guidelines for Article 6 implementation recommend that Parties  
24  
25 should take into account “both price elasticity and income elasticity of demand, as well as  
26  
27 inflation and changes in household income, to make tobacco products less affordable over time  
28  
29 in order to reduce consumption and prevalence.”<sup>5</sup> Our results demonstrate that current policies  
30  
31 for implementing tobacco taxes fail to meet this recommendation.  
32  
33  
34

35 In our sample cigarettes became more affordable from 1999 to 2014. Taking the FCTC  
36  
37 Guideline recommendation seriously would entail the Conference of the FCTC Parties assigning  
38  
39 definite targets not only for tobacco tax rates but also for measures that prevent tobacco products  
40  
41 from becoming more affordable.  
42  
43

44 The effect of cigarettes becoming more affordable with rapid income rises can be  
45  
46 prevented by adopting adequate policies.<sup>39 40 43</sup> One example is a tax escalator which is adjusted  
47  
48 to income growth or an equivalent variable that accounts for increases in consumer purchasing  
49  
50 power.<sup>2</sup> Such a tax escalator is already in place in the UK.<sup>44</sup> With automatically increasing  
51  
52 tobacco taxes by the increase in purchasing power the tobacco companies would increase prices,  
53  
54  
55  
56  
57

1  
2  
3 which would prevent tobacco products not becoming more affordable. To allow this process to  
4 take place tobacco taxes rates could, at least temporarily, rise even above the 75% standard.  
5

6  
7 Another option is to set a tax for each brand guaranteeing a 75% tax for every product. Doing so  
8 would make it more difficult for tobacco companies to downshift tax increases.  
9

## 10 11 12 **Limitations**

13  
14 Assessing the change in tax as a share of price over time can be complicated.<sup>19</sup>

15  
16 Determination of tax rates as a proportion of total cigarette retail price is dependent on changes  
17 in tax rates but also on changes in wholesale prices. Consequently, despite an increase in the tax  
18 on cigarettes, the share of excise and total taxes in the retail price could remain the same or  
19 shrink depending on how the tobacco companies respond to the tax increase. Similarly, the share  
20 of taxes in the final retail price might increase, even if there is no change in the tax levied on a  
21 pack of cigarettes. The FCTC might have prompted countries to increase tobacco taxes but not  
22 enough, given that the FCTC did not specify 50/75% tax rates as a requirement.  
23  
24  
25  
26  
27  
28  
29  
30  
31  
32

33 The Article 6 Guidelines were adopted in 2014, nine years after the FCTC entered force  
34 and may have delayed Parties' attention to implementing tax increases. Other analyses of health  
35 warning labels<sup>18 33</sup> (Article 11), smokefree policies<sup>34</sup> (Article 8) and advertising bans<sup>35</sup> (Article  
36 13), however, demonstrated an effect of FCTC ratification without considering the delay in  
37 adoption of the implementing guidelines for these articles.  
38  
39  
40  
41  
42  
43

44 To establish a baseline before FCTC we used tobacco tax and price data from two  
45 different sources, World Bank survey from 1999<sup>20</sup> and the International Tobacco Documentation  
46 Centre's<sup>21</sup> 1998 *International Fiscal Guide to Tobacco*. Both data sources include information  
47 on retail price of the most-sold cigarette brand. The high correlation (0.947) for overlapping  
48 price information indicates the data was collected in a substantially uniform manner. The  
49  
50  
51  
52  
53  
54  
55  
56  
57  
58  
59  
60



1  
2  
3 correlation for tax data was lower, 0.676). This lower correlation could indicate a measurement  
4 error in the datasets or it could indicate that tobacco taxes increased from 1998 to 1999 more  
5 dramatically than cigarette prices. Given the more reliable international standing we deemed the  
6 World Bank survey more reliable than the *International Fiscal Guide to Tobacco* produced by  
7 the tobacco industry. We focused on the price and tax for the most-sold cigarette brand on all  
8 data sources including WHO data for 2014,<sup>19</sup> but were unable to confirm that definitions  
9 remained stable over time. The most-sold cigarette may not fully describe the effect of tobacco  
10 taxation to tobacco consumption. We did not analyze the tax structure. Our outcome variable, the  
11 share of all tobacco taxes of the most sold brand, does not fully capture the role of taxes in  
12 reducing demand for tobacco. Earlier research has shown the tobacco industry may  
13 simultaneously absorb the tax increases on its cheapest brands while over-shifting taxes on  
14 premium brands.<sup>12</sup> The higher the level of the excise and other taxes the less room for tobacco  
15 industry price differentiation strategies. We were not able to analyze how countries' tax policies  
16 have accounted for country-specific price and income elasticities.

17  
18  
19 In this study we were not able to assess the causal effects. Besides the variables used in  
20 this study other factors such as economic cycles, political leadership and tobacco control activity  
21 outside of FCTC may have affected the outcome variables.

22  
23  
24 Our analysis focused only on cigarettes ignoring other categories of tobacco products,  
25 some of which (for example bidi) are more prevalent in more fragile countries such as  
26 Bangladesh and India<sup>45</sup>. Since we had data only from two time points we were not able to assess  
27 trends in tax, price and affordability in prior periods.

## 28 **Conclusions**

1  
2  
3 In contrast to advertising restrictions,<sup>33 35</sup> health warning labels,<sup>33</sup> and smokefree  
4 environments,<sup>34</sup> FCTC ratification has not been systematically followed regarding higher  
5 tobacco taxation. FCTC Article 6 does not stipulate specific tax rates. MPOWER tax rate targets  
6 were not introduced before 2008. The more specific FCTC Articles 8, 11 and 13 discuss smoke  
7 free environments, health warnings and advertising bans that fall into domain of health  
8 government, while Article 6 concerns financial policy, which falls under finance ministries.  
9 There need to be further efforts to increase financial ministries' knowledge of and responsibility  
10 to implement Article 6. Fragile countries are less likely to have high tobacco taxes. Rapid rise in  
11 incomes undermines the effectiveness of tobacco taxes. Guidelines for FCTC Article 6  
12 implementation should assign definite targets for tobacco taxes and for the implementation of a  
13 tax escalator that gradually increases taxes to match the rising income levels. The tobacco  
14 control community should collaborate with other parts of civil society to intensify efforts to help  
15 more fragile countries to improve performance in FCTC implementation both through  
16 strengthening their administrative and technical capacity and through supporting the basic  
17 functions of government. The FCTC Conference of the Parties should assign definite targets not  
18 only for tobacco tax rates but also for measures to prevent tobacco products from becoming more  
19 affordable.  
20  
21  
22  
23  
24  
25  
26  
27  
28  
29  
30  
31  
32  
33  
34  
35  
36  
37  
38  
39  
40

## 41 42 **FUNDING**

43  
44 This work was supported by National Cancer Institute grant CA-087472. The funding  
45 agency played no role in the conduct of the research or preparation of the manuscript.  
46  
47  
48

## 49 **COMPETING INTERESTS**

50  
51 There are no competing interests.  
52  
53

## 54 **CONTRIBUTORSHIP**

1  
2  
3 HH developed the idea for this study and carried out the data collection. HH and SG  
4  
5 carried out the data analysis and wrote and revised the manuscript.  
6

7  
8 **DATA SHARING STATEMENT**  
9

10 No data is shared since we are using data which is already made public.  
11  
12  
13  
14  
15  
16  
17  
18  
19  
20  
21  
22  
23  
24  
25  
26  
27  
28  
29  
30  
31  
32  
33  
34  
35  
36  
37  
38  
39  
40  
41  
42  
43  
44  
45  
46  
47  
48  
49  
50  
51  
52  
53  
54  
55  
56  
57  
58  
59  
60

For peer review only

## REFERENCES

1. World Health Organization. WHO technical manual on tobacco tax administration. Geneva, 2010.
  2. World Health Organization. WHO Report on the Global Tobacco Epidemic 2015: Raising taxes on tobacco. Geneva: World Health Organization, 2015.
  3. Jha P, Chaloupka FJ. The economics of global tobacco control. *BMJ* 2000;321(7257):358-61.
  4. International Agency for Research on Cancer. IARC handbooks of cancer prevention: tobacco control. Volume 14: effectiveness of tax and price policies for tobacco control Lyon, France: IARC; 2011 [
  5. World Health Organization. Framework Convention on Tobacco Control. Geneva2003.
  6. FCTC/COP/6/7. Guidelines for implementation of Article 6 of the WHO FCTC2014.
  7. Campbell RB, Balbach ED. Cigarette Excise Taxes in Context: Cautionary Lessons from the U.S. Experience. *Int J Health Serv* 2015;45(3):564-77. doi: 10.1177/0020731415584553
  8. Campbell RB, Balbach ED. Building alliances in unlikely places: progressive allies and the Tobacco Institute's coalition strategy on cigarette excise taxes. *Am J Public Health* 2009;99(7):1188-96. doi: 10.2105/AJPH.2008.143131
  9. Smith KE, Savell E, Gilmore AB. What is known about tobacco industry efforts to influence tobacco tax? A systematic review of empirical studies. *Tob Control* 2013;22(2):144-53. doi: 10.1136/tobaccocontrol-2011-050098
  10. Campbell R, Balbach ED. Mobilising public opinion for the tobacco industry: the Consumer Tax Alliance and excise taxes. *Tob Control* 2008;17(5):351-6. doi: 10.1136/tc.2008.025338
  11. Koch SF. Quasi-experimental evidence on tobacco tax regressivity. *Soc Sci Med* 2018;196:19-28. doi: 10.1016/j.socscimed.2017.11.004
  12. Gilmore AB, Tavakoly B, Taylor G, et al. Understanding tobacco industry pricing strategy and whether it undermines tobacco tax policy: the example of the UK cigarette market. *Addiction* 2013;108(7):1317-26. doi: 10.1111/add.12159
  13. Chaloupka FJ, Cummings KM, Morley CP, et al. Tax, price and cigarette smoking: evidence from the tobacco documents and implications for tobacco company marketing strategies. *Tob Control* 2002;11 Suppl 1:162-72.
  14. Brock B, Choi K, Boyle RG, et al. Tobacco product prices before and after a statewide tobacco tax increase. *Tob Control* 2016;25(2):166-73. doi: 10.1136/tobaccocontrol-2014-052018
  15. Alamar B, Mahmoud L, Glantz SA. Cigarette Smuggling in California: Fact and Fiction. Tobacco Control Policy Making: United States. San Francisco: Center for Tobacco Control Research and Education, UC San Francisco, 2003.
  16. Hirono KT, Smith KE. Australia's \$40 per pack cigarette tax plans: the need to consider equity. *Tob Control* 2017 doi: 10.1136/tobaccocontrol-2016-053608
  17. David PA. Clio and the Economics of QWERTY. *The American Economic Review* 1985;75(2):332-37.
  18. Hiilamo H, Glantz SA. Implementation of effective cigarette health warning labels among low and middle income countries: state capacity, path-dependency and tobacco industry activity. *Soc Sci Med* 2015;124:241-5. doi: 10.1016/j.socscimed.2014.11.054
  19. World Health Organization. WHO report on the global tobacco epidemic 2015, dataset. Geneva, 2015.
  20. Yurekli A, de Beye J. Design and administer tobacco taxes. World Bank economics of tobacco toolkit ; no. 4. design and administration. Washington D.C.: World Bank, 1999.
  21. McDaniel PA, Intinarelli G, Malone RE. Tobacco industry issues management organizations: creating a global corporate network to undermine public health. *Global Health* 2008;4:2. doi: 1744-8603-4-2 [pii]
- 10.1186/1744-8603-4-2 [published Online First: 2008/01/19]

- 1  
2  
3 22. International Tobacco Documentation Centre. International fiscal guide to tobacco. World taxation,  
4 price, tariff and regulatory information. Philip Morris, 1998:2074330579-1410.  
5  
6 23. World Bank. Country and Lending Groups., 2016.  
7  
8 24. Blecher E, van Walbeek C. An Analysis of Cigarette Affordability. Paris: International Union Against  
9 Tuberculosis and Lung Disease, 2008.  
10  
11 25. Marshall MG, Cole BR. Global Report 2014. Conflict, Governance and State Fragility. : Center for  
12 Systemic Peace 2014 [Available from: <http://www.systemicpeace.org/SFI/matrix2010c.pdf>  
13 accessed 31 Jan 2014].  
14  
15 26. World Health Organization. 2014 global progress report on implementation of the WHO Framework  
16 Convention on Tobacco Control, 2014.  
17  
18 27. Crosbie E, Sebrie EM, Glantz SA. Tobacco industry success in Costa Rica: the importance of FCTC  
19 article 5.3. *Salud Publica Mex* 2012;54(1):28-38. doi: S0036-36342012000100005 [pii] [published  
20 Online First: 2012/01/31]  
21  
22 28. Crosbie E, Sosa P, Glantz SA. Costa Rica's implementation of the Framework Convention on Tobacco  
23 Control: Overcoming decades of industry dominance. *Salud Publica Mex* 2016;58(1):62-70.  
24  
25 29. Crosbie E, Sosa P, Glantz SA. Defending strong tobacco packaging and labelling regulations in  
26 Uruguay: transnational tobacco control network versus Philip Morris International. *Tob Control*  
27 2017 doi: 10.1136/tobaccocontrol-2017-053690  
28  
29 30. Crosbie E, Sosa P, Glantz SA. The importance of continued engagement during the implementation  
30 phase of tobacco control policies in a middle-income country: the case of Costa Rica. *Tob Control*  
31 2017;26(1):60-68. doi: 10.1136/tobaccocontrol-2015-052701  
32  
33 31. Bump JB, Reich MR. Political economy analysis for tobacco control in low- and middle-income  
34 countries. *Health Policy Plan* 2013;28(2):123-33. doi: czs049 [pii]  
35  
36 10.1093/heapol/czs049 [published Online First: 2012/05/16]  
37  
38 32. Leischow SJ, Ayo-Yusuf O, Backinger CL. Converging research needs across framework convention on  
39 tobacco control articles: making research relevant to global tobacco control practice and policy.  
40 *Nicotine Tob Res* 2012;15(4):761-6. doi: nts199 [pii]  
41  
42 10.1093/ntr/nts199 [published Online First: 2012/09/20]  
43  
44 33. Sanders-Jackson AN, Song AV, Hiilamo H, et al. Effect of the Framework Convention on Tobacco  
45 Control and voluntary industry health warning labels on passage of mandated cigarette warning  
46 labels from 1965 to 2012: transition probability and event history analyses. *Am J Public Health*  
47 2013;103(11):2041-7. doi: 10.2105/AJPH.2013.301324 [published Online First: 2013/09/14]  
48  
49 34. Uang R, Hiilamo H, Glantz SA. Accelerated Adoption of Smoke-Free Laws After Ratification of the  
50 World Health Organization Framework Convention on Tobacco Control. *Am J Public Health*  
51 2016;106(1):166-71. doi: 10.2105/AJPH.2015.302872  
52  
53 35. Hiilamo H, Glantz S. FCTC followed by accelerated implementation of tobacco advertising bans. *Tob*  
54 *Control* 2016 doi: 10.1136/tobaccocontrol-2016-053007  
55  
56 36. Mahoney J. Path Dependence in Historical Sociology. *Theory and Society* 2000;29:507-48.  
57  
58 37. Crosbie E, Sosa P, Glantz SA. Defending strong tobacco packaging and labelling regulations in  
59 Uruguay: transnational tobacco control network versus Philip Morris International. *Tob Control*  
2017;27(2):185-94. doi: 10.1136/tobaccocontrol-2017-053690 [published Online First:  
2017/03/25]  
60  
38. Uang R, Crosbie E, Glantz SA. Tobacco control law implementation in a middle-income country:  
Transnational tobacco control network overcoming tobacco industry opposition in Colombia.  
*Glob Public Health* 2018;13(8):1050-64. doi: 10.1080/17441692.2017.1357188 [published Online  
First: 2017/08/18]

- 1  
2  
3 39. Blecher E. Targeting the affordability of cigarettes: a new benchmark for taxation policy in low-  
4 income and-middle-income countries. *Tob Control* 2010;19(4):325-30. doi:  
5 10.1136/tc.2009.030155  
6  
7 40. Blecher E, Ross H, Leon ME. Cigarette affordability in Europe. *Tob Control* 2013;22(4):e6. doi:  
8 10.1136/tobaccocontrol-2012-050575  
9  
10 41. Gilmore AB, Fooks G, Drope J, et al. Exposing and addressing tobacco industry conduct in low-income  
11 and middle-income countries. *Lancet* 2015;385(9972):1029-43. doi: 10.1016/S0140-  
12 6736(15)60312-9  
13  
14 42. Wipfli H. The Global War on Tobacco. Mapping the World's First Public Health Treaty. Baltimore:  
15 Johns Hopkins University Press 2016.  
16  
17 43. Blecher E, Ross H, Stoklosa M. Lessons learned from cigarette tax harmonisation in the European  
18 Union. *Tob Control* 2014;23(e1):e12-4. doi: 10.1136/tobaccocontrol-2012-050728  
19  
20 44. Campaign for Tobacco-Free Kids. Tobacco tax success story: United Kingdom. Washington, 2012.  
21  
22 45. Sinha DN, Gupta PC, Kumar A, et al. The poorest of poor suffer the greatest burden from smokeless  
23 tobacco use: A study from 140 countries. *Nicotine Tob Res* 2017 doi: 10.1093/ntr/ntx276  
24  
25  
26  
27  
28  
29  
30  
31  
32  
33  
34  
35  
36  
37  
38  
39  
40  
41  
42  
43  
44  
45  
46  
47  
48  
49  
50  
51  
52  
53  
54  
55  
56  
57  
58  
59  
60

**FIGURE CAPTIONS**

Figure 1. Tobacco tax rates in 1998/1999 and 2014 as percent of retail price.

Figure 2. Shares of price of 100 cigarette packs of Gross Domestic Product per Capita in 1999 and 2014 as percent of retail price.

For peer review only



\* Country has not ratified FCTC.

Figure 1. Tobacco tax rates in 1998/1999 and 2014 as percent of retail price.

Caption : Figure 1. Tobacco tax rates in 1998/1999 and 2014 as percent of retail price.

504x377mm (300 x 300 DPI)





\* Country has not ratified FCTC.

Figure 2. Shares of price of 100 cigarette packs of Gross Domestic Product per Capita in 1999 and 2014 as percent of retail price.

Caption : Figure 2. Shares of price of 100 cigarette packs of Gross Domestic Product per Capita in 1999 and 2014 as percent of retail price.

504x313mm (300 x 300 DPI)

view only

# BMJ Open

## LIMITED IMPLEMENTATION OF THE FRAMEWORK CONVENTION ON TOBACCO CONTROL'S TOBACCO TAX PROVISION: GLOBAL COMPARISON

|                                 |                                                                                                                                                                                                                                                                                                                                                                    |
|---------------------------------|--------------------------------------------------------------------------------------------------------------------------------------------------------------------------------------------------------------------------------------------------------------------------------------------------------------------------------------------------------------------|
| Journal:                        | <i>BMJ Open</i>                                                                                                                                                                                                                                                                                                                                                    |
| Manuscript ID                   | bmjopen-2017-021340.R4                                                                                                                                                                                                                                                                                                                                             |
| Article Type:                   | Research                                                                                                                                                                                                                                                                                                                                                           |
| Date Submitted by the Author:   | 23-Aug-2018                                                                                                                                                                                                                                                                                                                                                        |
| Complete List of Authors:       | Hiilamo, Heikki; University of Helsinki, Department of Social Research, social and public policy; VID Vitenskapelige Hogskole<br>Glantz, S; University of California, San Francisco, Center for Tobacco Control Research and Education, Philip R. Lee Institute for Health Policy Studies, Helen Diller Family Comprehensive Cancer Center, Department of Medicine |
| <b>Primary Subject Heading</b>: | Smoking and tobacco                                                                                                                                                                                                                                                                                                                                                |
| Secondary Subject Heading:      | Global health                                                                                                                                                                                                                                                                                                                                                      |
| Keywords:                       | tobacco industry, tobacco taxation, FCTC                                                                                                                                                                                                                                                                                                                           |
|                                 |                                                                                                                                                                                                                                                                                                                                                                    |

SCHOLARONE™  
Manuscripts

1  
2  
3 **LIMITED IMPLEMENTATION OF THE FRAMEWORK CONVENTION ON**  
4  
5 **TOBACCO CONTROL'S TOBACCO TAX PROVISION: GLOBAL COMPARISON**  
6  
7  
8  
9  
10

11  
12 Heikki Hiilamo<sup>ab</sup>, PhD  
13

14 Stanton Glantz<sup>c</sup>, PhD  
15

16  
17 <sup>a</sup> VID Specialized University, Oslo, Norway

18 <sup>b</sup> Social and public policy, Department of Social Research, 00014 University of Helsinki,  
19 Finland, heikki.hiilamo@helsinki.fi

20 <sup>c</sup> Center for Tobacco Control Research and Education, Philip R. Lee Institute for Health Policy  
21 Studies, Helen Diller Family Comprehensive Cancer Center, Department of Medicine  
22 University of California San Francisco, San Francisco, CA 94143-1390, stanton.glantz@ucsf.edu  
23  
24  
25  
26

27 Corresponding Author:  
28 Heikki Hiilamo, Professor  
29 University of Helsinki  
30 Department of Social Research  
31 Unioninkatu 37  
32 00014 Helsingin yliopisto  
33 Finland  
34 Tel. +358403587203  
35 Fax. +358294124835  
36 [heikki.hiilamo@helsinki.fi](mailto:heikki.hiilamo@helsinki.fi)  
37  
38  
39

40 Word count 3425  
41  
42  
43  
44  
45  
46  
47  
48  
49  
50  
51  
52  
53  
54  
55  
56  
57  
58  
59  
60

## ABSTRACT

**OBJECTIVE:** To quantify changes in tobacco tax rates and cigarette affordability after countries ratified the WHO Framework Convention on Tobacco Control (FCTC) using with the World Health Organization MPOWER standards. .

**METHODS:** We used logistic regression to assess the association of FCTC ratification with adoption of at least 50% and 75% (high) of retail price tobacco tax rates for the most sold brands in countries, accounting for years since ratification and other covariates. We also compared cigarette affordability in 2014 to 1999.

**RESULTS:** By 2014, 44% of high-income countries had taxes above 75% of retail value compared to 18% in 1998/1999. In fifteen years 69 countries increased the tobacco tax rate, 33 decreased it, and one had the same tax rate. FCTC ratification was not associated with implementing high tobacco taxes. More fragile countries in terms of security, political, economic, and social development were less likely to have at least 50% and 75% tobacco tax rates in 2014 compared with 1999. The higher the cigarette prices in 1999 the less likely the countries were to have at least 75% tobacco tax rates in 2014. However, cigarettes were less affordable in 2014 than in 1999 in countries that had ratified FCTC earlier.

**CONCLUSIONS:** Despite widespread FCTC ratification, implementing higher tobacco taxes remains incomplete. Guidelines for FCTC Article 6 implementation should assign definite targets for tobacco taxes and for implementation of a tax escalator that gradually increases taxes to match rising income levels. Fragile countries are less likely to have high tobacco taxes and less affordable cigarettes. The tobacco control community should intensify efforts to help fragile countries improve performance in FCTC implementation both through strengthening their administrative and technical capacity and through supporting basic functions of government.

### STRENGTHS AND LIMITATIONS OF THIS STUDY

- We were able to assess changes in tobacco taxes and prices over 15 years in 103 countries.
- We used WHO's own standards for effective tax rates.
- The willingness and ability of states to implement effective tobacco taxes was measured through state fragility index.
- The limitation of the study is that we could not analyze how the tobacco companies respond to the tax increase.
- The baseline data came from two different data sources.

## INTRODUCTION

Raising tobacco taxes is an effective strategy to reduce tobacco use<sup>1-3</sup>. On average a 10% price increase will reduce tobacco use by 4% in high income countries and by 5% among low- and middle-income countries.<sup>4</sup> Article 6 of the World Health Organization (WHO) Framework Convention on Tobacco Control<sup>5</sup> (FCTC) commits parties to implement “tax policies and, where appropriate, price policies, on tobacco products so as to contribute to the health objectives aimed at reducing tobacco consumption.”<sup>5</sup> Article 6 implementation Guidelines<sup>6</sup> recommend tax policies which take into account tobacco products’ price elasticity (the rate by which tobacco consumption decreases as result of price increases) and income elasticity (the sensitivity of tobacco consumption to income changes) to make tobacco products less affordable over time, but does not set specific targets for taxes or prices.

Tobacco industry tactics to block tax increases have a major influence on tax rates and industry responses to tax increases have a major effect on cigarette prices. Tobacco taxes are politically difficult to raise because tobacco companies fight tax increases<sup>2</sup> by commissioning research claiming economic benefits of tobacco, creating alliances,<sup>7</sup> including with progressive organizations,<sup>8</sup> lobbying ministries of finance with poor knowledge of public health and FCTC requirements,<sup>9</sup> and arguing tax increases drive illicit trade<sup>2</sup> and hurt disadvantaged groups.<sup>8 10 11</sup> They also learned how to cope with tax increases and sometimes actually benefit from them by overshifting taxes on premium brands to increase profits while downshifting taxes on ultra-low-price brands to cushion the effects of tax increases on total consumption.<sup>12-15</sup> Even a series of substantial tax increases, such as in Australia<sup>16</sup>, may not increase the tax rate if the industry keeps overshifting tax increases to prices. In this sense, tax rates can be a relatively poor indicator of cigarette prices.

1  
2  
3 WHO established the MPOWER measures in 2008 to scale up key FCTC demand  
4  
5 reduction measures including tobacco taxes. MPOWER emphasizes that “increasing the price of  
6  
7 tobacco through higher taxes is the single most effective way to encourage tobacco users to quit  
8  
9 and prevent children from starting to smoke.”<sup>2</sup> A key finding of the 2015 MPOWER report was  
10  
11 that taxes were the least implemented MPOWER measure with only 10% of the world’s  
12  
13 population (living in 33 countries) covered by taxes of at least 75% of retail price<sup>2</sup>. This paper  
14  
15 assesses the association of FCTC ratification with implementing tobacco taxes by analyzing  
16  
17 changes in tax rate using the MPOWER standard and cigarette affordability. In addition, we  
18  
19 assess the role of state capacity and previous tax and price levels<sup>17 18</sup> on taxes in 2014.  
20  
21  
22  
23

## 24 **METHODS**

### 25 **Data**

26  
27 Data on the tobacco tax rate, including specific excise, ad valorem excise, import duties,  
28  
29 value added tax, and other taxes were obtained from the World Health Organization Report on  
30  
31 the Global Tobacco Epidemic 2015 public dataset for 2014.<sup>19</sup> This dataset includes information  
32  
33 collected by WHO in-country experts as of 31 December 2014 on the prices of the most-sold  
34  
35 brand of cigarettes (both in local currency and in US dollars) and cigarette taxes. Information on  
36  
37 the taxation of cigarettes (and when possible, most commonly used tobacco products) was  
38  
39 collected from ministries of finance. (Because WHO did not report tax data for Syria in 2014 we  
40  
41 used the data from 2012 for 2014.) In countries where different taxes applied to cigarettes based  
42  
43 on length, quantity produced, or type (e.g., filter vs. non-filter), the rate that applied to the most  
44  
45 popular brand was used to calculate the tax rate.  
46  
47  
48  
49  
50

51 We obtained baseline pre-FCTC taxes using the 1999 World Bank (WB) survey of 64  
52  
53 countries that reported the share of cigarette taxes (including value added tax, VAT) as a  
54  
55  
56  
57

percentage of the retail price of a pack of cigarettes<sup>20</sup> supplemented by the tobacco industry's International Tobacco Documentation Centre's<sup>21</sup> 1998 *International Fiscal Guide to Tobacco* that mapped international taxation, price and tariff policies.<sup>22</sup>

Tobacco tax rate is the portion of the price represented by all taxes (including VAT for the most-sold brand of cigarettes, is our outcome variable. We studied two outcome variables derived from MPOWER standards in the *WHO Report on the Global Tobacco Epidemic 2015: Raising Taxes on Tobacco*: (1) taxes that totaled at least 75% of retail price, the highest MPOWER standard<sup>2</sup>, and (2) taxes that totaled at least 50% of retail price, the second highest standard.<sup>2</sup> FCTC Article 6 does not set targets on tobacco prices. The expectation in FCTC and MPOWER is that if the manufacturers increase wholesale prices so that the overall tax rate drops below 75% or 50%, the government would increase taxes so that the tax share would go above 75% or 50%.

To analyze the income level of the countries we used World Bank (WB) 2016 gross national income (GNI) categories:<sup>23</sup> low-income countries were defined as those with a GNI per capita of \$1,045 or less in 2014; middle-income economies, \$1,046 to \$12,735; high income, \$12,736 or more. Lower-middle-income and upper-middle-income economies were separated at a GNI per capita of \$4,125. Since our sample included only eight low-income countries, after cross tabulation analysis we combined low income and lower middle-income categories in the regression analysis. We used information on cigarette prices expressed in nominal US dollars in 1998/1999.

We analyzed the association of FCTC with affordability of cigarettes by using the fraction of per capita gross domestic product (GDP) that would be needed to buy 100 packs of the most sold cigarette brand. This method is a more comprehensive and representative measure



1  
2  
3 of income across countries in different income levels than, for example surveys of wages.<sup>24</sup>We  
4 used price data described above and World Bank data for GDP per capita for 1999 and 2014.<sup>23</sup> In  
5  
6 addition, we used the growth of GDP per capita from 1999 to 2014<sup>23</sup> ( $[(2014 \text{ GDP} - 1999$   
7  
8 GDP]/1999 GDP, GDP expressed in 2014 US dollars) as an independent variable on the  
9  
10 assumption that cigarettes would be more affordable in 2014 among those countries where the  
11  
12 rise in income level was the fastest. We assume that changes in GDP over the 16-year period  
13  
14 reflect changes in disposable income.  
15  
16  
17

### 18 19 **Other Variables**

20  
21 To study the willingness and ability of states to implement public policies we used  
22  
23 Marshall and Cole's<sup>25</sup> state fragility index. This index scores all countries with population above  
24  
25 500,000 in four performance dimensions: security, political, economic, and social. Previous  
26  
27 literature has shown that state fragility matters for implementing effective cigarette health  
28  
29 warnings.<sup>17 18</sup> The index gives higher scores for more fragile countries (Sudan scored 23 while  
30  
31 the 15 most stable countries scored 0) but does not place countries into different categories. We  
32  
33 averaged scores for 2007, 2010 and in 2013 to test whether more fragile countries were less  
34  
35 likely to have high tobacco taxes in 2014. By more fragile countries we refer to those countries  
36  
37 which score higher on Marshall and Cole's state fragility index.  
38  
39  
40  
41

42 We studied the role of previous tax and price levels on tax rate in 2014 with two  
43  
44 variables, tobacco tax rates in 1998/1999 and price of most sold cigarette packs in US dollars in  
45  
46 1998/1999. We tested whether countries with higher cigarette taxes and higher price cigarettes in  
47  
48 1998/1999 were more likely to have high tax rates in 2014.  
49  
50

### 51 **Statistical Analysis**

1  
2  
3 Logistic regression was used in separate analyses with 75% and 50% tax rates in 2014 as  
4 the outcome variable. We studied the effect of FCTC by calculating the number of years since  
5 FCTC ratification as of 2014. We set years since ratification to 0 for countries that ratified the  
6 FCTC in 2014 (El Salvador, Ethiopia and Zimbabwe), had signed but not ratified the FCTC as of  
7 the end of 2014 (Argentina, Cuba, Haiti, Morocco, Mozambique, Switzerland and the United  
8 States), or had not signed or become parties to the FCTC by January 2016 (Andorra, Dominican  
9 Republic, Eritrea, Indonesia, Liechtenstein, Malawi, Monaco, Somalia). Countries that already  
10 had a tax rate of 50% (final sample used N=44) or 75% (N=88) in 1998/1999 were excluded  
11 from the analysis.  
12  
13  
14  
15  
16  
17  
18  
19  
20  
21  
22  
23

24 Our analysis has 80% statistical power (with  $\alpha=.05$ ) to detect an OR by a factor of 1.25  
25 (or 0.80) associated with FCTC ratification.  
26  
27

28 We also used logistic regression to analyze the effect of the FCTC on cigarette  
29 affordability by assigning a value of 1 for those countries where cigarettes were less affordable  
30 in 2014 than in 1999 and 0 where cigarettes were more affordable. We tested interaction between  
31 state capacity and FCTC ratification to see if more fragile countries were slower in ratifying  
32 FCTC. We also ran a sensitivity analysis to test if cigarettes are less affordable in countries with  
33 extensive tobacco control measures.  
34  
35  
36  
37  
38  
39  
40  
41

42 We used R functions `glm` and `minEffect.VSMc.logistic` from `powerMediation` for the  
43 analysis.  
44  
45

#### 46 **Patient and Public Involvement**

47 Patients or public were not involved in the study.  
48  
49

#### 50 **RESULTS**

Tobacco tax rates have not uniformly increased from 1998/1999 to 2014 as shown in Figure 1 where the countries are ranked by their tax rate in 1998/1999. The average tax rate increased from 53% of the price of the most sold cigarette brands in 1998/1999 to 58% in 2014. In those fifteen years 69 countries increased the tobacco tax rate, 33 decreased it (30 FCTC ratifying countries), and one country (Austria) had the same tax rate.

In 1998/1999 only 8 (18%) of high-income, 2 (8%; Brazil and Costa Rica) upper-middle-income, one lower-middle-income country (4%, Sri Lanka), and none of the low-income countries had a tax above 75% of the retail price (Table 1). By 2014, 44% of high-income countries had taxes above 75% of retail value. The progress was slow among higher- and lower-middle-income countries with just one additional country complying in each income category and no low-income country.

In 1998/1999 37 (82%) of high-income countries had taxes that comprised above 50% of retail price, while only 11 (46%) of higher-middle-income countries, 9 (35%) of lower-middle-income countries, and two (23%) low-income country had that tax rate. By 2014 39 (87%) of high-income countries had taxes above 50% of retail price, as did 16 (67%) of upper-middle - income countries, 13 (50%) of lower-middle-income countries, and 1 (13%) low-income country (Zimbabwe).

|                            | Tobacco tax > 75% (high) |    |                       | Tobacco tax > 50% |    |                       |
|----------------------------|--------------------------|----|-----------------------|-------------------|----|-----------------------|
|                            | Yes                      | No | Fraction of countries | Yes               | No | Fraction of countries |
| <b>High-income</b>         |                          |    |                       |                   |    |                       |
| 1998/1999                  | 8                        | 37 | 18%                   | 37                | 8  | 82%                   |
| 2014                       | 20                       | 25 | 44%                   | 39                | 7  | 87%                   |
| <b>Upper-middle-income</b> |                          |    |                       |                   |    |                       |

|                                                                                                                                                                                                                                                                                                                                                                                                                                                                                                                                                                                                                                                                                                                                                                                                                                                                                                                                                                  |   |    |     |    |    |     |
|------------------------------------------------------------------------------------------------------------------------------------------------------------------------------------------------------------------------------------------------------------------------------------------------------------------------------------------------------------------------------------------------------------------------------------------------------------------------------------------------------------------------------------------------------------------------------------------------------------------------------------------------------------------------------------------------------------------------------------------------------------------------------------------------------------------------------------------------------------------------------------------------------------------------------------------------------------------|---|----|-----|----|----|-----|
| 1998/1999                                                                                                                                                                                                                                                                                                                                                                                                                                                                                                                                                                                                                                                                                                                                                                                                                                                                                                                                                        | 2 | 22 | 8%  | 11 | 13 | 46% |
| 2014                                                                                                                                                                                                                                                                                                                                                                                                                                                                                                                                                                                                                                                                                                                                                                                                                                                                                                                                                             | 3 | 21 | 13% | 16 | 8  | 67% |
| Lower-middle-income                                                                                                                                                                                                                                                                                                                                                                                                                                                                                                                                                                                                                                                                                                                                                                                                                                                                                                                                              |   |    |     |    |    |     |
| 1998/1999                                                                                                                                                                                                                                                                                                                                                                                                                                                                                                                                                                                                                                                                                                                                                                                                                                                                                                                                                        | 1 | 25 | 4%  | 9  | 17 | 35% |
| 2014                                                                                                                                                                                                                                                                                                                                                                                                                                                                                                                                                                                                                                                                                                                                                                                                                                                                                                                                                             | 1 | 25 | 4%  | 13 | 13 | 50% |
| Low-income                                                                                                                                                                                                                                                                                                                                                                                                                                                                                                                                                                                                                                                                                                                                                                                                                                                                                                                                                       |   |    |     |    |    |     |
| 1998/1999                                                                                                                                                                                                                                                                                                                                                                                                                                                                                                                                                                                                                                                                                                                                                                                                                                                                                                                                                        | 0 | 8  | 0%  | 2  | 6  | 23% |
| 2014                                                                                                                                                                                                                                                                                                                                                                                                                                                                                                                                                                                                                                                                                                                                                                                                                                                                                                                                                             | 0 | 8  | 0%  | 1  | 7  | 13% |
| <p>45 countries changed WB status during the observation period. The following countries changed from low-income countries to lower-middle income countries: Bangladesh, Cambodia, Cameroon, Côte d'Ivoire, Ghana, Honduras, India, Kenya, Lesotho, Nicaragua, Nigeria, Pakistan and Vietnam. The following countries changed from lower-middle income countries to upper-middle income countries: Algeria, Belarus, Belize, Bulgaria, Columbia, Costa Rica, Dominican Republic, Ecuador, Fiji, Guyana, Jamaica, Kazakhstan, Macedonia, Namibia, Panama, Romania, Russia, Suriname and Thailand. The following countries changed from upper-middle-income countries to high income countries: Barbados, Chile, Czech Republic, Estonia, Hungary, Malta, Poland, Republic of Korea, Slovakia, Trinidad and Tobago and Uruguay. Latvia and Lithuania changed from lower-income countries to high-income countries. No country changed to a lower income group.</p> |   |    |     |    |    |     |

The logistic regression showed that time since FCTC ratification was not associated with implementing high tobacco taxes (Table 2). More fragile countries were less likely to have 75% and 50% tobacco tax rates in 2014. Countries with higher cigarette prices in 1998/1999 were more likely to have 75% tax rates in 2014. Countries with higher tax rates in 1998/1999 were more likely than countries with lower tax rates in 1998/1999 to have 75% tobacco tax rates in 2014. To test overall effects we calculated a linear regression model for all countries in our sample with tax rates in 2014 as the dependent variable and FCTC ratification, tax rate in 1999, price in 1999 and state capacity as independent variables ( $R^2 = 0.48$ ). FCTC ratification and price were not statistically significant ( $P > 0.7$  and  $P > 0.3$  respectively). The coefficients for tax rate in 1999 were 0.40 ( $p < 0.001$ ) and for state capacity -1.58 ( $p < 0.001$ ). The variance inflation

factors in the first model ranged from 1.08 to 1.68 and in the second model from 1.04 to 1.12, well below the threshold for multicollinearity concern.

As a sensitivity analysis, we also ran OLS regression with actual tax rate in 2014 as the dependent variable for the whole sample. We used the same independent variables as in logit analysis. Tax rate in 1999 was positively associated with tax rate in 2014 (coeff. 0.41,  $p=0.0003$ ) and lack of state capacity was negatively associated with tax in 2014 (coeff. -1.52,  $p=0.00001$ ). The results were essentially the same as the logistic regression analysis.

**Table 2. Odds of passing high standard tobacco taxes by 2014 (among non-compliant countries in 1998/1999)**

| Variable                           | Tobacco tax $\geq$ 75% of retail price (high) |             | Tobacco tax $\geq$ 50% of retail price |             |
|------------------------------------|-----------------------------------------------|-------------|----------------------------------------|-------------|
|                                    | Odds ratio                                    | 95% CI      | Odds ratio                             | 95% CI      |
| Years since FCTC ratification      | 1.04                                          | (0.81-1.43) | 0.94                                   | (0.76-1.15) |
| Tax rate in 1998/1999              | 1.07*                                         | (1.00-1.14) | 1.01                                   | (0.94-1.08) |
| Price in 1998/1999                 | 0.31*                                         | (0.10-0.73) | 0.78                                   | (0.22-2.78) |
| State capacity                     | 0.67**                                        | (0.49-0.83) | 0.86*                                  | (0.74-0.99) |
| Number of countries (observations) | 88                                            |             | 62                                     |             |

\*  $P \leq 0.05$ , \*\*  $P \leq 0.01$ , Numbers in parentheses are 95% confidence intervals.

There were large differences in affordability of cigarettes across countries in both 1999 and 2014 (Figure 2). At the lower end of the range, in 2014 less than one percent of per capita GDP was required to buy 100 packs of the most sold cigarette brands in Luxembourg, while at the upper end in Tanzania the corresponding figure was 24.6% (28.9% in 1999). Cigarettes become less affordable between 1999 and 2014 in 51 countries and more affordable in 40 countries. Cigarettes had become less affordable in 73% of high-income countries (27/37), 61% of upper-middle-income countries (14/23) and 31% of lower-middle- and low-income countries

(10/32). Ratifying the FCTC earlier was associated with cigarettes becoming less affordable in 2014 implying perhaps that countries with affordable cigarette prices in 1999 were quicker to ratify the FCTC and implement its tax provision (Table 3). Cigarettes became more affordable in countries with high rates of per capita GDP growth between 1999 and 2014. Lack of state capacity was associated with lower odds for having less affordable cigarettes. The variance inflation factors ranged from 1.04 to 1.10, indicating no multicollinearity problems.

As a sensitivity analysis, we also ran OLS regression with cigarette affordability in 2014 as the dependent variable for the whole sample. We used the same independent variables as in logit analysis. The direction of association was again similar as in logit analysis. Ratifying the FCTC earlier was positively associated with cigarettes becoming less affordable in 2014 (coeff.0.04, p=0.03), while GDP growth (coeff.-0.10, p=0.001) and lack of state capacity (coeff.-0.02, p=0.001) were negatively associated with having less affordable cigarettes.

| <b>Table 3. Odds of cigarettes being less affordable by 2014</b>                          |            |             |
|-------------------------------------------------------------------------------------------|------------|-------------|
| Variable                                                                                  | Odds ratio | 95% CI      |
| Years since FCTC ratification                                                             | 1.23*      | (1.02-1.50) |
| GDP per capita growth from 1999 to 2014                                                   | 0.48**     | (0.28-0.75) |
| State capacity                                                                            | 0.90*      | (0.82-0.99) |
| Number of countries (observations)                                                        | 91         |             |
| * $P \leq 0.05$ , ** $P \leq 0.01$ , Numbers in parentheses are 95% confidence intervals. |            |             |

## DISCUSSION

Our results confirm earlier findings showing slow progress in meeting the 75% or 50% tobacco tax rate targets among low- and middle-income countries.<sup>2 26</sup> Likewise, our results support concerns<sup>2</sup> that FCTC Article 6 has not, in general, led countries to implement high tobacco taxes. Lack of success can be partly attributed to state fragility. More fragile countries in

1  
2  
3 terms of security, political, economic, and social development may not have administrative and  
4 technical capacity to implement high tobacco taxes.<sup>27-30</sup> We did not detect an interaction between  
5 state capacity and time since FCTC ratification, which indicates that weak state capacity as such  
6 may not prevent countries from ratifying FCTC. Promoting the FCTC should include  
7 strengthening of the basic functions of government.<sup>31 32</sup>

14 Countries with higher tax rates in 1998/1999 were more likely to have at least a 75% tax  
15 rate in 2014. Increasing tobacco taxes requires determined action from governments. Countries  
16 that had higher tobacco taxes before the FCTC continued to do so also after ratifying it. The  
17 results indicate a path-dependency in tobacco taxation policies.<sup>33-35</sup> The passing of tobacco tax  
18 policies is a contingent event that sets into motion institutional patterns that have deterministic  
19 properties.<sup>36</sup> The result emphasizes the importance of intensifying efforts to implement high  
20 tobacco taxes especially in countries with originally low tax rates.

31 Surprisingly, lower, not higher, cigarette prices in 1998/1999 were associated with 75%  
32 tobacco tax rates in 2014 (Table 2). Countries with low cigarette prices in 1998/1999 may have  
33 reached the target with regular inflationary adjustments. This association may also reflect a  
34 possible ceiling effect where governments are reluctant to increase tobacco taxes if the cigarettes  
35 are already relatively expensive. This could also result from tobacco industry lobbying.<sup>2 7-9</sup>  
36 FCTC Article 6 and its implementation Guidelines expressly emphasize health goals in  
37 determining tobacco taxation. The health groups play an important role in creating awareness  
38 and building capacity for FCTC implementation.<sup>37 38 30</sup> It is also possible that that it is easier for  
39 a country to reach the 75% tax rate if the price was low before the tax increase.

51 Consistent with earlier studies on cigarette affordability, cigarettes were more affordable  
52 in 2014 than in 1999 despite tax increases.<sup>2 24 39 40</sup> Our paper includes data collected well after  
53

1  
2  
3 2010, so we were able base our analysis on a longer time horizon than earlier analyses and  
4  
5 thereby confirm well-established trend in cigarette affordability. Countries that ratified FCTC  
6  
7 earlier on average had less affordable cigarettes in 2014. The results seem to contradict the  
8  
9 earlier finding of the non-significant association of FCTC ratification with having high cigarette  
10  
11 taxes. It may well be that the FCTC prompted countries to increase tobacco taxes but not enough  
12  
13 to obtain 50% or 75% tax rates. It is also possible that countries with already high tax rates were  
14  
15 more likely to ratify FCTC earlier. If we include 199 tobacco tax rates in the model, FCTC  
16  
17 ratification remains statistically significant.  
18  
19

20  
21 There are many different ways that one could define an “effective” tax rate, including  
22  
23 70% tax rate as specified in the WHO Technical Manual on Tobacco Tax Administration (1).  
24  
25 The MPOWER set a target of 75% of price. Because this is a paper on the effect that the FCTC  
26  
27 had on tax policy, we used the WHO’s own standard of success as defined in MPOWER. The  
28  
29 MPOWER measures for effective tax rates are arbitrary and different measures could be also  
30  
31 used.  
32  
33  
34

35  
36 Our results emphasize the role of economic development in preventing cigarettes from  
37  
38 becoming less affordable. If incomes rise quickly, cigarettes become more affordable even if  
39  
40 taxes are kept constant.<sup>24</sup> This development is reflected in our result where rapid per capita  
41  
42 GDP growth between 1999 and 2014 was associated with more affordable cigarettes in 2014.  
43  
44 Among those 14 countries where the per capita GDP increased more than 300% in 15 years,  
45  
46 cigarettes were less affordable in just three countries. In fact, the weakness of set tobacco tax rate  
47  
48 targets, for example 50% of retail price, is that they do not take into account the effect of rising  
49  
50 incomes or industry pricing behavior. Keeping other factors constant the demand for cigarettes  
51  
52 generally increases with the average level of income, especially in developing countries.<sup>24</sup>  
53  
54  
55  
56  
57



1  
2  
3 Lack of state capacity was associated with both lower odds for having high tobacco taxes  
4 and less affordable cigarettes. Tobacco taxes are low and cigarettes are affordable in more fragile  
5 countries, while taxes are high and cigarettes less affordable in more stable countries. As of  
6  
7  
8  
9  
10  
11  
12  
13  
14  
15  
16  
17  
18  
19  
20  
21  
22  
23  
24  
25  
26  
27  
28  
29  
30  
31  
32  
33  
34  
35  
36  
37  
38  
39  
40  
41  
42  
43  
44  
45  
46  
47  
48  
49  
50  
51  
52  
53  
54  
55  
56  
57  
58  
59  
60

Lack of state capacity was associated with both lower odds for having high tobacco taxes and less affordable cigarettes. Tobacco taxes are low and cigarettes are affordable in more fragile countries, while taxes are high and cigarettes less affordable in more stable countries. As of 2018, the multinational tobacco companies were targeting countries in Asia and Africa with young populations and relatively low smoking prevalence, especially among women.<sup>41</sup>

The tax provisions in the FCTC do not include specific tax targets.<sup>5</sup> The unwillingness of FCTC parties to commit to minimum tax levels during FCTC negotiations is reflected in the lack of subsequent action.<sup>42</sup> FCTC Guidelines for Article 6 implementation recommend that Parties should take into account “both price elasticity and income elasticity of demand, as well as inflation and changes in household income, to make tobacco products less affordable over time in order to reduce consumption and prevalence.”<sup>5</sup> Our results demonstrate that current policies for implementing tobacco taxes fail to meet this recommendation.

In our sample cigarettes became more affordable from 1999 to 2014. Taking the FCTC Guideline recommendation seriously would entail the Conference of the FCTC Parties assigning definite targets not only for tobacco tax rates but also for measures that prevent tobacco products from becoming more affordable.

The effect of cigarettes becoming more affordable with rapid income rises can be prevented by adopting adequate policies.<sup>39 40 43</sup> One example is a tax escalator which is adjusted to income growth or an equivalent variable that accounts for increases in consumer purchasing power.<sup>2</sup> Such a tax escalator is already in place in the UK.<sup>44</sup> With automatically increasing tobacco taxes by the increase in purchasing power the tobacco companies would increase prices, which would prevent tobacco products not becoming more affordable. To allow this process to take place tobacco taxes rates could, at least temporarily, rise even above the 75% standard.

1  
2  
3 Another option is to set a tax for each brand guaranteeing a 75% tax for every product. Doing so  
4  
5 would make it more difficult for tobacco companies to downshift tax increases.  
6

## 7 8 **Limitations**

9  
10 Assessing the change in tax as a share of price over time can be complicated.<sup>19</sup>  
11  
12 Determination of tax rates as a proportion of total cigarette retail price is dependent on changes  
13  
14 in tax rates but also on changes in wholesale prices. Consequently, despite an increase in the tax  
15  
16 on cigarettes, the share of excise and total taxes in the retail price could remain the same or  
17  
18 shrink depending on how the tobacco companies respond to the tax increase. Similarly, the share  
19  
20 of taxes in the final retail price might increase, even if there is no change in the tax levied on a  
21  
22 pack of cigarettes. The FCTC might have prompted countries to increase tobacco taxes but not  
23  
24 enough, given that the FCTC did not specify 50/75% tax rates as a requirement.  
25  
26

27  
28 The Article 6 Guidelines were adopted in 2014, nine years after the FCTC entered force  
29  
30 and may have delayed Parties' attention to implementing tax increases. Other analyses of health  
31  
32 warning labels<sup>18 33</sup> (Article 11), smokefree policies<sup>34</sup> (Article 8) and advertising bans<sup>35</sup> (Article  
33  
34 13), however, demonstrated an effect of FCTC ratification without considering the delay in  
35  
36 adoption of the implementing guidelines for these articles.  
37  
38

39  
40 To establish a baseline before FCTC we used tobacco tax and price data from two  
41  
42 different sources, World Bank survey from 1999<sup>20</sup> and the International Tobacco Documentation  
43  
44 Centre's<sup>21</sup> 1998 *International Fiscal Guide to Tobacco*. Both data sources include information  
45  
46 on retail price of the most-sold cigarette brand. The high correlation (0.947) for overlapping  
47  
48 price information indicates the data was collected in a substantially uniform manner. The  
49  
50 correlation for tax data was lower, 0.676). This lower correlation could indicate a measurement  
51  
52 error in the datasets or it could indicate that tobacco taxes increased from 1998 to 1999 more  
53  
54  
55  
56  
57  
58  
59  
60

1  
2  
3 dramatically than cigarette prices. Given the more reliable international standing we deemed the  
4 World Bank survey more reliable than the *International Fiscal Guide to Tobacco* produced by  
5 the tobacco industry. We focused on the price and tax for the most-sold cigarette brand on all  
6 data sources including WHO data for 2014,<sup>19</sup> but were unable to confirm that definitions  
7 remained stable over time. The most-sold cigarette may not fully describe the effect of tobacco  
8 taxation to tobacco consumption. We did not analyze the tax structure. Our outcome variable, the  
9 share of all tobacco taxes of the most sold brand, does not fully capture the role of taxes in  
10 reducing demand for tobacco. Earlier research has shown the tobacco industry may  
11 simultaneously absorb the tax increases on its cheapest brands while over-shifting taxes on  
12 premium brands.<sup>12</sup> The higher the level of the excise and other taxes the less room for tobacco  
13 industry price differentiation strategies. We were not able to analyze how countries' tax policies  
14 have accounted for country-specific price and income elasticities.

15  
16  
17 In this study we were not able to assess the causal effects. Besides the variables used in  
18 this study other factors such as economic cycles, political leadership and tobacco control activity  
19 outside of FCTC may have affected the outcome variables.

20  
21  
22 Our analysis focused only on cigarettes ignoring other categories of tobacco products,  
23 some of which (for example bidi) are more prevalent in more fragile countries such as  
24 Bangladesh and India<sup>45</sup>. Since we had data only from two time points we were not able to assess  
25 trends in tax, price and affordability in prior periods.

## 26 **Conclusions**

27  
28  
29 In contrast to advertising restrictions,<sup>33 35</sup> health warning labels,<sup>33</sup> and smokefree  
30 environments,<sup>34</sup> FCTC ratification has not been systematically followed regarding higher  
31 tobacco taxation. FCTC Article 6 does not stipulate specific tax rates. MPOWER tax rate targets

1  
2  
3 were not introduced before 2008. The more specific FCTC Articles 8, 11 and 13 discuss smoke  
4 free environments, health warnings and advertising bans that fall into domain of health  
5 government, while Article 6 concerns financial policy, which falls under finance ministries.  
6  
7  
8  
9  
10 There need to be further efforts to increase financial ministries' knowledge of and responsibility  
11 to implement Article 6. Fragile countries are less likely to have high tobacco taxes. Rapid rise in  
12 incomes undermines the effectiveness of tobacco taxes. Guidelines for FCTC Article 6  
13 implementation should assign definite targets for tobacco taxes and for the implementation of a  
14 tax escalator that gradually increases taxes to match the rising income levels. The tobacco  
15 control community should collaborate with other parts of civil society to intensify efforts to help  
16 more fragile countries to improve performance in FCTC implementation both through  
17 strengthening their administrative and technical capacity and through supporting the basic  
18 functions of government. The FCTC Conference of the Parties should assign definite targets not  
19 only for tobacco tax rates but also for measures to prevent tobacco products from becoming more  
20 affordable.  
21  
22  
23  
24  
25  
26  
27  
28  
29  
30  
31  
32  
33  
34

## 35 **FUNDING**

36  
37 This work was supported by National Cancer Institute grant CA-087472. The funding  
38 agency played no role in the conduct of the research or preparation of the manuscript.  
39  
40  
41

## 42 **COMPETING INTERESTS**

43  
44 There are no competing interests.  
45  
46

## 47 **CONTRIBUTORSHIP**

48  
49 HH developed the idea for this study and carried out the data collection. HH and SG  
50 carried out the data analysis and wrote and revised the manuscript.  
51  
52  
53

## 54 **DATA SHARING STATEMENT**

1  
2  
3  
4  
5  
6  
7  
8  
9  
10  
11  
12  
13  
14  
15  
16  
17  
18  
19  
20  
21  
22  
23  
24  
25  
26  
27  
28  
29  
30  
31  
32  
33  
34  
35  
36  
37  
38  
39  
40  
41  
42  
43  
44  
45  
46  
47  
48  
49  
50  
51  
52  
53  
54  
55  
56  
57  
58  
59  
60

No data is shared since we are using data which is already made public.

For peer review only

## REFERENCES

1. World Health Organization. WHO technical manual on tobacco tax administration. Geneva, 2010.
  2. World Health Organization. WHO Report on the Global Tobacco Epidemic 2015: Raising taxes on tobacco. Geneva: World Health Organization, 2015.
  3. Jha P, Chaloupka FJ. The economics of global tobacco control. *BMJ* 2000;321(7257):358-61.
  4. International Agency for Research on Cancer. IARC handbooks of cancer prevention: tobacco control. Volume 14: effectiveness of tax and price policies for tobacco control Lyon, France: IARC; 2011 [
  5. World Health Organization. Framework Convention on Tobacco Control. Geneva2003.
  6. FCTC/COP/6/7. Guidelines for implementation of Article 6 of the WHO FCTC2014.
  7. Campbell RB, Balbach ED. Cigarette Excise Taxes in Context: Cautionary Lessons from the U.S. Experience. *Int J Health Serv* 2015;45(3):564-77. doi: 10.1177/0020731415584553
  8. Campbell RB, Balbach ED. Building alliances in unlikely places: progressive allies and the Tobacco Institute's coalition strategy on cigarette excise taxes. *Am J Public Health* 2009;99(7):1188-96. doi: 10.2105/AJPH.2008.143131
  9. Smith KE, Savell E, Gilmore AB. What is known about tobacco industry efforts to influence tobacco tax? A systematic review of empirical studies. *Tob Control* 2013;22(2):144-53. doi: 10.1136/tobaccocontrol-2011-050098
  10. Campbell R, Balbach ED. Mobilising public opinion for the tobacco industry: the Consumer Tax Alliance and excise taxes. *Tob Control* 2008;17(5):351-6. doi: 10.1136/tc.2008.025338
  11. Koch SF. Quasi-experimental evidence on tobacco tax regressivity. *Soc Sci Med* 2018;196:19-28. doi: 10.1016/j.socscimed.2017.11.004
  12. Gilmore AB, Tavakoly B, Taylor G, et al. Understanding tobacco industry pricing strategy and whether it undermines tobacco tax policy: the example of the UK cigarette market. *Addiction* 2013;108(7):1317-26. doi: 10.1111/add.12159
  13. Chaloupka FJ, Cummings KM, Morley CP, et al. Tax, price and cigarette smoking: evidence from the tobacco documents and implications for tobacco company marketing strategies. *Tob Control* 2002;11 Suppl 1:162-72.
  14. Brock B, Choi K, Boyle RG, et al. Tobacco product prices before and after a statewide tobacco tax increase. *Tob Control* 2016;25(2):166-73. doi: 10.1136/tobaccocontrol-2014-052018
  15. Alamar B, Mahmoud L, Glantz SA. Cigarette Smuggling in California: Fact and Fiction. Tobacco Control Policy Making: United States. San Francisco: Center for Tobacco Control Research and Education, UC San Francisco, 2003.
  16. Hirono KT, Smith KE. Australia's \$40 per pack cigarette tax plans: the need to consider equity. *Tob Control* 2017 doi: 10.1136/tobaccocontrol-2016-053608
  17. David PA. Clio and the Economics of QWERTY. *The American Economic Review* 1985;75(2):332-37.
  18. Hiilamo H, Glantz SA. Implementation of effective cigarette health warning labels among low and middle income countries: state capacity, path-dependency and tobacco industry activity. *Soc Sci Med* 2015;124:241-5. doi: 10.1016/j.socscimed.2014.11.054
  19. World Health Organization. WHO report on the global tobacco epidemic 2015, dataset. Geneva, 2015.
  20. Yurekli A, de Beye J. Design and administer tobacco taxes. World Bank economics of tobacco toolkit ; no. 4. design and administration. Washington D.C.: World Bank, 1999.
  21. McDaniel PA, Intinarelli G, Malone RE. Tobacco industry issues management organizations: creating a global corporate network to undermine public health. *Global Health* 2008;4:2. doi: 1744-8603-4-2 [pii]
- 10.1186/1744-8603-4-2 [published Online First: 2008/01/19]

22. International Tobacco Documentation Centre. International fiscal guide to tobacco. World taxation, price, tariff and regulatory information. Philip Morris, 1998:2074330579-1410.
23. World Bank. Country and Lending Groups., 2016.
24. Blecher E, van Walbeek C. An Analysis of Cigarette Affordability. Paris: International Union Against Tuberculosis and Lung Disease, 2008.
25. Marshall MG, Cole BR. Global Report 2014. Conflict, Governance and State Fragility. : Center for Systemic Peace 2014 [Available from: <http://www.systemicpeace.org/SFI/matrix2010c.pdf> accessed 31 Jan 2014.
26. World Health Organization. 2014 global progress report on implementation of the WHO Framework Convention on Tobacco Control, 2014.
27. Crosbie E, Sebrie EM, Glantz SA. Tobacco industry success in Costa Rica: the importance of FCTC article 5.3. *Salud Publica Mex* 2012;54(1):28-38. doi: S0036-36342012000100005 [pii] [published Online First: 2012/01/31]
28. Crosbie E, Sosa P, Glantz SA. Costa Rica's implementation of the Framework Convention on Tobacco Control: Overcoming decades of industry dominance. *Salud Publica Mex* 2016;58(1):62-70.
29. Crosbie E, Sosa P, Glantz SA. Defending strong tobacco packaging and labelling regulations in Uruguay: transnational tobacco control network versus Philip Morris International. *Tob Control* 2017 doi: 10.1136/tobaccocontrol-2017-053690
30. Crosbie E, Sosa P, Glantz SA. The importance of continued engagement during the implementation phase of tobacco control policies in a middle-income country: the case of Costa Rica. *Tob Control* 2017;26(1):60-68. doi: 10.1136/tobaccocontrol-2015-052701
31. Bump JB, Reich MR. Political economy analysis for tobacco control in low- and middle-income countries. *Health Policy Plan* 2013;28(2):123-33. doi: czs049 [pii] 10.1093/heapol/czs049 [published Online First: 2012/05/16]
32. Leischow SJ, Ayo-Yusuf O, Backinger CL. Converging research needs across framework convention on tobacco control articles: making research relevant to global tobacco control practice and policy. *Nicotine Tob Res* 2012;15(4):761-6. doi: nts199 [pii] 10.1093/ntr/nts199 [published Online First: 2012/09/20]
33. Sanders-Jackson AN, Song AV, Hiilamo H, et al. Effect of the Framework Convention on Tobacco Control and voluntary industry health warning labels on passage of mandated cigarette warning labels from 1965 to 2012: transition probability and event history analyses. *Am J Public Health* 2013;103(11):2041-7. doi: 10.2105/AJPH.2013.301324 [published Online First: 2013/09/14]
34. Uang R, Hiilamo H, Glantz SA. Accelerated Adoption of Smoke-Free Laws After Ratification of the World Health Organization Framework Convention on Tobacco Control. *Am J Public Health* 2016;106(1):166-71. doi: 10.2105/AJPH.2015.302872
35. Hiilamo H, Glantz S. FCTC followed by accelerated implementation of tobacco advertising bans. *Tob Control* 2016 doi: 10.1136/tobaccocontrol-2016-053007
36. Mahoney J. Path Dependence in Historical Sociology. *Theory and Society* 2000;29:507-48.
37. Crosbie E, Sosa P, Glantz SA. Defending strong tobacco packaging and labelling regulations in Uruguay: transnational tobacco control network versus Philip Morris International. *Tob Control* 2018;27(2):185-94. doi: 10.1136/tobaccocontrol-2017-053690 [published Online First: 2017/03/25]
38. Uang R, Crosbie E, Glantz SA. Tobacco control law implementation in a middle-income country: Transnational tobacco control network overcoming tobacco industry opposition in Colombia. *Glob Public Health* 2018;13(8):1050-64. doi: 10.1080/17441692.2017.1357188 [published Online First: 2017/08/18]

- 1  
2  
3 39. Blecher E. Targeting the affordability of cigarettes: a new benchmark for taxation policy in low-  
4 income and-middle-income countries. *Tob Control* 2010;19(4):325-30. doi:  
5 10.1136/tc.2009.030155  
6  
7 40. Blecher E, Ross H, Leon ME. Cigarette affordability in Europe. *Tob Control* 2013;22(4):e6. doi:  
8 10.1136/tobaccocontrol-2012-050575  
9  
10 41. Gilmore AB, Fooks G, Drope J, et al. Exposing and addressing tobacco industry conduct in low-income  
11 and middle-income countries. *Lancet* 2015;385(9972):1029-43. doi: 10.1016/S0140-  
12 6736(15)60312-9  
13  
14 42. Wipfli H. The Global War on Tobacco. Mapping the World's First Public Health Treaty. Baltimore:  
15 Johns Hopkins University Press 2016.  
16  
17 43. Blecher E, Ross H, Stoklosa M. Lessons learned from cigarette tax harmonisation in the European  
18 Union. *Tob Control* 2014;23(e1):e12-4. doi: 10.1136/tobaccocontrol-2012-050728  
19  
20 44. Campaign for Tobacco-Free Kids. Tobacco tax success story: United Kingdom. Washington, 2012.  
21  
22 45. Sinha DN, Gupta PC, Kumar A, et al. The poorest of poor suffer the greatest burden from smokeless  
23 tobacco use: A study from 140 countries. *Nicotine Tob Res* 2017 doi: 10.1093/ntr/ntx276  
24  
25  
26  
27  
28  
29  
30  
31  
32  
33  
34  
35  
36  
37  
38  
39  
40  
41  
42  
43  
44  
45  
46  
47  
48  
49  
50  
51  
52  
53  
54  
55  
56  
57  
58  
59  
60



**FIGURE CAPTIONS**

Figure 1. Tobacco tax rates in 1998/1999 and 2014 as percent of retail price.

Figure 2. Shares of price of 100 cigarette packs of Gross Domestic Product per Capita in 1999 and 2014 as percent of retail price.

For peer review only



\* Country has not ratified FCTC.

Figure 1. Tobacco tax rates in 1998/1999 and 2014 as percent of retail price.

Caption : Figure 1. Tobacco tax rates in 1998/1999 and 2014 as percent of retail price.

504x377mm (300 x 300 DPI)



\* Country has not ratified FCTC.

Figure 2. Shares of price of 100 cigarette packs of Gross Domestic Product per Capita in 1999 and 2014 as percent of retail price.

Caption : Figure 2. Shares of price of 100 cigarette packs of Gross Domestic Product per Capita in 1999 and 2014 as percent of retail price.

504x313mm (300 x 300 DPI)

view only
